# Supplementary material for: GRIDSS: sensitive and specific genomic rearrangement detection using positional de Bruijn graph assembly
Source: PubMed Central journal article supplement (PMC5741059; doi:10.1101/gr.222109.117), 2017-12
Supplement: supp_gr.222109.117_Supplemental_Fig_S1.pdf [file supp_gr.222109.117_Supplemental_Fig_S1.pdf]

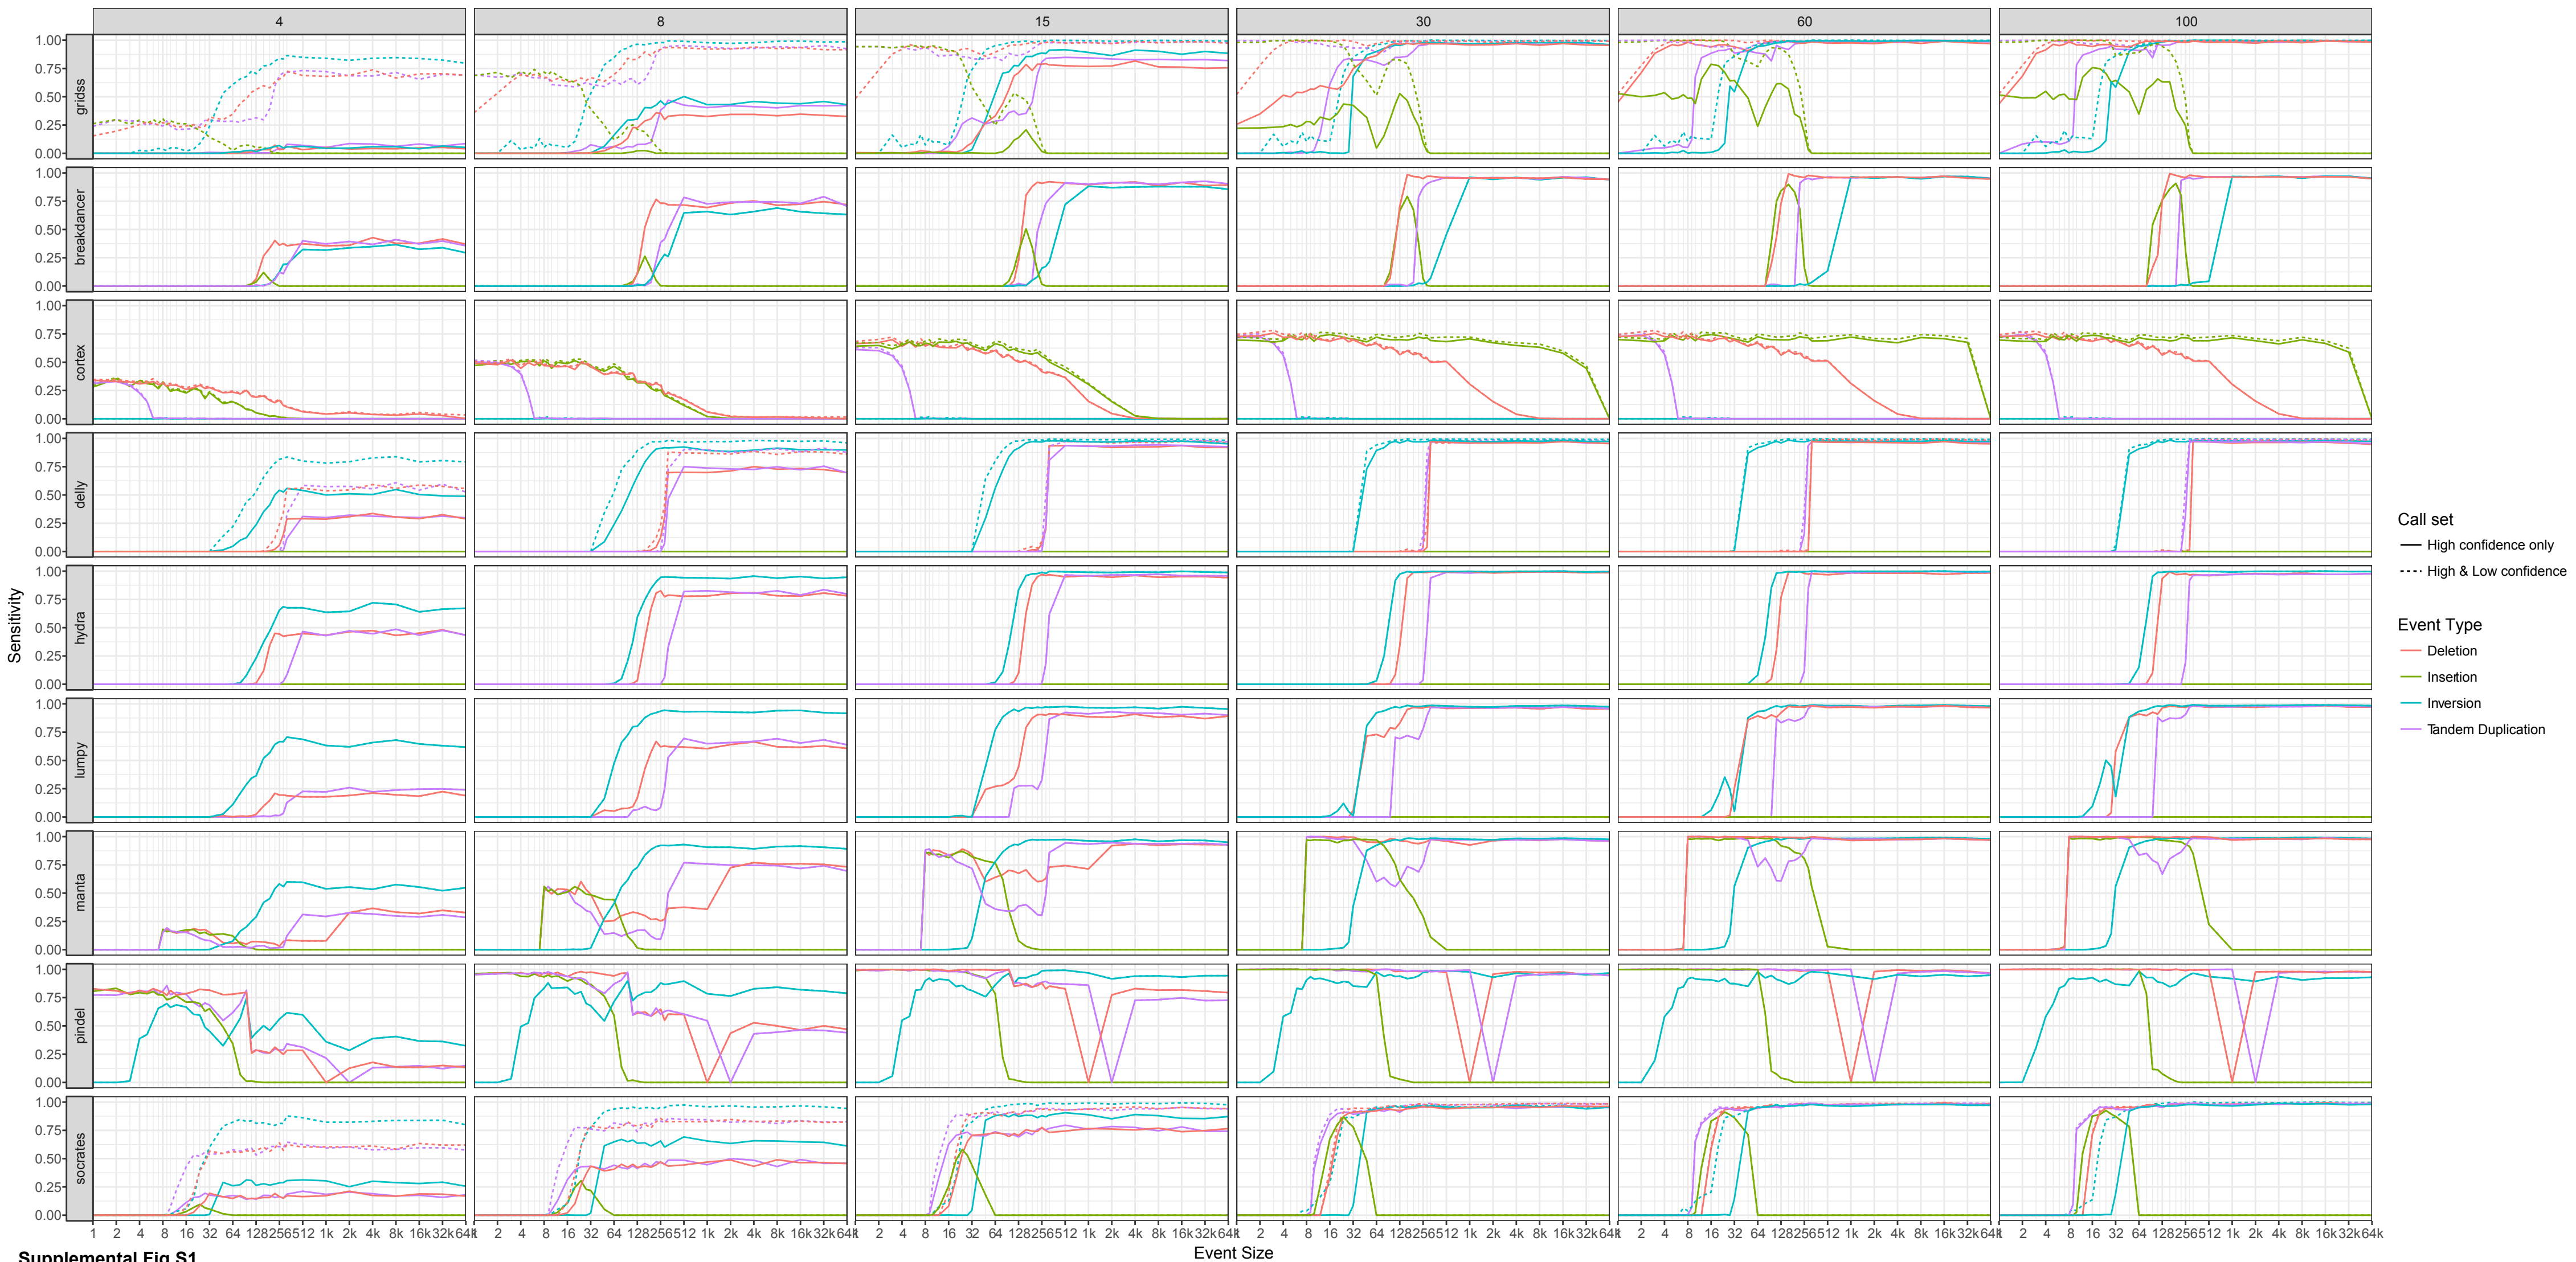

**Supplemental Fig S1**  
 Comparison of simple event calls by read depth. At low levels of coverage, GRIDSS is able to detect large events at lower levels of coverage than the other calls, but such events are not in the default GRIDSS call set due to the low levels of support.
