# Supplementary material for: GRIDSS: sensitive and specific genomic rearrangement detection using positional de Bruijn graph assembly
Source: PubMed Central journal article supplement (PMC5741059; doi:10.1101/gr.222109.117), 2017-12

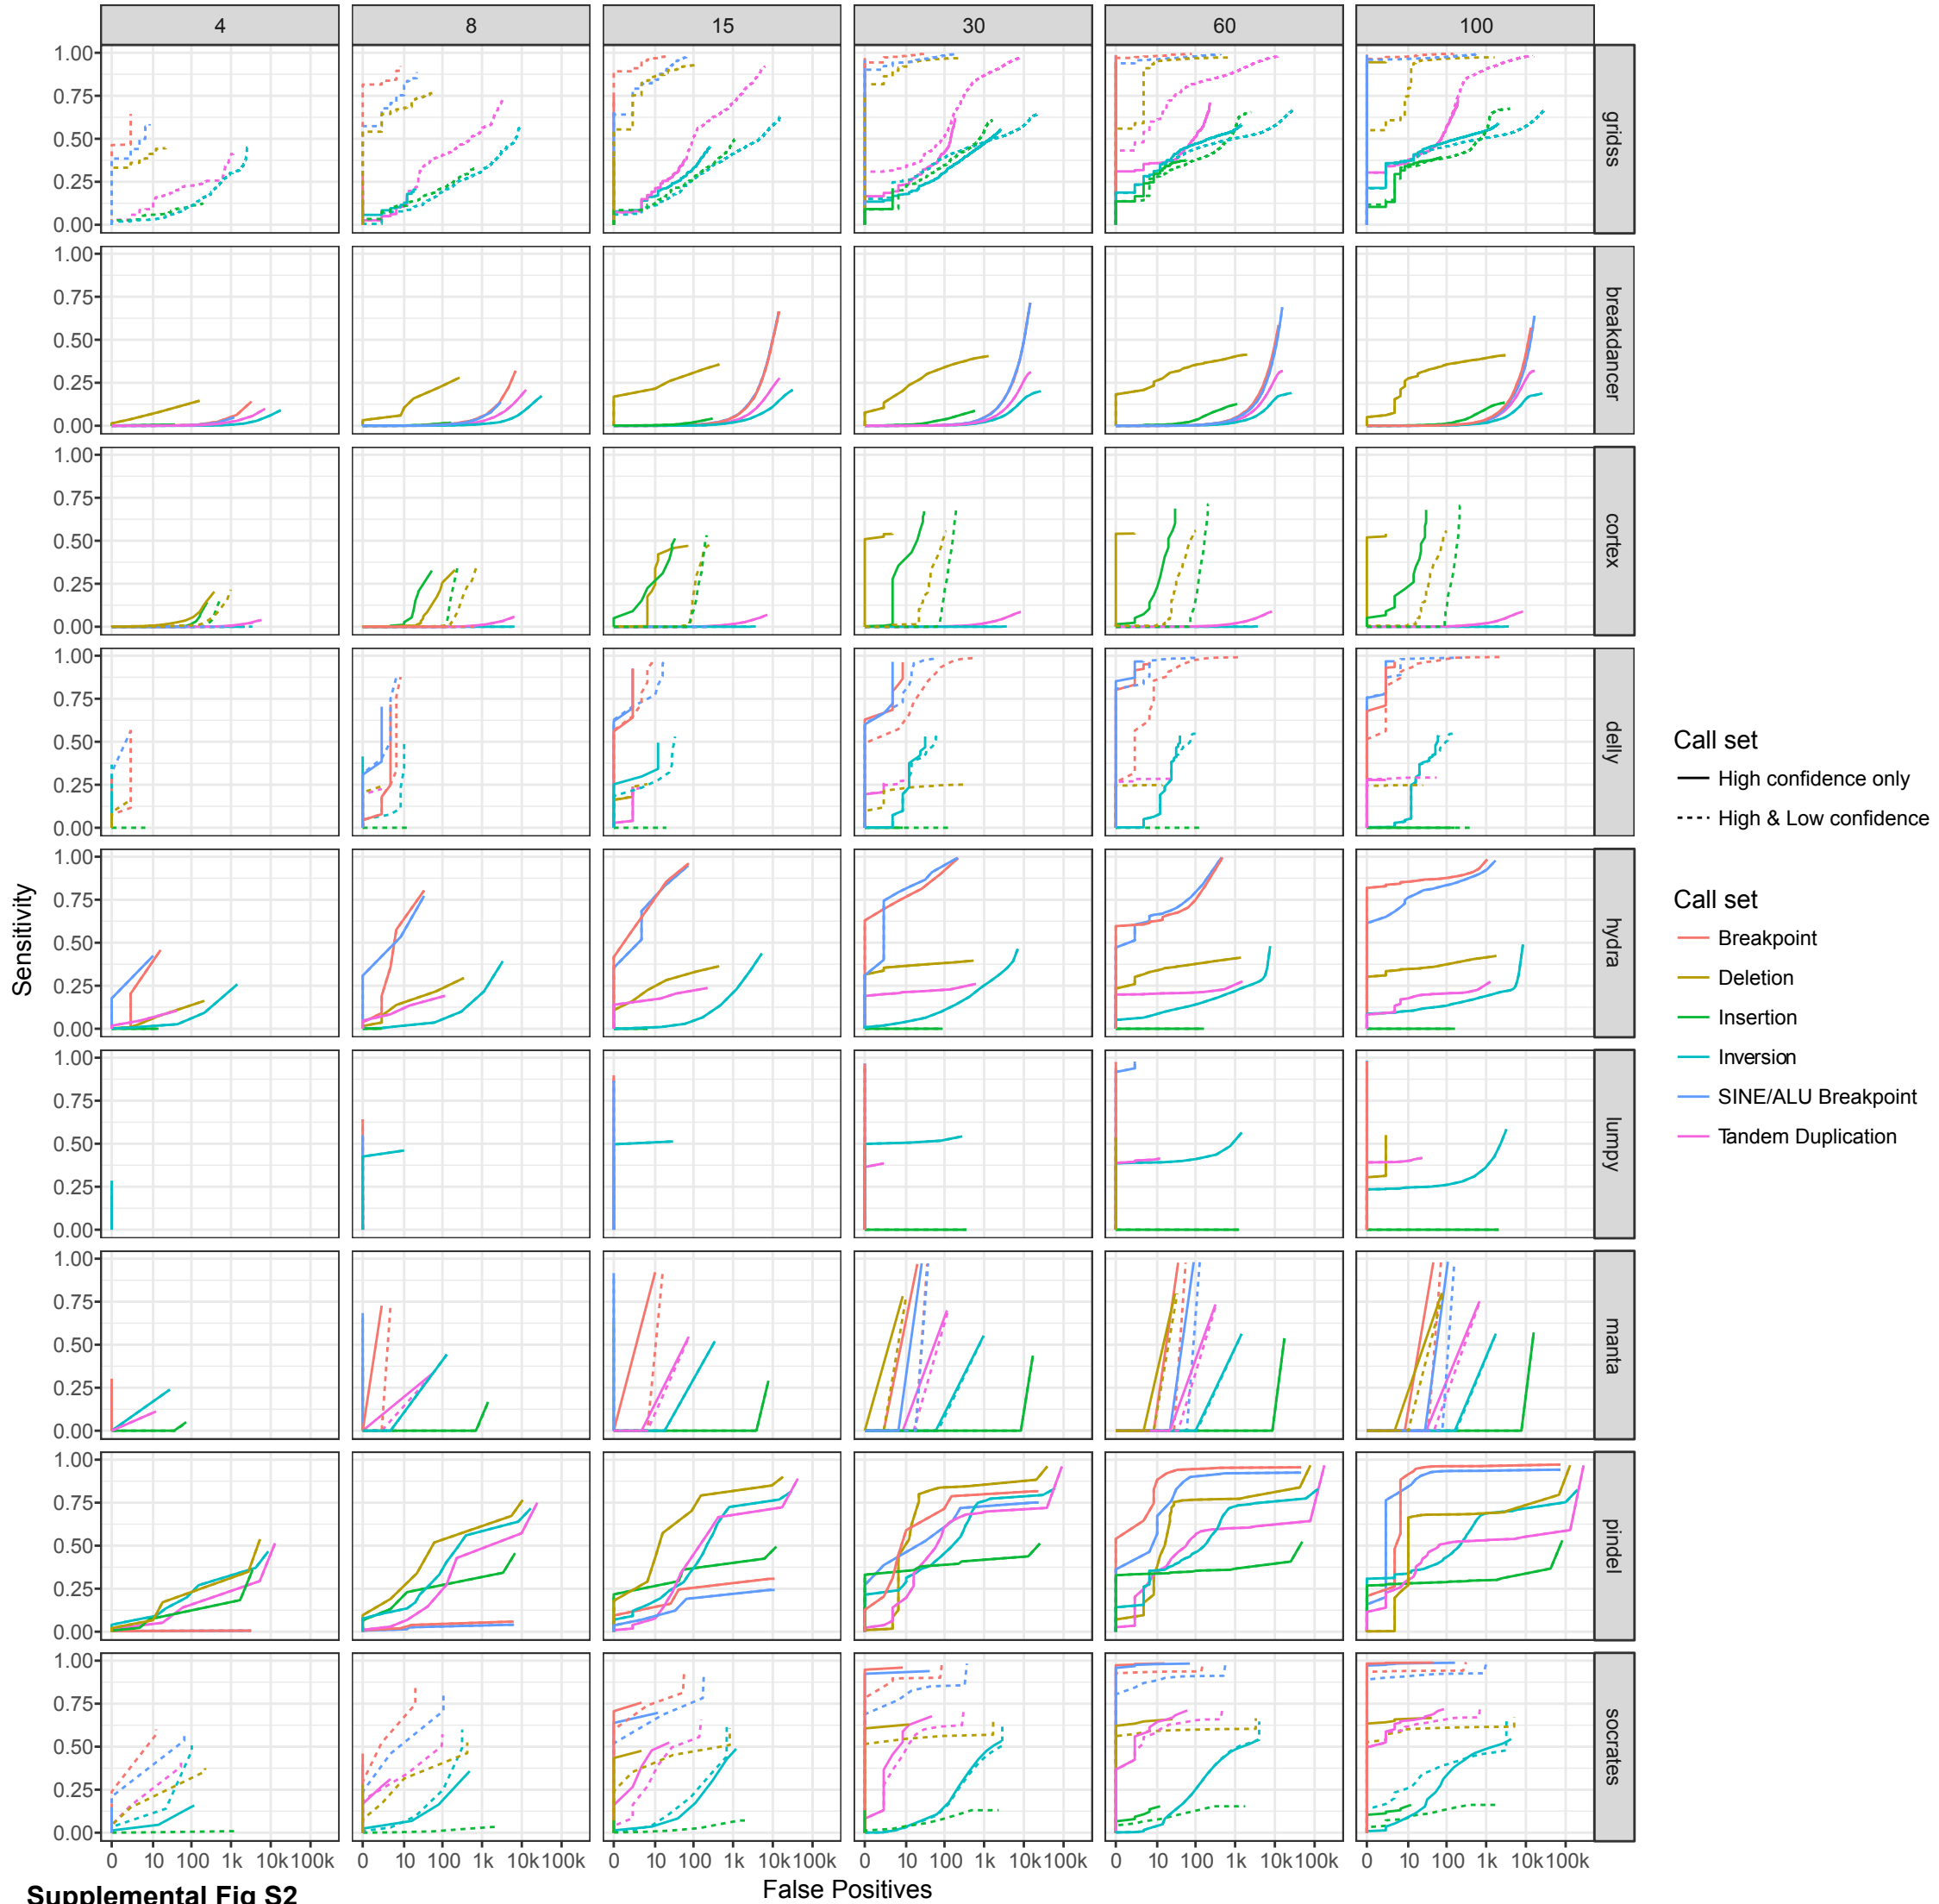

Supplement: supp_gr.222109.117_Supplemental_Fig_S2.pdf [file supp_gr.222109.117_Supplemental_Fig_S2.pdf]
