# Supplementary material for: GRIDSS: sensitive and specific genomic rearrangement detection using positional de Bruijn graph assembly
Source: PubMed Central journal article supplement (PMC5741059; doi:10.1101/gr.222109.117), 2017-12
Supplement: supp_gr.222109.117_Supplemental_Fig_S5.pdf [file supp_gr.222109.117_Supplemental_Fig_S5.pdf]

## Precision by assembly status 2x100bp

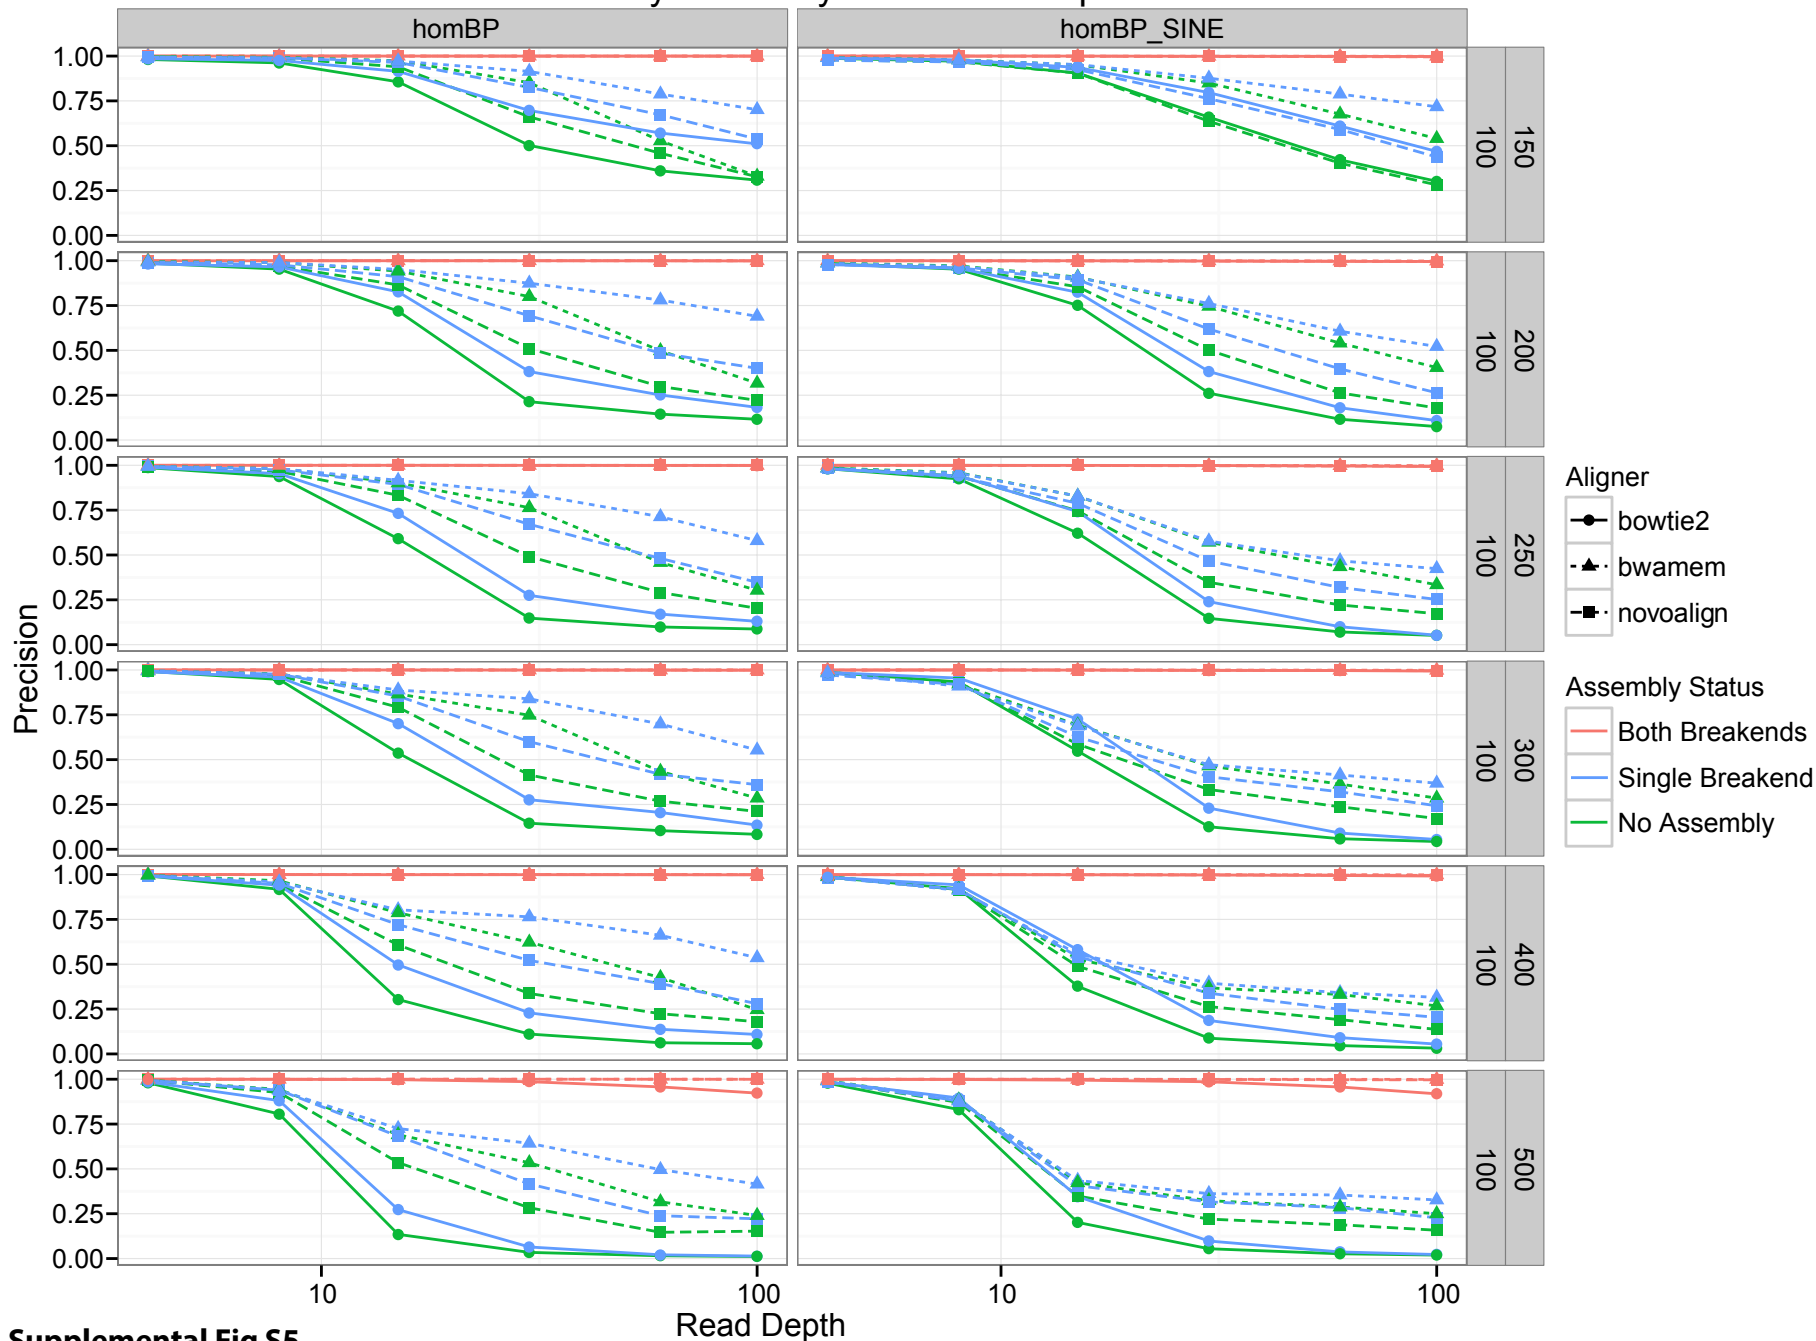

### Supplemental Fig S5

GRIDSS precision. At low coverage, assembly support at both breakpoint is not present. From 15x allelic coverage onwards, precision of calls supported by only one-sided assembly or with no assembly support drops dramatically, whilst precision of calls with reciprocal assembly support remains close to 100% under all conditions.
