# Supplementary material for: GRIDSS: sensitive and specific genomic rearrangement detection using positional de Bruijn graph assembly
Source: PubMed Central journal article supplement (PMC5741059; doi:10.1101/gr.222109.117), 2017-12
Supplement: supp_gr.222109.117_Supplemental_Fig_S7.pdf [file supp_gr.222109.117_Supplemental_Fig_S7.pdf]

# Assembly rate by repeat class

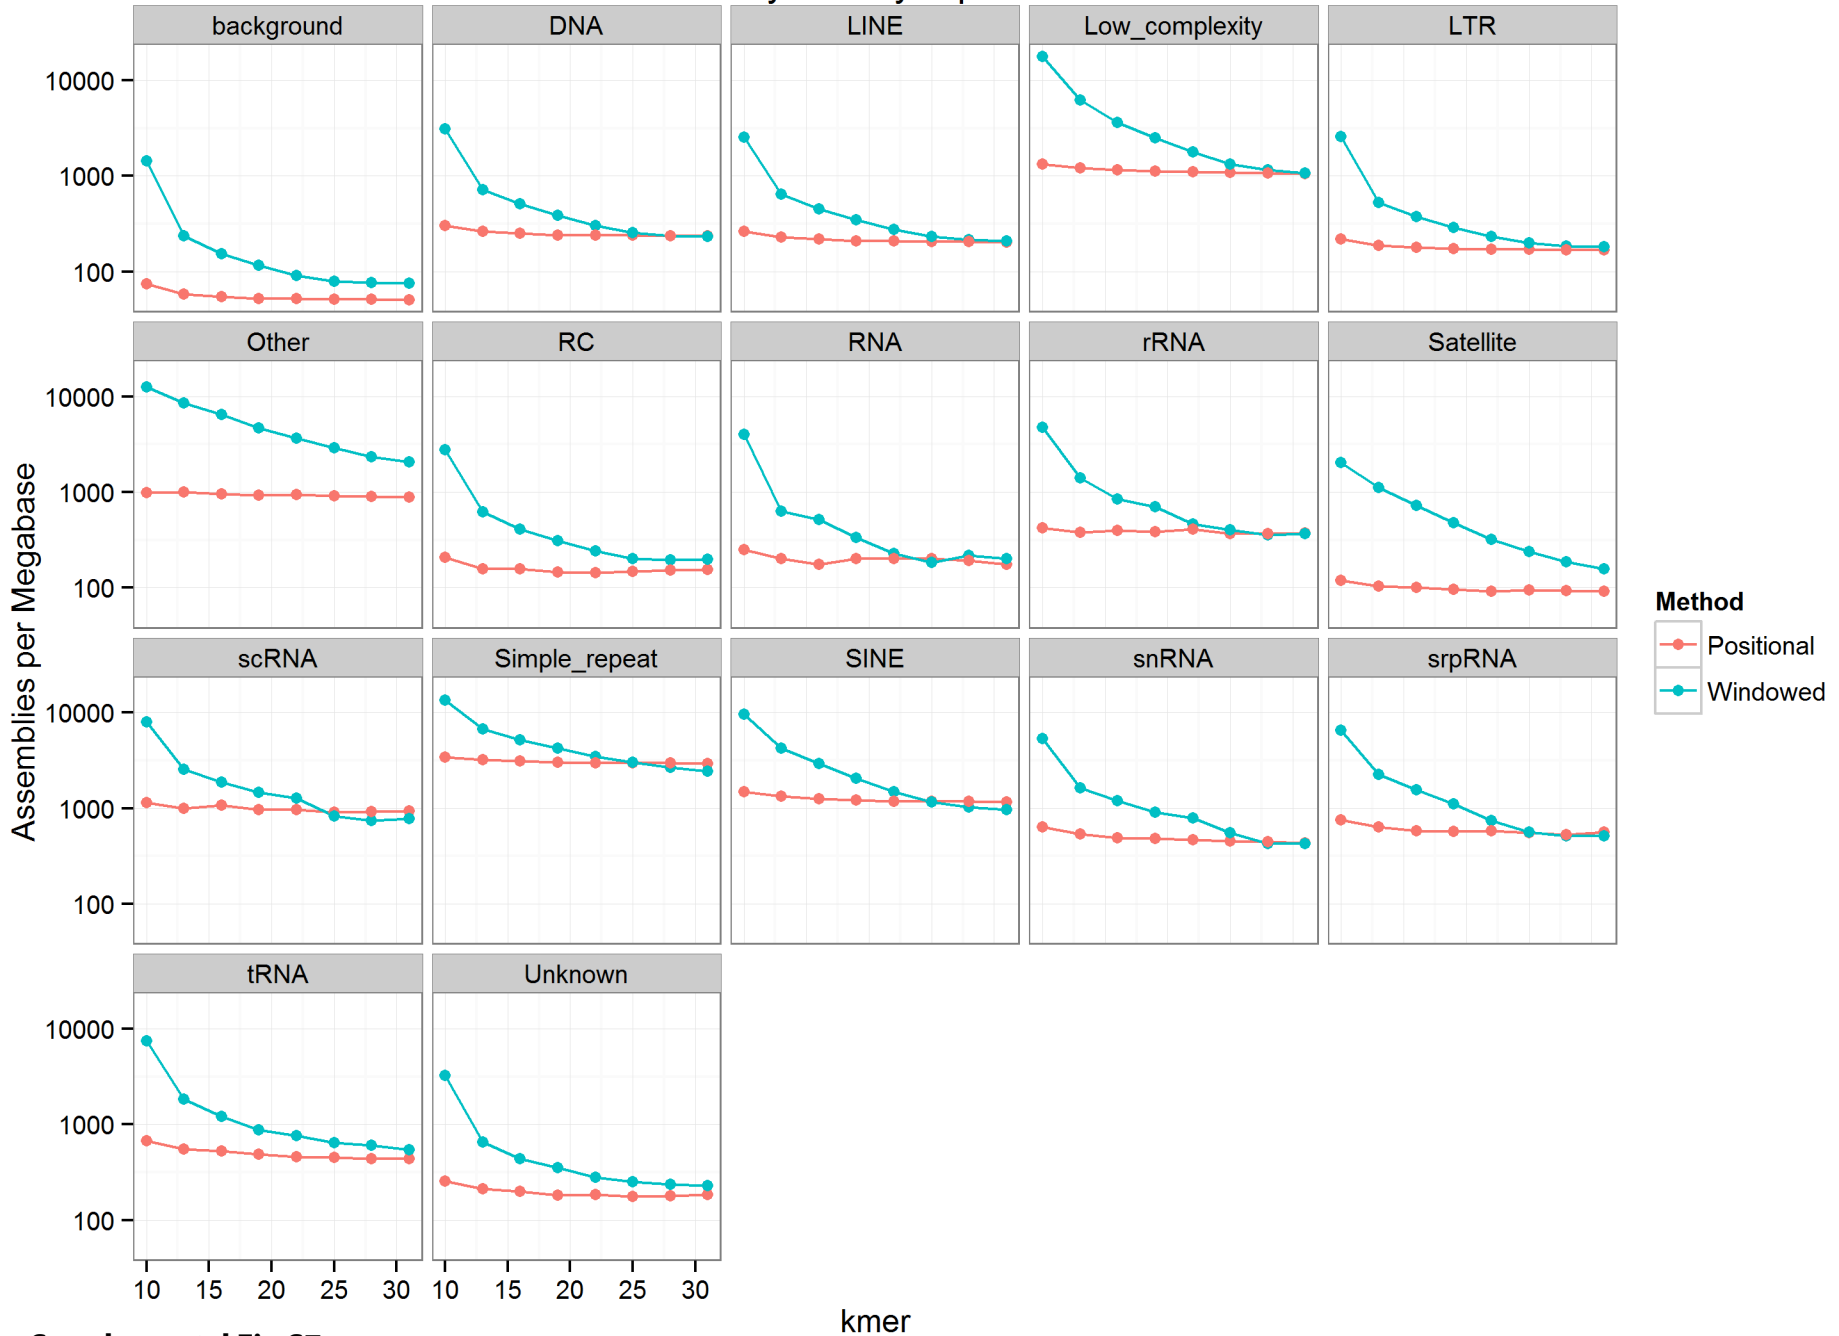

## Supplemental Fig S7

Breakdown of assembly rates by RepeatMasker top-level repeat class annotations. Unannotated regions are labelled as background. Positional de Bruijn graph assembly allows for more robust assembly using short k-mers
