# Supplementary material for: GRIDSS: sensitive and specific genomic rearrangement detection using positional de Bruijn graph assembly
Source: PubMed Central journal article supplement (PMC5741059; doi:10.1101/gr.222109.117), 2017-12
Supplement: supp_gr.222109.117_Supplemental_Fig_S8.pdf [file supp_gr.222109.117_Supplemental_Fig_S8.pdf]

## Assembly quality score distribution by repeat class

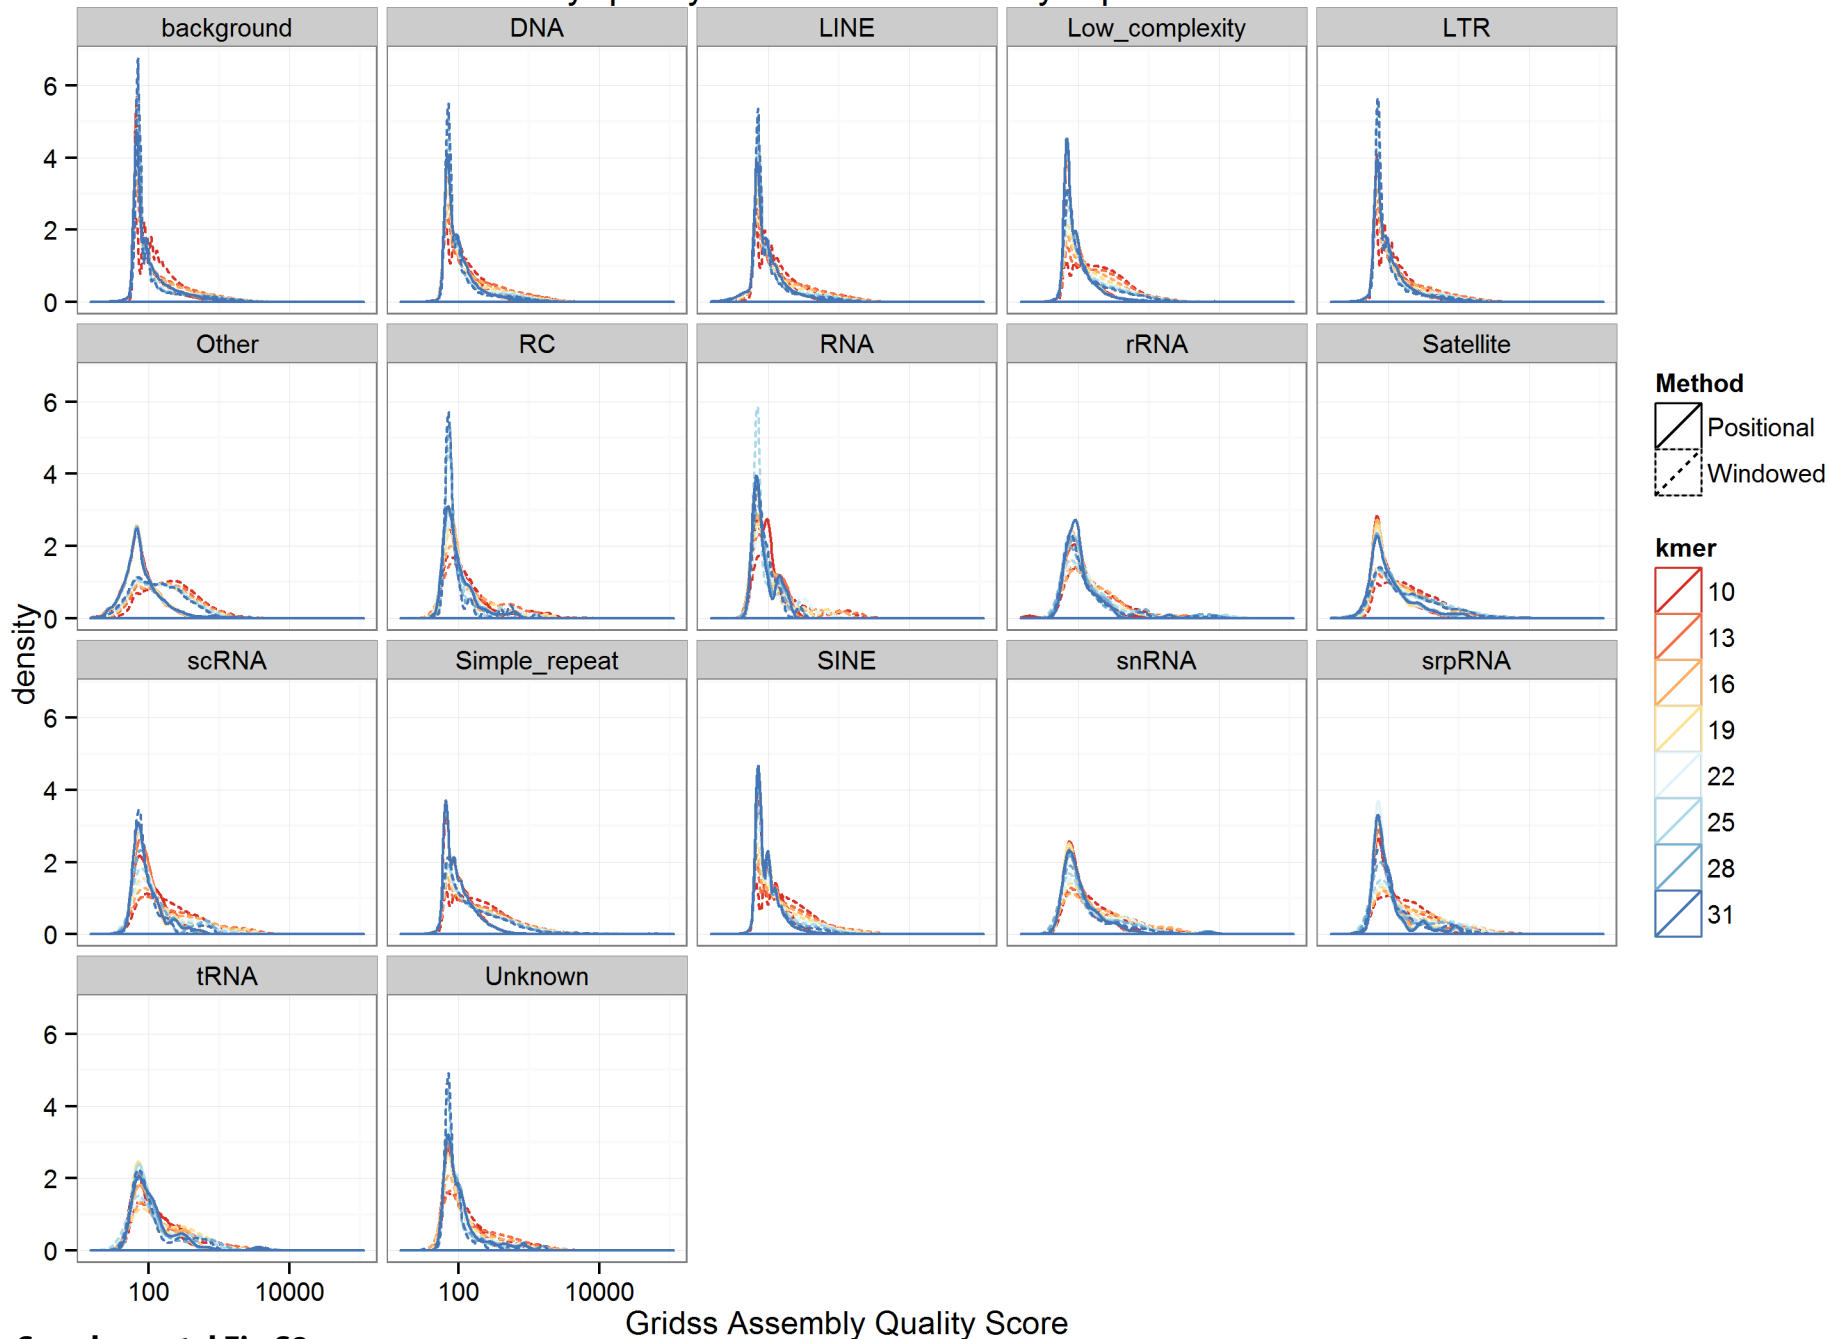

### Supplemental Fig S8

Assembly quality score distribution by repeat type. Over-assembly of low complexity and simple repeats regions results in high confidence false positive calls using windowed assembly, but not positional assembly.
