# Supplementary material for: GRIDSS: sensitive and specific genomic rearrangement detection using positional de Bruijn graph assembly
Source: PubMed Central journal article supplement (PMC5741059; doi:10.1101/gr.222109.117), 2017-12
Supplement: supp_gr.222109.117_Supplemental_Fig_S9.pdf [file supp_gr.222109.117_Supplemental_Fig_S9.pdf]

# Assembly quality score distribution by assembly type

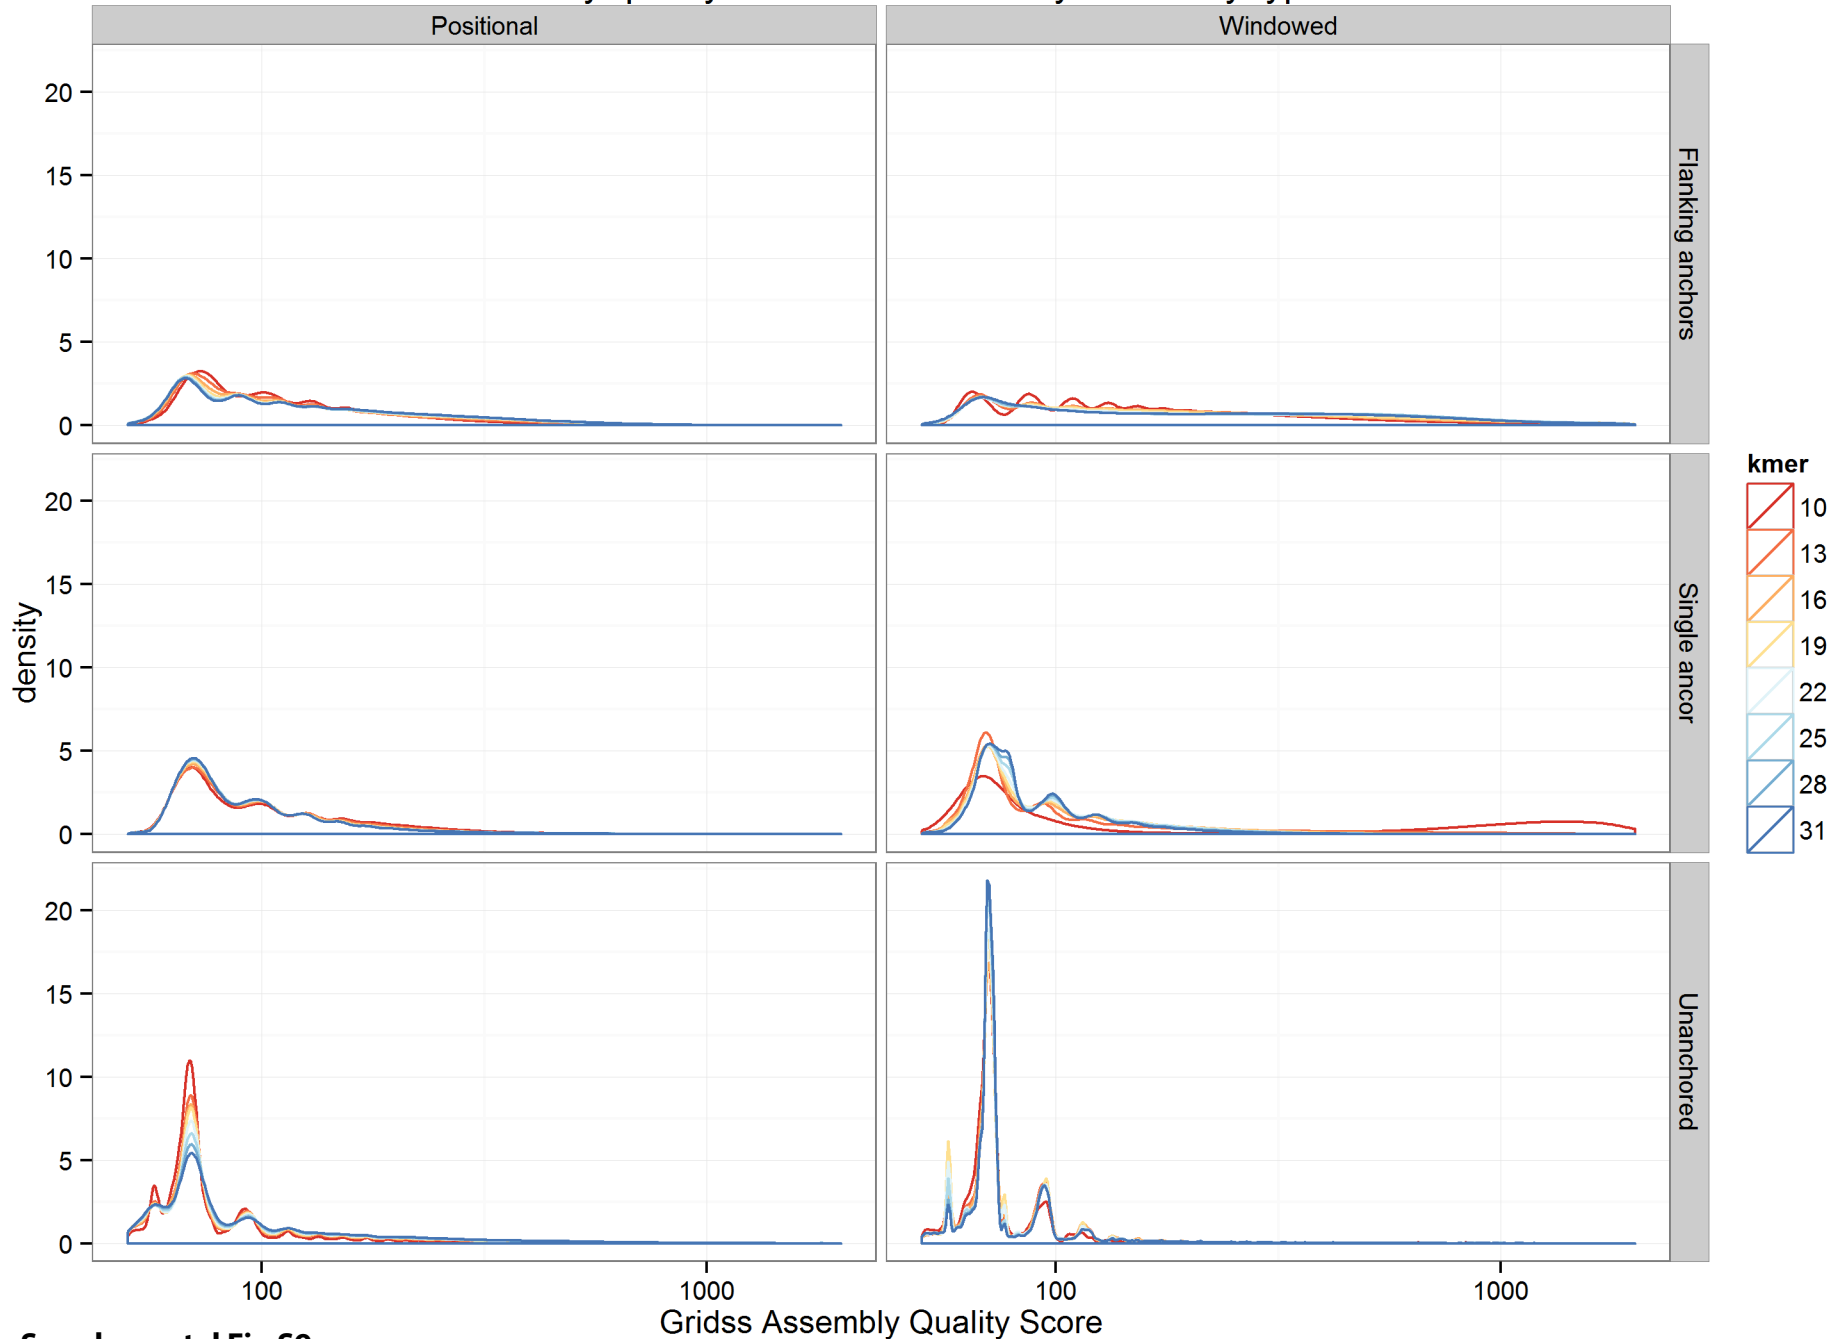

## Supplemental Fig S9

Distribution of assembly scores by assembly method and anchor type. A high rate of flanking anchor assembly using windowed assembly is indicative of intra-window misassembly due to sequence homology. This misassembly does not occur when using positional de Bruijn graph assembly.
