# Supplementary material for: GRIDSS: sensitive and specific genomic rearrangement detection using positional de Bruijn graph assembly
Source: PubMed Central journal article supplement (PMC5741059; doi:10.1101/gr.222109.117), 2017-12
Supplement: supp_gr.222109.117_Supplemental_Fig_S10.pdf [file supp_gr.222109.117_Supplemental_Fig_S10.pdf]

## Assembly rate by anchor type

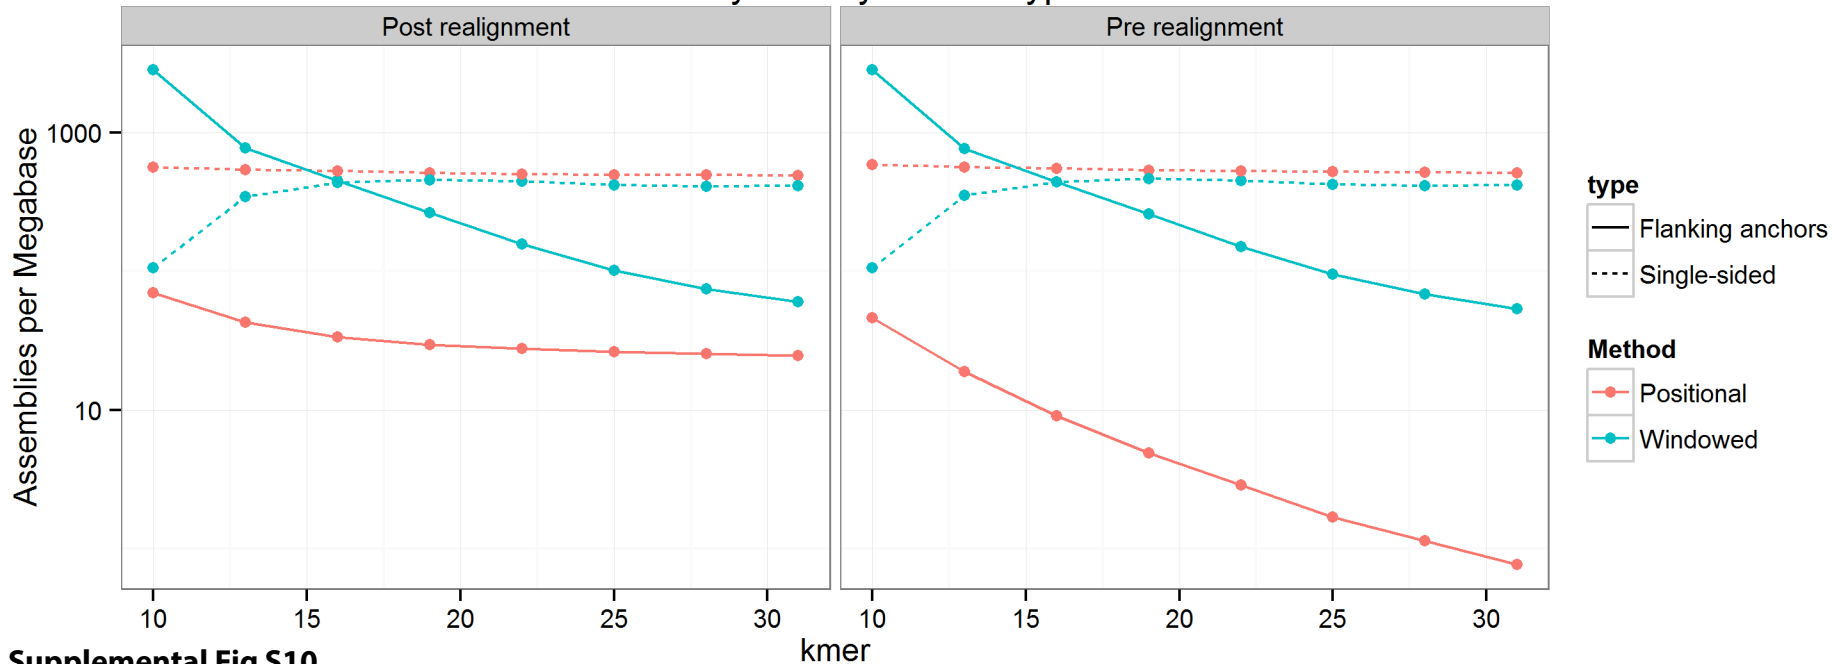

### Supplemental Fig S10

Assembly rate by anchor type. Whilst both windowed and positional assembly has similar detection capability for large events in which only a single side of the event can be assembled, windowed assembly calls orders of magnitude more intra-window events due to misassembly of unrelated reads containing sequence homology. The trend of a reducing post realignment flanking anchor assembly indicates that a k-mer size of 40-50 would be required for windowed assembly performance to match that of positional assembly with k-mer of 20 for intra-window events.
