# Supplementary material for: GRIDSS: sensitive and specific genomic rearrangement detection using positional de Bruijn graph assembly
Source: PubMed Central journal article supplement (PMC5741059; doi:10.1101/gr.222109.117), 2017-12
Supplement: supp_gr.222109.117_Supplemental_Fig_S11.pdf [file supp_gr.222109.117_Supplemental_Fig_S11.pdf]

## NA12878 deletions by repeat class (PacBio validation)

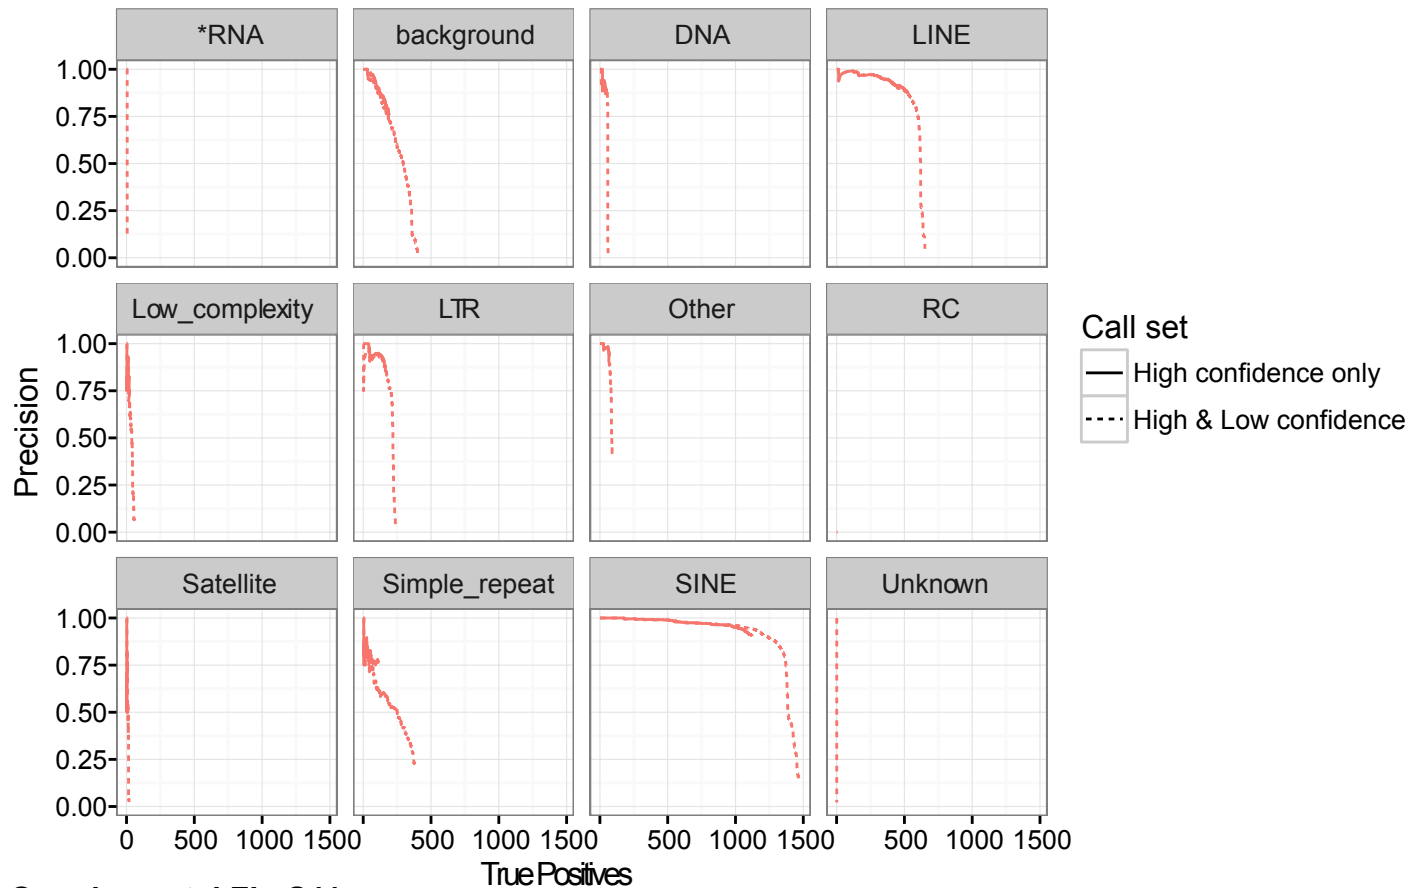

### Supplemental Fig S11

Variant calls by repeat class. Breakpoints are broken down by RepeatMasker repeat class annotation. RNA repeat classes have been merged, background indicates no repeat annotation. GRIDSS is able to robustly call structural variants in large repeats but has a higher false discovery rate in low complexity, simple, and satellite repeats.
