# Supplementary material for: GRIDSS: sensitive and specific genomic rearrangement detection using positional de Bruijn graph assembly
Source: PubMed Central journal article supplement (PMC5741059; doi:10.1101/gr.222109.117), 2017-12
Supplement: supp_gr.222109.117_Supplemental_Fig_S13.pdf [file supp_gr.222109.117_Supplemental_Fig_S13.pdf]

## GRIDSS model comparison

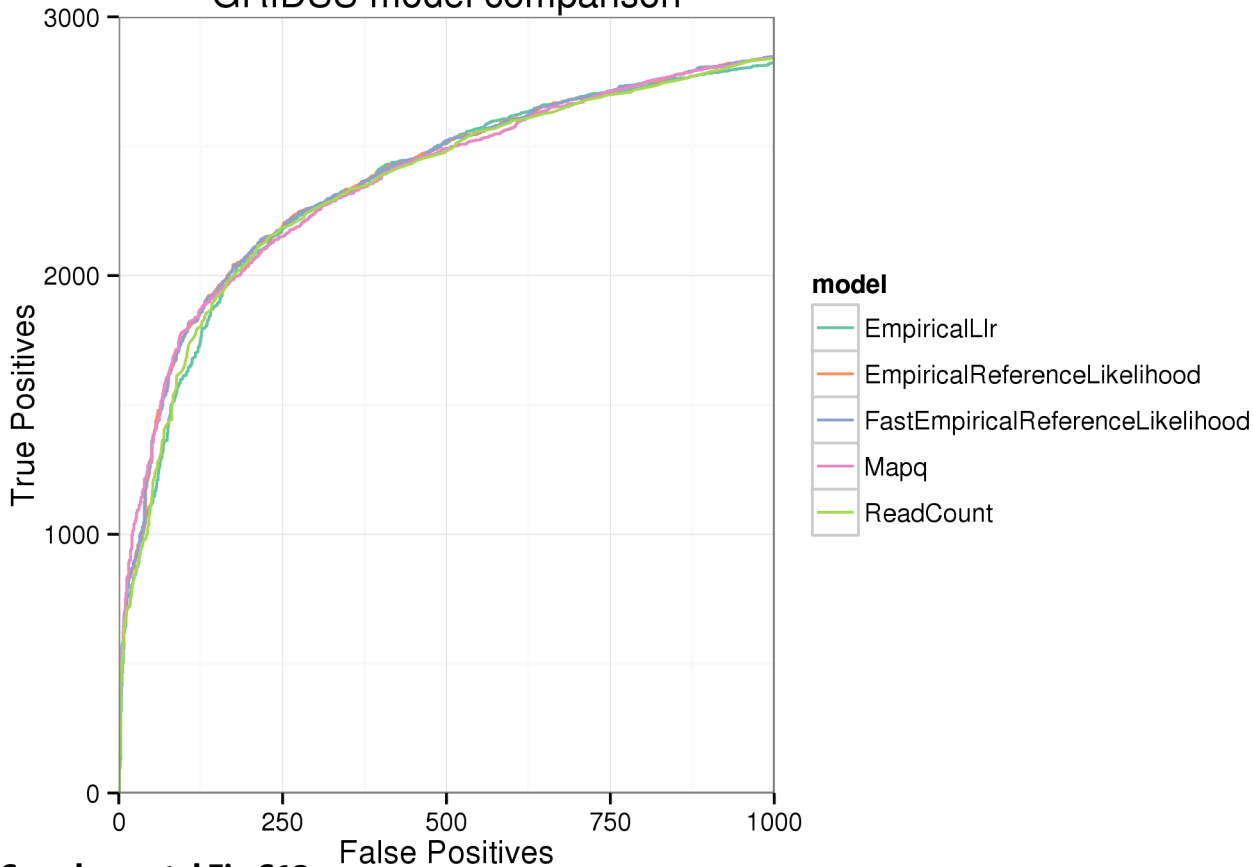

### Supplemental Fig S13

ROC curve for alternative GRIDSS models for platinum genomics 2x100bp 50x NA12878 using Moleclo/PacBio long read truth set. The probabilistic variant scoring makes a small contribution to GRIDSS performance.
