# Supplementary material for: GRIDSS: sensitive and specific genomic rearrangement detection using positional de Bruijn graph assembly
Source: PubMed Central journal article supplement (PMC5741059; doi:10.1101/gr.222109.117), 2017-12
Supplement: supp_gr.222109.117_Supplemental_Fig_S14.pdf [file supp_gr.222109.117_Supplemental_Fig_S14.pdf]

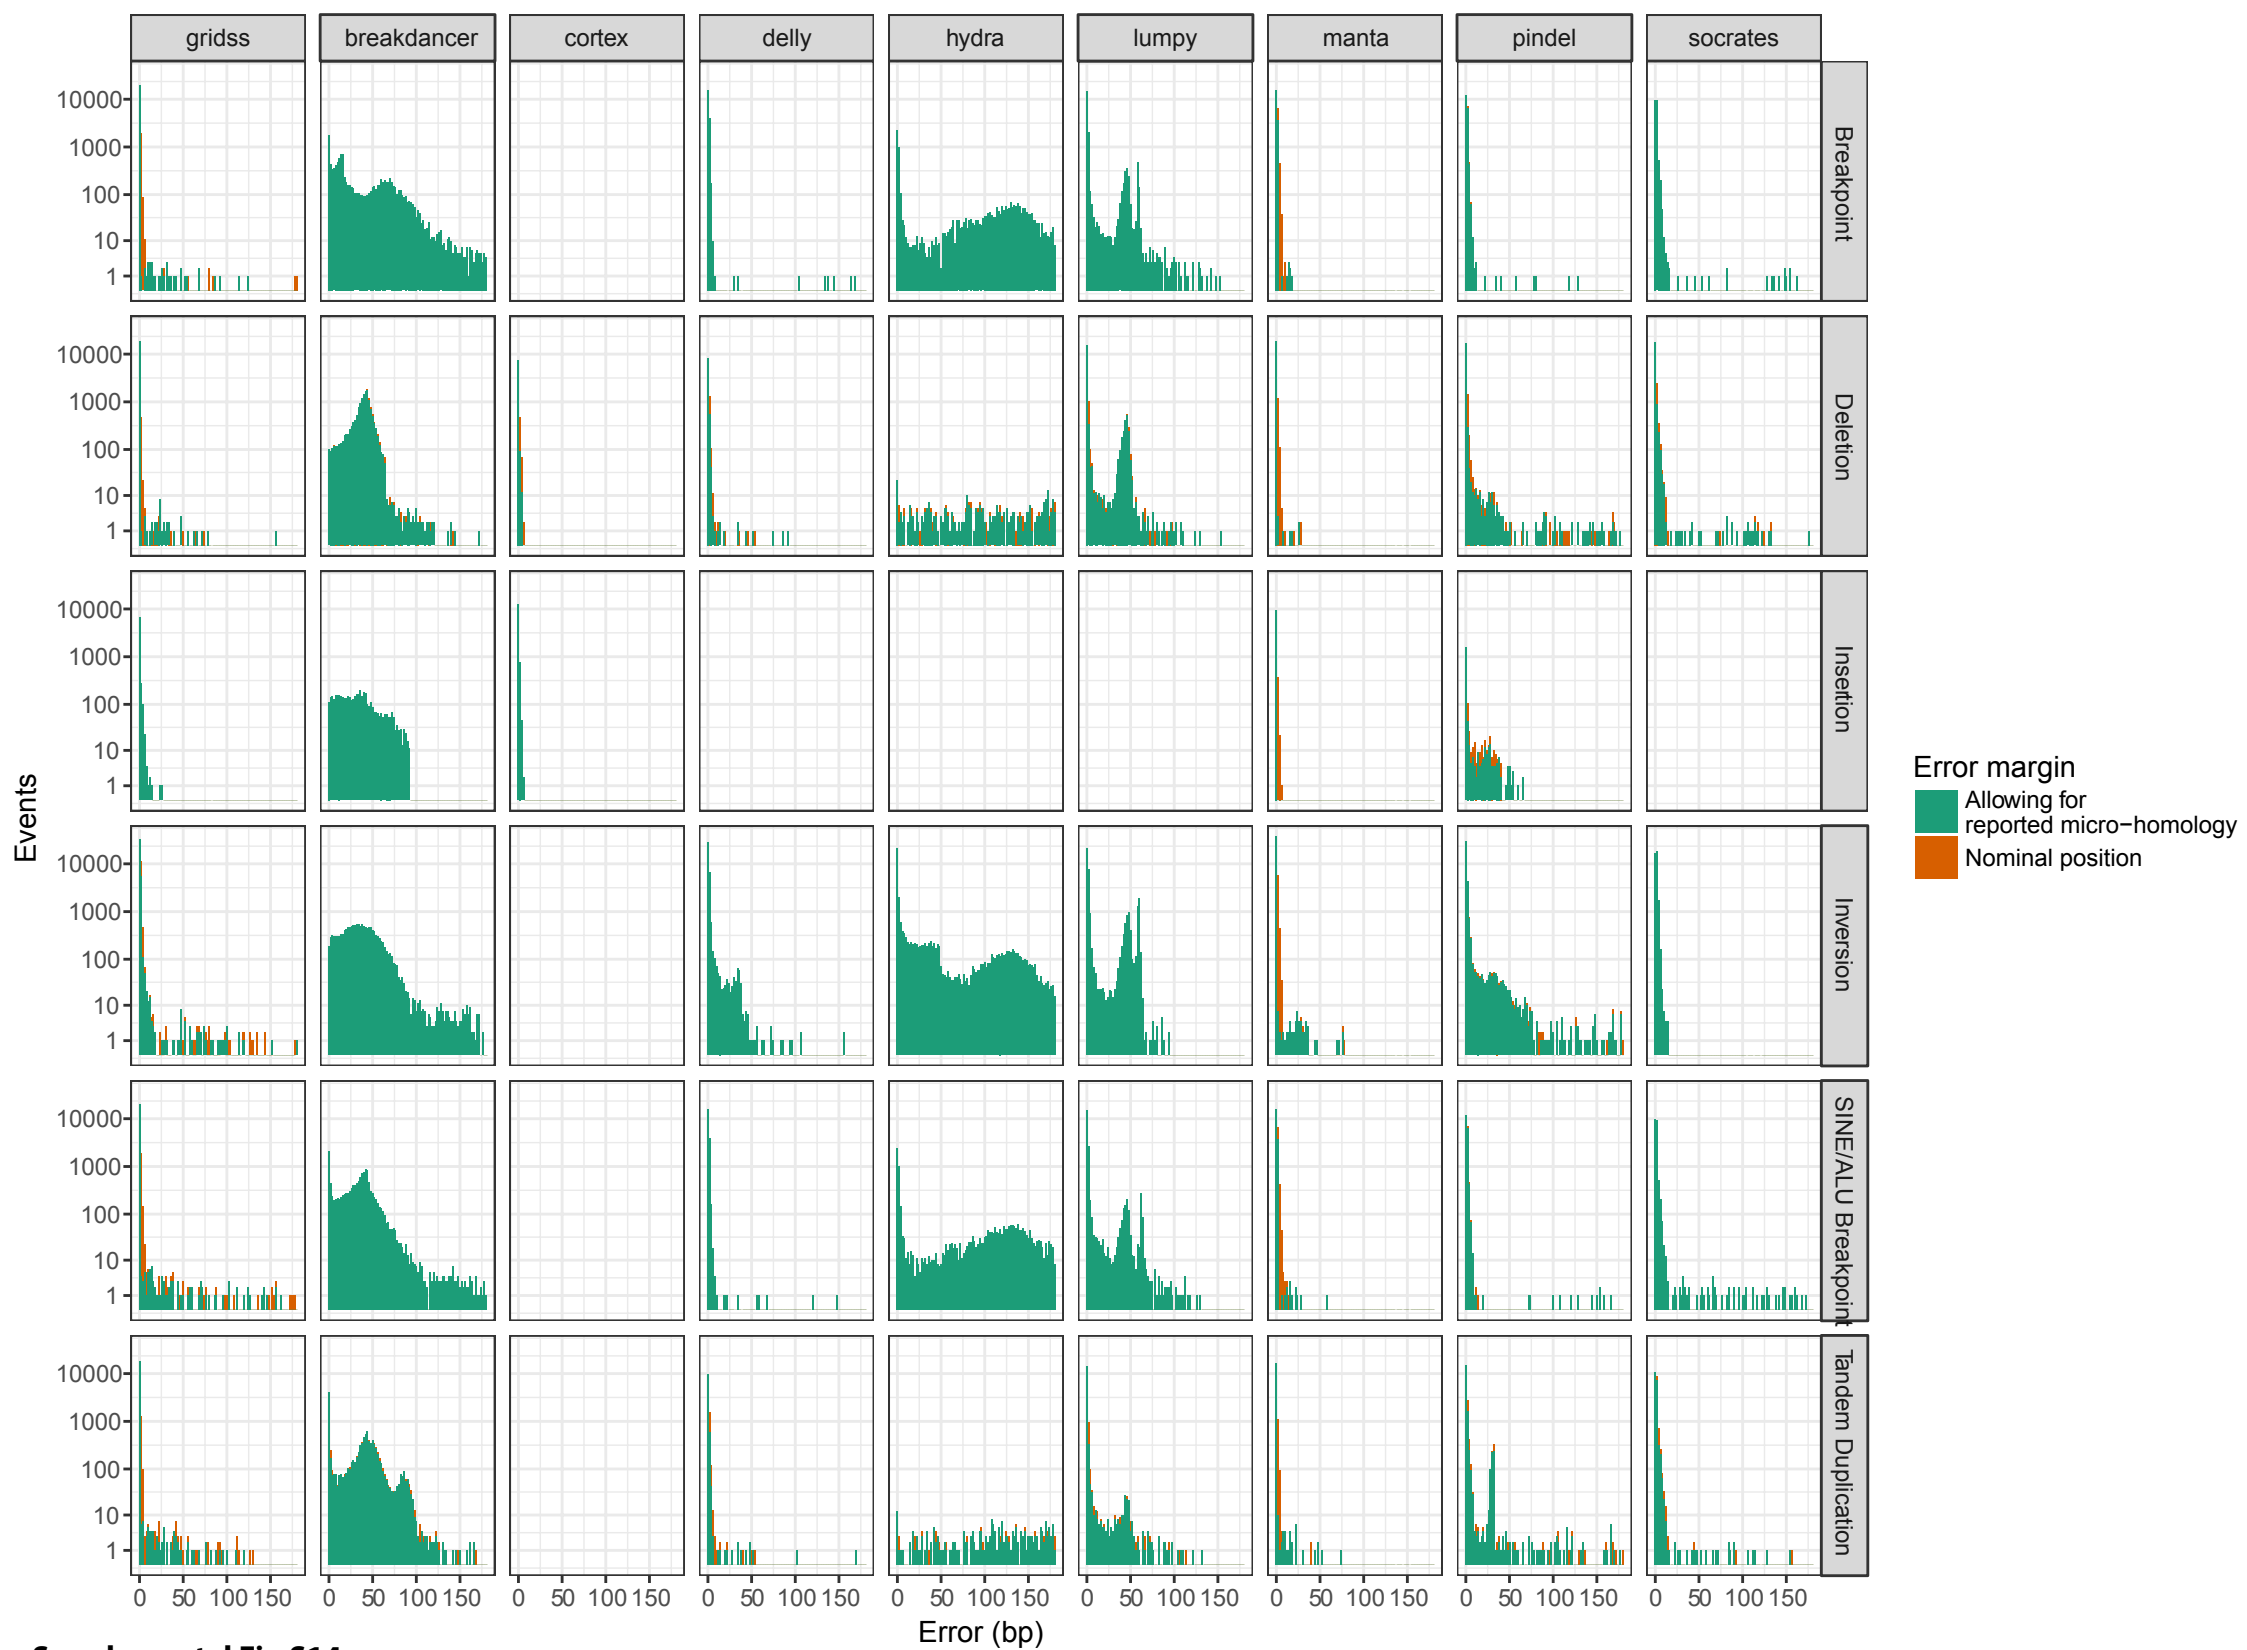

### Supplemental Fig S14

Positional error in variant position relative the simulated event position. A green histogram allowing for caller-reported micro-homologies has been overlayed over the orange histogram considering only the called position. GRIDSS, cortex, and manta are able to correctly report micro-homologies. Except for the high positional error of lumpy, the separation of callers into discordant pair and split read/assembly based callers can be inferred from the error profile.
