# Supplementary material for: GRIDSS: sensitive and specific genomic rearrangement detection using positional de Bruijn graph assembly
Source: Genome Res. 2017 Dec;27(12):2050–60. doi: 10.1101/gr.222109.117 (PMC5741059; doi:10.1101/gr.222109.117)
Supplement: Supplemental Material [file supp_gr.222109.117_Supplemental_Table_S2.xlsx]

## Sheet: Sheet1
Caller	Published call set concordance	Overlap with GRIDSS High Confidence	Additional Calls
GRIDSS	0.93	1	20787
BreakDancer	0.17	0.25	4454
Cortex	0.01	0.01	10
DELLY	0.91	0.58	8019
HYDRA	0.27	0.28	4742
LUMPY	0.91	0.71	2094
Pindel	0.4	0.51	916
SOCRATES	0.86	0.74	45939
Supplemental Table S2. Comparison of structural variant callers to the published, and the GRIDS high confidence call sets. Comparison based on variant calling on 2x100bp libraries only. Additional calls are those not in either the GRIDSS high confidence call set or the published call set.
