# Supplementary material for: GRIDSS: sensitive and specific genomic rearrangement detection using positional de Bruijn graph assembly
Source: HighWire-hosted journal article supplement (doi:10.1101/gr.222109.117), 2017-11-02
Supplement: Supplemental_gridss_source.zip [file mmc3.xlsx]

## Sheet: Summary
Table S2. Related to Figure 2. Genomic fusions on the 778, 449, GOT3, T1000 and LPS141 neochromosomes identified using clusters of discordant read pairs.
Cell line	Total fusions	Chromosomal partners	Intrachromosomal fusions	Intrachromosomal fusions involving Chr12	Interchromosomal fusions
449	256	15	109 (43%)	38 (35%)	147 (57%)
778	586	16	235 (40%)	64 (63%)	351 (60%)
GOT3	402	7	279 (69%)	190 (68%)	123 (31%)
T1000	570	6	337 (59%)	231 (41%)	233 (41%)
LPS141	478	18	411(86%)	142 (35%)	67 (14%)

## Sheet: 449 (DR)
chrom1	start1	strand1	chrom2	start2	strand2	nreads
chr1	121355137	-	chr1	121358113	+	7
chr1	121355286	+	chr1	121356044	-	21
chr1	121358430	-	chr1	121480239	+	37
chr1	121359063	+	chr1	121482998	-	20
chr1	121480125	-	chr1	121483858	+	14
chr1	121482167	-	chr1	121483913	+	7
chr1	121484719	+	chr1	121484806	-	196
chr1	171812042	+	chr1	188381906	-	12
chr1	171915571	+	chr1	172344320	-	8
chr1	172536166	+	chr1	183836546	-	9
chr1	185829040	+	chr1	185886861	+	13
chr1	186262625	+	chr1	188451625	-	12
chr1	181849741	+	chr10	8469016	+	38
chr1	188328941	-	chr10	8476187	-	10
chr1	188741620	+	chr10	8465411	-	16
chr1	188968990	+	chr10	10758824	-	11
chr1	171045155	-	chr12	83591436	+	44
chr1	171814465	-	chr12	66053083	+	31
chr1	172372758	-	chr12	69345538	-	18
chr1	172392011	+	chr12	69081640	-	12
chr1	172778197	+	chr12	69191047	-	11
chr1	181839347	-	chr12	70799814	-	32
chr1	183844719	+	chr12	93039016	+	19
chr1	183849797	-	chr12	92863941	-	29
chr1	185888074	-	chr12	58025207	+	13
chr1	185921082	-	chr12	92960530	+	7
chr1	186034379	+	chr12	84100091	-	15
chr1	186036583	-	chr12	84315161	+	9
chr1	186398167	-	chr12	78928702	-	12
chr1	186409943	+	chr12	70524950	-	15
chr1	186597029	-	chr12	70575618	+	15
chr1	186639130	+	chr12	69428612	-	7
chr1	186673287	-	chr12	92924604	+	11
chr1	186705064	+	chr12	95464495	-	9
chr1	188272497	-	chr12	95446966	-	64
chr1	188320504	+	chr12	60549510	+	19
chr1	188369781	+	chr12	69091983	+	52
chr1	188377586	-	chr12	95463821	+	28
chr1	188379020	-	chr12	95463600	-	40
chr1	188379588	-	chr12	70876997	+	33
chr1	188382010	+	chr12	70296325	-	21
chr1	188386238	+	chr12	95449114	-	55
chr1	188626398	+	chr12	84380511	-	17
chr1	188640320	+	chr12	58923851	+	23
chr1	188698574	+	chr12	69306493	+	22
chr1	188831724	+	chr12	69410817	-	20
chr1	188833501	-	chr12	60541340	-	13
chr1	188937604	+	chr12	71283354	-	35
chr1	188993823	-	chr12	83573882	-	30
chr1	188601408	+	chr13	89321264	-	16
chr1	188380106	-	chr15	98970942	-	13
chr1	121484050	-	chr19	27733301	+	2851
chr1	121484514	-	chr19	27734813	+	160
chr1	121484582	-	chr19	27733350	+	416
chr1	188784388	-	chr20	14537686	+	32
chr1	185750221	-	chr21	27511187	-	34
chr1	194931156	-	chr21	28657161	+	10
chr1	188346388	+	chr3	196700030	-	7
chr1	188690153	-	chr3	196707781	+	17
chr1	172215373	-	chr4	11782502	+	8
chr1	188610758	-	chr4	8431014	-	7
chr1	185934195	+	chr5	1389465	-	29
chr1	186267432	+	chr5	1341661	+	28
chr1	194808779	-	chr5	41956131	-	12
chr1	188835272	-	chr6	46422498	+	13
chr1	186021838	-	chr9	86036540	+	20
chr1	188732575	-	chrX	31180859	+	10
chr10	12560474	+	chr10	12562970	-	17
chr10	42383228	-	chr10	42394989	+	7
chr10	42383410	-	chr10	42385731	+	137
chr10	42383452	-	chr10	42392934	+	56
chr10	42383563	-	chr10	42598559	+	26
chr10	42383585	-	chr10	42388148	+	14
chr10	42383801	+	chr10	42385105	-	40
chr10	42384660	+	chr10	42386936	-	66
chr10	42384682	-	chr10	42394575	+	139
chr10	42384693	-	chr10	42390498	+	25
chr10	42384799	+	chr10	42599596	-	8
chr10	42384975	-	chr10	42597882	+	114
chr10	42385110	-	chr10	42391556	+	101
chr10	42385171	-	chr10	42388135	+	7
chr10	42385342	+	chr10	42392633	-	1216
chr10	42385728	+	chr10	42596957	-	154
chr10	42385728	+	chr10	42388286	-	12
chr10	42385729	+	chr10	42390293	-	76
chr10	42385731	+	chr10	42393732	-	61
chr10	42386145	+	chr10	42599552	-	84
chr10	42386166	+	chr10	42387196	-	82
chr10	42386536	-	chr10	42598209	+	165
chr10	42386933	-	chr10	42393197	+	24
chr10	42386944	-	chr10	42389540	+	11
chr10	42386947	-	chr10	42599986	+	79
chr10	42387851	-	chr10	42598182	+	29
chr10	42388019	+	chr10	42599311	-	36
chr10	42388027	+	chr10	42596820	-	57
chr10	42388279	-	chr10	42394565	+	8
chr10	42388279	-	chr10	42392806	+	117
chr10	42388388	+	chr10	42388736	-	8
chr10	42388467	+	chr10	42597476	-	10
chr10	42389100	+	chr10	42392211	-	7
chr10	42389154	-	chr10	42598185	+	102
chr10	42389619	+	chr10	42596856	-	14
chr10	42390440	+	chr10	42599586	-	118
chr10	42390649	-	chr10	42597867	+	18
chr10	42390905	+	chr10	42392209	-	53
chr10	42392052	-	chr10	42597638	+	13
chr10	42392272	-	chr10	42394580	+	8
chr10	42392525	+	chr10	42393686	-	12
chr10	42392800	+	chr10	42596873	-	385
chr10	42393189	+	chr10	42599089	-	20
chr10	42393311	-	chr10	42598205	+	29
chr10	42394295	+	chr10	42596813	-	28
chr10	42394584	+	chr10	42599496	-	75
chr10	42394870	-	chr10	42597889	+	42
chr10	42394977	+	chr10	42597076	-	14
chr10	42597790	+	chr10	42597765	-	7
chr10	42598191	+	chr10	42599535	-	780
chr10	8015396	-	chr12	84100947	+	17
chr10	8221812	+	chr12	74324359	+	31
chr10	8391893	-	chr12	69444317	+	10
chr10	8413975	+	chr12	95528621	-	11
chr10	8472488	+	chr12	58026630	-	12
chr10	8481283	-	chr12	74255508	-	14
chr10	8483956	-	chr12	75593579	-	7
chr10	8494792	+	chr12	69392458	+	10
chr10	8761125	-	chr12	74255147	+	13
chr10	10518503	+	chr12	75601532	-	13
chr10	10720145	-	chr12	69330472	+	22
chr10	10771680	+	chr12	83958298	+	7
chr10	10894765	-	chr12	71626922	-	14
chr10	10894898	+	chr12	83948303	+	8
chr10	12472385	-	chr12	65867430	-	17
chr10	8406086	+	chr13	89469763	+	19
chr10	10979010	-	chr13	74857565	-	8
chr10	12466961	-	chr15	96118173	-	11
chr10	8215616	-	chr16	63000891	-	43
chr10	10509740	+	chr20	14400891	-	23
chr10	10853117	-	chr20	14609325	+	7
chr10	12475373	+	chr21	22882887	-	15
chr12	58014352	+	chr12	58151960	+	16
chr12	58015973	-	chr12	95449941	-	11
chr12	58020099	+	chr12	93112170	-	8
chr12	58028080	+	chr12	58029237	-	124
chr12	58059135	+	chr12	66027423	+	8
chr12	58122491	-	chr12	84157882	+	24
chr12	60540380	-	chr12	75549258	-	106
chr12	65861916	-	chr12	92847291	-	27
chr12	66042651	-	chr12	69096878	+	15
chr12	66527657	+	chr12	66529873	-	12
chr12	69077569	-	chr12	82462391	-	42
chr12	69216577	-	chr12	73375815	+	15
chr12	69257778	+	chr12	71498527	-	10
chr12	69307919	-	chr12	75726112	-	12
chr12	69340359	+	chr12	69477657	+	12
chr12	69392091	+	chr12	75720178	-	18
chr12	69789048	-	chr12	83546635	-	31
chr12	70355037	+	chr12	91635596	-	13
chr12	70594842	+	chr12	70597587	-	13
chr12	70694928	+	chr12	70705268	-	12
chr12	70756835	-	chr12	74480892	+	27
chr12	70971166	-	chr12	71451551	-	15
chr12	71497585	-	chr12	82519257	+	22
chr12	71622110	-	chr12	78862307	-	12
chr12	71622325	+	chr12	83583497	+	10
chr12	71627081	+	chr12	78862443	+	18
chr12	73362556	-	chr12	74478619	-	75
chr12	74225000	-	chr12	74866054	-	16
chr12	74462582	+	chr12	83948128	-	34
chr12	75835320	-	chr12	83962122	+	13
chr12	79125328	+	chr12	82467067	-	10
chr12	82470448	+	chr12	93103749	+	13
chr12	83578744	-	chr12	83785565	-	12
chr12	83581897	-	chr12	92990920	-	18
chr12	83965940	+	chr12	84056190	+	18
chr12	84139090	+	chr12	92922068	-	28
chr12	84391736	-	chr12	95456182	-	9
chr12	95531850	+	chr12	95588265	+	28
chr12	69463781	-	chr13	74160970	-	19
chr12	83568966	+	chr13	62122596	-	15
chr12	58008433	-	chr15	99490377	+	8
chr12	66050869	-	chr15	98966892	-	11
chr12	69263990	+	chr15	92564408	+	26
chr12	69309039	+	chr15	99106804	-	18
chr12	74459665	-	chr15	92303226	-	40
chr12	75569157	+	chr15	85476384	-	19
chr12	75890384	-	chr15	98967637	-	31
chr12	84156176	-	chr15	99321275	+	24
chr12	60545655	+	chr16	49745004	-	10
chr12	84390872	+	chr16	63007439	+	28
chr12	78880489	-	chr20	1293632	-	20
chr12	83572854	+	chr20	14401407	+	12
chr12	84088887	-	chr20	14467142	-	7
chr12	84308097	+	chr20	14545301	+	17
chr12	66044377	+	chr21	27510108	-	23
chr12	66051545	-	chr21	28213975	+	14
chr12	69403433	+	chr21	27905274	-	7
chr12	74246569	+	chr21	27886612	-	29
chr12	75652747	+	chr21	43053105	-	8
chr12	78856318	+	chr21	27980501	-	14
chr12	83565803	-	chr21	42717498	-	12
chr12	92885314	+	chr21	27897402	+	36
chr12	93016608	+	chr21	28421959	-	19
chr12	58923254	-	chrX	31167667	-	75
chr12	79110758	-	chrX	31177535	-	20
chr13	62199212	+	chr13	62205878	-	19
chr13	89811748	+	chr21	28221601	-	15
chr15	92674610	+	chr15	92677077	-	27
chr16	56245496	-	chr16	62770063	-	37
chr19	27731979	-	chr19	27734197	+	9
chr19	27732813	+	chr19	27733045	-	11
chr2	158645386	-	chr12	82478693	+	38
chr20	1389191	+	chr20	1390809	-	23
chr20	14571645	-	chr20	14573794	+	8
chr20	14571768	+	chr20	14573741	-	14
chr20	14478084	+	chr21	38072280	-	11
chr20	14516172	-	chrX	31186288	+	13
chr3	196625622	-	chr10	42387283	-	14
chr3	196625624	-	chr10	42596818	-	99
chr3	196625626	-	chr10	42389423	-	10
chr3	196625629	-	chr10	42384410	-	13
chr3	196625646	-	chr10	42599282	-	73
chr3	196625776	+	chr10	42394580	+	25
chr3	196625777	+	chr10	42598229	+	108
chr3	196625777	+	chr10	42392769	+	11
chr3	196625777	+	chr10	42384402	+	10
chr3	196625779	+	chr10	42388205	+	61
chr3	196625779	+	chr10	42386227	+	213
chr3	192786909	-	chr12	69157846	-	14
chr3	195683654	-	chr12	75552058	+	18
chr3	196713968	-	chr12	60542085	+	13
chr4	8613430	+	chr12	69248233	+	20
chr4	9031170	-	chr12	84377659	-	7
chr4	9119698	+	chr12	69450405	+	9
chr4	24201353	-	chr12	95495103	-	20
chr4	26761135	-	chr12	82662354	-	15
chr4	28624631	-	chr12	69463685	+	8
chr4	28628104	+	chr12	82472973	-	21
chr4	24225091	+	chr15	98815842	-	7
chr4	8375684	-	chr6	114199464	+	23
chr4	28895863	-	chr6	46633166	-	8
chr4	28195357	-	chrX	31187926	-	11
chr5	42177905	+	chr10	10513276	-	15
chr5	1336172	+	chr12	58007674	-	34
chr5	39427024	-	chr12	70757140	+	22
chr5	42165127	+	chr12	70430511	+	7
chr5	41500826	-	chr21	27526100	+	34
chr5	42165947	+	chr5	42167763	-	12
chr6	114178959	-	chr10	10514946	+	48
chr6	45912850	-	chr12	95434135	-	22
chr6	114124650	+	chr12	70302127	+	28
chr9	80547698	-	chr12	95483646	-	22
chr9	82566189	-	chr12	70708010	+	15
chr9	86676381	-	chr12	58139348	+	18
chr9	86966994	+	chr12	58025022	-	19
chr9	86016149	-	chr21	28585309	-	12
chr9	80822112	-	chrX	31180036	+	23

## Sheet: 778 (DR)
chrom1	start1	strand1	chrom2	start2	strand2	nreads
chr1	171812098	+	chr1	188381898	-	107
chr1	172536228	+	chr1	183836546	-	116
chr1	172586404	+	chr1	172592046	-	63
chr1	182314285	-	chr1	182315456	-	112
chr1	185829093	+	chr1	185886913	+	53
chr1	185955561	+	chr1	188639972	-	115
chr1	186262690	+	chr1	188451629	-	65
chr1	188360627	+	chr1	188915807	+	8
chr1	188377591	-	chr1	188379026	-	10
chr1	188382996	+	chr1	188843192	+	74
chr1	188539521	+	chr1	188540224	-	177
chr1	189535852	-	chr1	190767521	+	63
chr1	171688220	-	chr10	7956819	-	24
chr1	181849745	+	chr10	8469082	+	120
chr1	186412974	+	chr10	10966166	+	24
chr1	188328941	-	chr10	8476184	-	27
chr1	188383151	-	chr10	8023302	+	134
chr1	188484373	-	chr10	3279164	+	101
chr1	188741684	+	chr10	8465411	-	45
chr1	188870900	-	chr10	8783739	+	61
chr1	188969054	+	chr10	10758822	-	19
chr1	189097275	-	chr10	11002059	+	21
chr1	189097315	+	chr10	11002138	+	199
chr1	171221897	+	chr13	74732479	-	69
chr1	171624002	+	chr13	74307809	-	110
chr1	186264383	-	chr13	91251859	-	107
chr1	188054878	+	chr13	75358112	-	65
chr1	188601484	+	chr13	89321257	-	97
chr1	194816345	+	chr13	76192730	+	104
chr1	171049328	+	chr15	92568904	-	120
chr1	172415424	-	chr15	99304934	-	15
chr1	172559948	+	chr15	99498779	+	132
chr1	183858595	+	chr15	101181339	+	118
chr1	186363172	-	chr15	97147444	+	108
chr1	188380086	-	chr15	98970942	-	83
chr1	188973679	-	chr15	99166350	-	66
chr1	188989169	+	chr15	99303698	-	112
chr1	189603215	+	chr15	74006502	+	95
chr1	171432341	+	chr16	49779876	-	41
chr1	188784387	-	chr20	14537687	+	125
chr1	171411896	-	chr21	28593907	+	16
chr1	172833861	+	chr21	23868319	-	20
chr1	185713687	+	chr21	28012168	+	25
chr1	185750225	-	chr21	27511187	-	36
chr1	186469298	-	chr21	42120222	+	27
chr1	188314343	-	chr21	27787340	-	83
chr1	188641317	-	chr21	42620980	-	10
chr1	189603248	-	chr21	38116620	+	20
chr1	194786563	-	chr21	28703564	+	14
chr1	194931153	-	chr21	28657217	+	44
chr1	188346441	+	chr3	196700035	-	14
chr1	188690148	-	chr3	196707845	+	28
chr1	171613113	-	chr4	28511748	+	34
chr1	171804823	-	chr4	11772953	-	35
chr1	172215356	-	chr4	11782561	+	102
chr1	185892393	-	chr4	9114102	+	47
chr1	185983784	-	chr4	28601485	-	73
chr1	186089260	+	chr4	28624902	-	132
chr1	188409719	+	chr4	28181946	-	55
chr1	188610754	-	chr4	8430998	-	20
chr1	194992474	+	chr4	25761696	-	91
chr1	183831416	-	chr5	41541679	+	208
chr1	183864101	+	chr5	1328564	-	61
chr1	185712876	-	chr5	1350090	-	98
chr1	185934258	+	chr5	1389466	-	133
chr1	186267448	+	chr5	1341717	+	80
chr1	188693834	-	chr5	41837380	+	113
chr1	189603466	+	chr5	134210068	-	46
chr1	194808782	-	chr5	41956132	-	70
chr1	188016174	-	chr7	20743973	+	61
chr1	172566186	-	chr9	85961850	+	50
chr1	181944075	+	chr9	86796884	-	73
chr1	186021832	-	chr9	86036612	+	73
chr1	186253375	+	chr9	79348925	-	96
chr1	188732586	-	chrX	31180933	+	21
chr10	3372606	+	chr10	10897421	-	7
chr10	12560537	+	chr10	12562968	-	104
chr10	8239354	+	chr13	89820272	-	21
chr10	8406151	+	chr13	89469815	+	90
chr10	8418095	+	chr13	69798688	-	55
chr10	10979008	-	chr13	74857562	-	70
chr10	5171192	+	chr15	92019576	+	29
chr10	8436521	-	chr15	85669542	+	31
chr10	10522814	-	chr15	91619252	+	67
chr10	10842711	+	chr15	99104309	+	77
chr10	12466963	-	chr15	96118160	-	81
chr10	8215617	-	chr16	63000891	-	191
chr10	3372736	+	chr20	14363225	-	38
chr10	10509805	+	chr20	14400893	-	96
chr10	10918693	-	chr20	579474	+	136
chr10	12475432	+	chr21	22882889	-	104
chr10	3264351	-	chrX	31193714	+	287
chr13	58573342	+	chr13	73728187	+	26
chr13	62199212	+	chr13	62205876	-	8
chr13	69526841	+	chr13	74761360	+	100
chr13	74333496	+	chr13	75081612	-	71
chr13	74619557	+	chr13	89854936	+	44
chr13	76107878	-	chr13	90808121	+	64
chr13	76512211	+	chr13	112718922	-	65
chr13	87612613	+	chr13	91872633	-	27
chr13	69927161	-	chr15	96242381	-	107
chr13	90847323	-	chr15	85647581	+	77
chr13	74251833	+	chr16	49815505	+	111
chr13	109819308	+	chr16	85502314	-	53
chr13	74843741	-	chr20	1456631	+	106
chr13	90857544	+	chr20	431514	-	107
chr13	66158706	+	chr21	43098611	+	61
chr13	89811752	+	chr21	28221600	-	31
chr13	74922504	-	chrX	31180878	+	32
chr13	76431195	-	chrX	31180264	+	132
chr15	85588166	-	chr15	92584143	+	22
chr15	92674643	+	chr15	92677064	-	217
chr15	101051762	+	chr15	101052295	-	13
chr15	85271120	+	chr16	62983434	+	88
chr15	85669378	-	chr16	70276086	-	8
chr15	85669597	+	chr16	70276239	+	21
chr15	85669602	+	chr16	70276060	-	71
chr15	101067079	-	chr16	49755654	+	9
chr15	85586943	+	chr21	42718344	-	13
chr15	91424747	+	chr21	28212120	-	80
chr15	97061101	-	chr21	42708169	-	29
chr15	98907455	+	chr21	28593029	-	18
chr15	99011938	+	chr21	42446290	+	50
chr15	85669226	-	chrX	31179617	-	37
chr16	56245494	-	chr16	62770064	-	147
chr16	66543906	+	chr16	85506815	+	63
chr16	58345824	+	chrX	31168457	+	140
chr16	70276104	-	chrX	31179771	+	7
chr2	156976471	-	chr5	24677469	+	84
chr20	1389210	+	chr20	1390809	-	97
chr20	14478164	+	chr21	38072283	-	83
chr20	14516172	-	chrX	31186363	+	95
chr21	27632933	+	chr21	28242957	+	61
chr22	18769955	+	chr22	25016254	+	2
chr22	18847167	-	chr22	21469165	-	2
chr22	18871112	+	chr22	20650878	-	4
chr22	22703399	-	chr22	22752645	+	2
chr22	22707587	+	chr22	22730594	-	3
chr22	23020852	-	chr22	23042593	+	2
chr22	23241562	-	chr22	23247168	+	2
chr22	23681131	-	chr22	25065214	+	2
chr22	23960001	+	chr22	23964328	-	2
chr22	24025658	+	chr22	24027540	-	8
chr22	24274190	+	chr22	24311319	-	8
chr22	25685109	+	chr22	25980531	-	2
chr22	25685396	-	chr22	25982673	+	3
chr22	27168120	+	chr22	27169820	-	8
chr22	31776417	+	chr22	31780707	-	2
chr22	37636549	+	chr22	37636702	-	2
chr22	37744458	+	chr22	37750029	-	12
chr22	39294127	+	chr22	39298697	-	2
chr22	43101404	+	chr22	43102178	-	3
chr22	46014050	-	chr22	47986659	-	4
chr22	46014101	+	chr22	47986775	+	6
chr22	49622600	-	chr22	49624427	+	2
chr3	192787997	+	chr10	12289492	+	10
chr4	8439592	-	chr10	8755573	-	17
chr4	8392189	+	chr13	69808981	-	106
chr4	11972831	+	chr13	112724014	+	109
chr4	25769580	+	chr15	85262527	-	72
chr4	28724321	+	chr15	96321963	+	74
chr4	28359289	+	chr20	14477254	-	72
chr4	8151632	-	chr21	22887551	+	51
chr4	28437505	-	chr21	42372128	-	28
chr4	11812725	+	chr4	28650680	+	25
chr4	12727575	+	chr4	23846435	-	13
chr4	8375683	-	chr6	114199524	+	58
chr4	9147052	+	chr9	78897304	-	28
chr4	28195353	-	chrX	31187928	-	100
chr5	39841749	+	chr10	10533084	+	107
chr5	41960481	+	chr10	8061313	-	70
chr5	42055004	-	chr10	8040088	-	42
chr5	42177968	+	chr10	10513276	-	66
chr5	42182323	+	chr10	10507508	-	117
chr5	1229083	-	chr21	28596240	+	104
chr5	21496348	-	chr21	42882163	+	17
chr5	39837920	-	chr21	42732152	+	77
chr5	41500825	-	chr21	27526160	+	176
chr5	134210061	-	chr21	38116619	+	10
chr5	291385	-	chr5	24665009	-	53
chr5	21480280	-	chr5	39440945	+	15
chr5	42166008	+	chr5	42167769	-	65
chr5	41732208	-	chr6	114212563	+	88
chr5	1056154	+	chr9	87106805	-	134
chr6	46216905	-	chr10	8988040	+	72
chr6	114178959	-	chr10	10514999	+	225
chr6	45919036	+	chr13	58570015	-	55
chr6	46415774	-	chr13	76558009	+	76
chr6	114148131	+	chr13	109805799	-	32
chr6	46271489	+	chr15	91537524	+	25
chr6	114125204	-	chr21	42148197	-	70
chr7	118067	-	chr7	182806	+	3
chr7	945090	-	chr7	946291	+	2
chr7	1185136	+	chr7	1187657	-	7
chr7	2117092	-	chr7	2118638	+	2
chr7	2186639	+	chr7	42400297	+	2
chr7	2576224	+	chr7	2716271	+	2
chr7	4536984	+	chr7	9661491	-	2
chr7	5022775	-	chr7	5770873	-	3
chr7	5023074	+	chr7	5771080	+	4
chr7	5172425	+	chr7	5873794	+	3
chr7	5319985	+	chr7	63085396	-	2
chr7	5325860	+	chr7	57013737	+	2
chr7	5346512	-	chr7	63026909	+	3
chr7	5532951	-	chr7	5534129	-	2
chr7	5923309	+	chr7	97616739	+	4
chr7	5923324	-	chr7	97616591	-	2
chr7	5947429	+	chr7	6856794	+	5
chr7	5996392	+	chr7	6807726	+	3
chr7	12628451	+	chr7	12634998	-	2
chr7	13585692	+	chr7	13591236	-	9
chr7	13762889	+	chr7	13763013	-	2
chr7	17300913	+	chr7	20003890	+	2
chr7	20545992	+	chr7	20545604	-	2
chr7	20748851	+	chr7	20753571	-	21
chr7	22069116	-	chr7	22071593	-	3
chr7	22434849	+	chr7	22436760	-	18
chr7	22548945	+	chr7	35100090	-	2
chr7	22560796	+	chr7	35110202	-	2
chr7	24038229	+	chr7	24040071	-	12
chr7	28214298	+	chr7	28214937	-	2
chr7	29415300	+	chr7	29415581	-	2
chr7	29709556	+	chr7	32783493	+	2
chr7	29726317	-	chr7	32766618	-	2
chr7	30369726	+	chr7	30369726	+	2
chr7	31689328	-	chr7	104369129	-	2
chr7	32390220	+	chr7	32393108	-	15
chr7	32713673	+	chr7	35048172	-	2
chr7	32816515	+	chr7	34906131	-	2
chr7	32819622	+	chr7	34909688	-	2
chr7	32834090	-	chr7	34933152	+	3
chr7	32834229	+	chr7	34933209	-	3
chr7	32894465	+	chr7	34959862	+	2
chr7	33002903	-	chr7	55792281	-	2
chr7	33898866	+	chr7	33899328	-	3
chr7	34087435	+	chr7	70786836	-	2
chr7	35090119	+	chr7	102805581	-	2
chr7	35090134	-	chr7	102805745	+	2
chr7	35231377	-	chr7	89743083	-	3
chr7	38389265	-	chr7	38398476	+	2
chr7	38451214	+	chr7	54196368	-	15
chr7	40761651	-	chr7	62976878	-	4
chr7	40879381	+	chr7	40880496	+	7
chr7	40879384	-	chr7	40880480	-	11
chr7	44019215	-	chr7	102173582	+	2
chr7	44045309	-	chr7	76684009	-	2
chr7	55286822	+	chr7	55289056	-	25
chr7	55742149	+	chr7	56490646	-	2
chr7	55832643	-	chr7	56084854	-	2
chr7	56047693	+	chr7	56048107	-	2
chr7	56735274	+	chr7	63701358	+	2
chr7	56744877	+	chr7	63685228	+	2
chr7	56762036	+	chr7	56769941	-	9
chr7	57094007	-	chr7	63010885	-	2
chr7	57121863	+	chr7	62977015	+	2
chr7	57196602	-	chr7	57519013	-	6
chr7	57223519	+	chr7	57541493	+	4
chr7	57477897	-	chr7	63635844	+	2
chr7	57541027	+	chr7	63685110	-	2
chr7	57546164	+	chr7	57552108	-	3
chr7	57724411	-	chr7	57869924	-	3
chr7	57957715	+	chr7	57959370	-	7
chr7	58004528	+	chr7	100723295	+	2
chr7	61739482	+	chr7	61779429	-	2
chr7	61967356	-	chr7	61970437	+	35
chr7	61968603	-	chr7	61971261	+	41
chr7	61968731	+	chr7	61968840	-	6
chr7	61969287	+	chr7	61975373	-	2
chr7	61969301	-	chr7	61973241	+	4
chr7	61969318	+	chr7	61972961	-	6
chr7	61969716	+	chr7	61970195	-	158
chr7	61970245	-	chr7	61971253	+	2
chr7	62680604	-	chr7	62983270	-	2
chr7	63123253	+	chr7	100290295	-	15
chr7	64315727	+	chr7	64318119	-	3
chr7	66584994	-	chr7	72156944	-	2
chr7	66586600	+	chr7	72155754	+	2
chr7	66611925	-	chr7	72129159	-	2
chr7	66612916	+	chr7	72130346	+	2
chr7	66633146	-	chr7	72109081	-	2
chr7	66647521	+	chr7	72094661	+	2
chr7	66681696	-	chr7	72061922	-	4
chr7	66697507	+	chr7	66699404	-	2
chr7	66718693	+	chr7	72026296	+	2
chr7	66722558	+	chr7	72022352	+	2
chr7	69371411	+	chr7	69572464	+	2
chr7	69487804	-	chr7	69572613	-	5
chr7	70421036	+	chr7	70438881	+	2
chr7	70426183	-	chr7	70438910	-	11
chr7	71211960	+	chr7	71212975	-	8
chr7	73146464	+	chr7	88818813	-	9
chr7	73764464	+	chr7	93102031	-	7
chr7	73828502	+	chr7	73831429	-	2
chr7	80801663	+	chr7	80802110	-	2
chr7	88377548	+	chr7	108055191	-	2
chr7	88836395	+	chr7	93122969	-	3
chr7	90928077	-	chr7	93124688	+	5
chr7	91080692	+	chr7	92986422	-	3
chr7	91093702	-	chr7	93051930	+	9
chr7	91121614	+	chr7	93109701	+	5
chr7	96475948	+	chr7	96482058	-	2
chr7	100556063	+	chr7	100607212	-	6
chr9	80825503	-	chr13	76432707	+	99
chr9	86077952	+	chr13	90758635	-	98
chr9	80822114	-	chr15	85669272	-	39
chr9	80826628	+	chr15	85669603	+	18
chr9	80886038	-	chr15	85669248	-	138
chr9	80886246	-	chr15	85669604	+	11
chr9	80886534	+	chr15	85669575	+	30
chr9	86973631	+	chr15	99469413	-	94
chr9	87118604	-	chr15	96317269	+	56
chr9	79673920	-	chr16	58345217	-	149
chr9	80815539	+	chr16	58345037	+	43
chr9	80816791	-	chr16	62976751	-	43
chr9	80825340	+	chr16	56313858	+	83
chr9	80826614	+	chr16	70276241	+	43
chr9	80886081	-	chr16	56313846	+	8
chr9	79467753	+	chr21	27839446	+	106
chr9	86016146	-	chr21	28585313	-	61
chr9	86040916	-	chr21	43100300	-	87
chr9	79347773	+	chr9	84175162	-	89
chr9	80822293	+	chr9	80886484	+	7
chr9	80825102	-	chr9	80886080	-	88
chr9	83486840	-	chr9	83498386	-	10
chr9	80815318	-	chrX	31180193	+	8
chr9	80815551	+	chrX	31180387	-	32
chr9	80822115	-	chrX	31180085	+	54
chr9	80886154	-	chrX	31179869	-	87
chr9	80886421	+	chrX	31180303	+	104
chr9	80886438	+	chrX	31179609	-	233
chr1	171045154	-	chr12	83591488	+	193
chr1	171814466	-	chr12	66053134	+	100
chr1	171816955	+	chr12	70805434	+	109
chr1	172372758	-	chr12	69345534	-	102
chr1	172392071	+	chr12	69081628	-	101
chr1	172778260	+	chr12	69191031	-	33
chr1	178297811	-	chr12	69287274	+	94
chr1	181839347	-	chr12	70799815	-	116
chr1	182317195	-	chr12	78898704	+	105
chr1	182319134	+	chr12	95458758	+	393
chr1	183844726	+	chr12	93039062	+	103
chr1	183849795	-	chr12	92863942	-	64
chr1	184116343	+	chr12	75783808	+	135
chr1	185683344	-	chr12	75744332	+	92
chr1	185810694	+	chr12	84371091	-	123
chr1	185888078	-	chr12	58025248	+	64
chr1	185994474	-	chr12	78937364	+	117
chr1	186005878	+	chr12	69778852	+	30
chr1	186034450	+	chr12	84100098	-	76
chr1	186036580	-	chr12	84315236	+	36
chr1	186280847	-	chr12	83938244	-	19
chr1	186398167	-	chr12	78928701	-	82
chr1	186410010	+	chr12	70524952	-	45
chr1	186597024	-	chr12	70575671	+	70
chr1	186639175	+	chr12	69428589	-	25
chr1	186673283	-	chr12	92924666	+	113
chr1	188272496	-	chr12	95446967	-	198
chr1	188320573	+	chr12	60549547	+	94
chr1	188340299	+	chr12	70655254	-	11
chr1	188369817	+	chr12	69092014	+	136
chr1	188377587	-	chr12	95463888	+	158
chr1	188379022	-	chr12	95463599	-	109
chr1	188379591	-	chr12	70877065	+	85
chr1	188382067	+	chr12	70296331	-	69
chr1	188383181	+	chr12	82575401	+	43
chr1	188386300	+	chr12	95449113	-	294
chr1	188539045	-	chr12	83702567	+	69
chr1	188626459	+	chr12	84380515	-	78
chr1	188640368	+	chr12	58923910	+	109
chr1	188641432	+	chr12	70863964	-	7
chr1	188698638	+	chr12	69306555	+	116
chr1	188701170	-	chr12	69445391	+	11
chr1	188831742	+	chr12	69410816	-	67
chr1	188833509	-	chr12	60541347	-	73
chr1	188934063	+	chr12	69383116	+	28
chr1	188937665	+	chr12	71283356	-	109
chr1	188993823	-	chr12	83573888	-	82
chr1	194786593	-	chr12	69082574	-	19
chr10	3294114	+	chr12	83701257	-	47
chr10	7951479	+	chr12	69777869	+	67
chr10	8015395	-	chr12	84101005	+	87
chr10	8061093	+	chr12	75593983	+	42
chr10	8221839	+	chr12	74324418	+	49
chr10	8391892	-	chr12	69444307	+	34
chr10	8414008	+	chr12	95528620	-	112
chr10	8472556	+	chr12	58026616	-	44
chr10	8481286	-	chr12	74255513	-	28
chr10	8483956	-	chr12	75593568	-	106
chr10	8494855	+	chr12	69392546	+	26
chr10	8727643	+	chr12	82511238	-	62
chr10	8755509	-	chr12	75626397	+	65
chr10	8761126	-	chr12	74255210	+	84
chr10	8882453	+	chr12	66249305	+	91
chr10	8917482	+	chr12	71242780	+	78
chr10	10514660	-	chr12	83583368	-	24
chr10	10514661	-	chr12	71622326	+	14
chr10	10518524	+	chr12	75601526	-	68
chr10	10579899	-	chr12	69410799	+	115
chr10	10651713	+	chr12	58031546	+	102
chr10	10720142	-	chr12	69330490	+	25
chr10	10771698	+	chr12	83958324	+	7
chr10	10894636	-	chr12	71622322	+	16
chr10	10894758	+	chr12	71622198	-	7
chr10	10894767	-	chr12	71626917	-	76
chr10	10894769	-	chr12	78862502	+	17
chr10	10894895	+	chr12	83948303	+	9
chr10	10894959	+	chr12	74462643	+	9
chr10	12472385	-	chr12	65867420	-	95
chr10	12568035	+	chr12	69427658	+	29
chr12	55381666	-	chr12	74266232	+	138
chr12	55401968	+	chr12	65029887	+	111
chr12	58006653	-	chr12	74429450	-	151
chr12	58010169	-	chr12	58141148	-	11
chr12	58014359	+	chr12	58152021	+	41
chr12	58015973	-	chr12	95449934	-	35
chr12	58020150	+	chr12	93112168	-	26
chr12	58028102	+	chr12	58029232	-	258
chr12	58033548	+	chr12	71695939	+	307
chr12	58051273	-	chr12	60552191	+	148
chr12	58056334	+	chr12	69657625	-	26
chr12	58059170	+	chr12	66027487	+	17
chr12	58122483	-	chr12	84157946	+	108
chr12	58163933	+	chr12	73381320	+	432
chr12	60540380	-	chr12	75549258	-	448
chr12	60542483	+	chr12	71476873	-	13
chr12	65025875	-	chr12	67064710	+	134
chr12	65861907	-	chr12	92847293	-	139
chr12	66006335	-	chr12	69484762	+	117
chr12	66042652	-	chr12	69096905	+	46
chr12	66205656	-	chr12	91671361	+	47
chr12	66527719	+	chr12	66529873	-	107
chr12	67061256	-	chr12	80042658	-	127
chr12	69077570	-	chr12	82462394	-	193
chr12	69077741	-	chr12	84412312	+	98
chr12	69216578	-	chr12	73375813	+	13
chr12	69257074	-	chr12	84247022	-	71
chr12	69257840	+	chr12	71498522	-	121
chr12	69307920	-	chr12	75726115	-	83
chr12	69340413	+	chr12	69477686	+	42
chr12	69392154	+	chr12	75720171	-	33
chr12	69439438	+	chr12	93047146	-	9
chr12	69441099	-	chr12	93097023	+	17
chr12	69448486	+	chr12	93021540	-	112
chr12	69459415	+	chr12	69665204	-	16
chr12	69485781	+	chr12	69790924	+	218
chr12	69507179	-	chr12	95616622	+	226
chr12	69789045	-	chr12	83546636	-	159
chr12	70594929	+	chr12	70597571	-	82
chr12	70756836	-	chr12	74480953	+	134
chr12	70971165	-	chr12	71451552	-	49
chr12	71497585	-	chr12	82519314	+	87
chr12	71622110	-	chr12	78862303	-	65
chr12	71622117	-	chr12	71627145	+	20
chr12	71622339	+	chr12	83583510	+	35
chr12	71627143	+	chr12	78862504	+	90
chr12	71685079	-	chr12	74493140	+	143
chr12	73362556	-	chr12	74478620	-	376
chr12	74318663	-	chr12	74971673	+	16
chr12	74343461	+	chr12	95318704	+	163
chr12	74462580	+	chr12	83948128	-	45
chr12	75688469	-	chr12	82694275	+	99
chr12	75835312	-	chr12	83962181	+	67
chr12	75886131	+	chr12	75949352	+	92
chr12	79125386	+	chr12	82467058	-	74
chr12	79874987	+	chr12	93158340	+	234
chr12	82470508	+	chr12	93103798	+	44
chr12	83578746	-	chr12	83785563	-	67
chr12	83581903	-	chr12	92990924	-	44
chr12	83966000	+	chr12	84056226	+	78
chr12	84139151	+	chr12	92922068	-	114
chr12	84391743	-	chr12	95456192	-	25
chr12	93093073	-	chr12	93097037	-	13
chr12	95531850	+	chr12	95588266	+	60
chr12	65915386	+	chr13	91256381	+	71
chr12	69379187	-	chr13	69884096	+	16
chr12	69448917	-	chr13	89477094	-	133
chr12	69463782	-	chr13	74160978	-	49
chr12	70864106	+	chr13	89286886	-	63
chr12	70866040	+	chr13	69928390	+	19
chr12	75558310	+	chr13	74907749	+	104
chr12	75660694	-	chr13	75372986	+	43
chr12	83569022	+	chr13	62122599	-	47
chr12	83907208	-	chr13	89294943	+	63
chr12	93050184	+	chr13	89454083	+	22
chr12	95442777	+	chr13	80040960	-	17
chr12	58008430	-	chr15	99490437	+	34
chr12	58923955	+	chr15	85669273	-	149
chr12	65952863	-	chr15	99917530	+	10
chr12	65999752	+	chr15	91540134	-	67
chr12	66050870	-	chr15	98966898	-	50
chr12	66050908	-	chr15	98966953	+	13
chr12	66577054	+	chr15	73952302	-	126
chr12	69083042	+	chr15	93389659	+	60
chr12	69264050	+	chr15	92564452	+	80
chr12	69309102	+	chr15	99106807	-	98
chr12	69621899	+	chr15	96247766	+	11
chr12	70397662	-	chr15	99202723	+	123
chr12	71294917	+	chr15	85326599	-	93
chr12	74459665	-	chr15	92303229	-	95
chr12	75569210	+	chr15	85476386	-	107
chr12	75588385	+	chr15	85611826	+	16
chr12	75890375	-	chr15	98967640	-	122
chr12	79738259	-	chr15	99136082	+	18
chr12	83989029	-	chr15	92404960	+	10
chr12	84156180	-	chr15	99321333	+	126
chr12	84370855	+	chr15	99663236	-	111
chr12	92933172	-	chr15	92736308	+	92
chr12	58147860	-	chr16	62853038	+	162
chr12	58923657	-	chr16	56313826	+	33
chr12	84390922	+	chr16	63007497	+	96
chr12	78854412	-	chr17	35633727	-	202
chr12	58929957	-	chr20	456749	+	73
chr12	69134609	-	chr20	14530513	+	66
chr12	70763989	-	chr20	14449204	-	31
chr12	70944923	+	chr20	410048	-	27
chr12	78880487	-	chr20	1293639	-	67
chr12	83572940	+	chr20	14401459	+	68
chr12	84088865	-	chr20	14467159	-	11
chr12	84262289	+	chr20	14469965	-	33
chr12	84262431	+	chr20	14471106	+	18
chr12	84262465	+	chr20	14470123	+	7
chr12	84308156	+	chr20	14545364	+	31
chr12	66044435	+	chr21	27510109	-	86
chr12	66051542	-	chr21	28214037	+	61
chr12	67861322	-	chr21	43109240	+	136
chr12	69082735	+	chr21	28703564	+	17
chr12	69403504	+	chr21	27905273	-	51
chr12	69436859	+	chr21	27845341	-	56
chr12	70863895	-	chr21	42620960	-	39
chr12	70871805	-	chr21	27853326	+	61
chr12	74246628	+	chr21	27886612	-	105
chr12	75652810	+	chr21	43053103	-	66
chr12	75842662	-	chr21	42168566	+	105
chr12	78856376	+	chr21	27980502	-	58
chr12	83549695	+	chr21	28724843	+	49
chr12	83565784	-	chr21	42717498	-	55
chr12	83966571	-	chr21	27837537	-	112
chr12	84192845	-	chr21	42938724	-	24
chr12	92885382	+	chr21	27897464	+	119
chr12	93016668	+	chr21	28421954	-	27
chr12	58923254	-	chrX	31167667	-	349
chr12	79110757	-	chrX	31177538	-	64
chr2	156978409	+	chr12	69246298	-	28
chr2	158645387	-	chr12	82478710	+	119
chr3	192786917	-	chr12	69157849	-	95
chr3	195668849	+	chr12	84406927	+	41
chr3	195683651	-	chr12	75552117	+	60
chr3	195709588	+	chr12	58010062	-	15
chr3	196713974	-	chr12	60542146	+	57
chr4	8439718	+	chr12	75626358	+	15
chr4	8605482	-	chr12	69546485	+	129
chr4	8613498	+	chr12	69248294	+	115
chr4	9031183	-	chr12	84377659	-	15
chr4	9119701	+	chr12	69450387	+	11
chr4	9394394	+	chr12	70792506	-	22
chr4	11779642	-	chr12	78945350	+	72
chr4	11842090	+	chr12	75916958	-	43
chr4	11888364	-	chr12	69199663	+	122
chr4	12546071	-	chr12	70819984	+	29
chr4	24201352	-	chr12	95495107	-	109
chr4	26761140	-	chr12	82662356	-	78
chr4	26795933	+	chr12	75617764	-	12
chr4	26795937	+	chr12	75617837	+	74
chr4	28624610	-	chr12	69463754	+	108
chr4	28628166	+	chr12	82472975	-	91
chr5	1336179	+	chr12	58007672	-	103
chr5	39427024	-	chr12	70757196	+	120
chr5	41764066	+	chr12	83576143	-	8
chr5	42165220	+	chr12	70430576	+	65
chr5	42175541	-	chr12	83812522	+	45
chr6	45912857	-	chr12	95434142	-	51
chr6	114124711	+	chr12	70302190	+	87
chr6	114132167	+	chr12	69082113	-	43
chr6	114146273	-	chr12	92886290	-	50
chr9	78918756	+	chr12	95570537	-	65
chr9	80547704	-	chr12	95483648	-	74
chr9	80821992	+	chr12	70865772	-	12
chr9	80825331	+	chr12	58923801	+	29
chr9	80886088	-	chr12	58923803	+	9
chr9	82566190	-	chr12	70708073	+	32
chr9	82662699	-	chr12	93030054	-	101
chr9	82712698	+	chr12	69244499	-	25
chr9	86676382	-	chr12	58139404	+	95
chr9	86935069	-	chr12	84312286	+	60
chr9	86967052	+	chr12	58025027	-	86
chr9	87233048	+	chr12	79823345	-	25	1

## Sheet: GOT3 (DR)
chrom1	start1	strand1	chrom2	start2	strand2	nreads
chr1	17051739	-	chr1	234912187	-	19
chr1	25158696	+	chr1	25161509	-	16
chr1	30030092	+	chr1	30030359	-	19
chr1	56401298	+	chr1	56400790	-	20
chr1	58743930	+	chr1	58744822	-	17
chr1	145092977	+	chr1	145097081	-	71
chr1	166228196	+	chr1	241735204	-	58
chr1	166576268	-	chr1	166894129	-	58
chr1	166578125	+	chr1	215651513	-	49
chr1	166907103	+	chr1	229576883	-	73
chr1	168406103	+	chr1	168953531	+	82
chr1	169850277	+	chr1	169849753	-	48
chr1	171836144	-	chr1	228141861	-	15
chr1	171967448	+	chr1	201104059	-	35
chr1	171971321	-	chr1	201068358	+	31
chr1	171971476	+	chr1	171971982	-	18
chr1	174215339	+	chr1	240357764	-	96
chr1	174406416	-	chr1	222910200	-	19
chr1	175200583	+	chr1	175201940	+	19
chr1	176478233	+	chr1	176478773	-	18
chr1	178121337	+	chr1	178265263	-	39
chr1	182586516	-	chr1	187484025	+	167
chr1	182685567	-	chr1	201105159	+	33
chr1	182698124	+	chr1	228347694	+	46
chr1	186264716	+	chr1	200708994	+	43
chr1	186268284	-	chr1	240348223	-	35
chr1	186494782	+	chr1	241389483	+	32
chr1	186601329	-	chr1	201138448	+	60
chr1	186673155	+	chr1	247386043	+	23
chr1	186742434	+	chr1	241389632	-	28
chr1	186826118	+	chr1	186826391	+	20
chr1	187464853	+	chr1	187466748	+	123
chr1	193651378	-	chr1	226937798	-	164
chr1	193854860	+	chr1	200764601	-	187
chr1	200653712	-	chr1	240348519	+	48
chr1	201053471	+	chr1	201120638	+	40
chr1	201104090	-	chr1	228142116	-	30
chr1	201104774	-	chr1	228347243	-	28
chr1	201104777	-	chr1	228142665	+	36
chr1	201105762	+	chr1	228140393	+	26
chr1	201247772	-	chr1	248257475	+	51
chr1	201441631	-	chr1	227611019	+	64
chr1	201581916	+	chr1	233044146	+	47
chr1	201727397	-	chr1	219378833	+	24
chr1	201738407	+	chr1	209758302	-	20
chr1	201798158	-	chr1	219306400	-	17
chr1	201846737	+	chr1	230353825	+	119
chr1	202219261	-	chr1	218011419	-	29
chr1	202266086	+	chr1	215662216	-	33
chr1	211419401	+	chr1	218055893	+	35
chr1	215019699	-	chr1	215052873	+	15
chr1	215059200	+	chr1	244732885	+	36
chr1	215334618	+	chr1	238181732	-	22
chr1	215712587	+	chr1	244851096	-	33
chr1	221218438	+	chr1	246913714	-	40
chr1	226984518	+	chr1	241773384	+	213
chr1	227602093	-	chr1	227602313	+	31
chr1	227651126	-	chr1	247868460	+	70
chr1	228024114	+	chr1	228024405	-	63
chr1	228137836	+	chr1	228350558	-	36
chr1	230107567	-	chr1	230107838	+	31
chr1	241149874	+	chr1	241150185	-	28
chr1	241360560	+	chr1	241360852	-	75
chr1	241586244	+	chr1	241586488	-	84
chr1	243964313	-	chr1	246846289	-	50
chr1	245277277	-	chr1	247934276	-	43
chr1	246981230	-	chr1	246981380	+	46
chr1	246981350	+	chr1	246981244	-	18
chr1	247305570	-	chr1	248551761	+	64
chr1	247850479	+	chr1	247856508	-	68
chr1	248051502	+	chr1	248057638	-	35
chr1	165967688	-	chr12	40067728	+	90
chr1	166456474	-	chr12	45107392	-	77
chr1	166495434	+	chr12	40937431	-	78
chr1	166664275	-	chr12	69566184	-	64
chr1	166852292	+	chr12	40911088	-	61
chr1	167809734	-	chr12	77220467	-	35
chr1	168211623	-	chr12	41317761	+	15
chr1	169140955	-	chr12	70183431	+	116
chr1	169685137	+	chr12	44993692	+	62
chr1	171398456	-	chr12	62517841	-	16
chr1	171810107	-	chr12	40940721	-	54
chr1	171880331	-	chr12	71048693	+	34
chr1	172000431	-	chr12	51483523	+	20
chr1	173093137	+	chr12	71022598	+	59
chr1	173376212	-	chr12	72949935	+	84
chr1	173449498	+	chr12	40960227	+	77
chr1	175918116	-	chr12	73088185	-	31
chr1	178269013	-	chr12	70193031	-	19
chr1	182622245	+	chr12	63535161	-	20
chr1	182820269	-	chr12	77901503	+	15
chr1	183091308	+	chr12	66875681	+	62
chr1	185380731	-	chr12	73090235	+	46
chr1	186743651	-	chr12	73219676	-	35
chr1	201068002	-	chr12	69190025	-	19
chr1	201104193	+	chr12	69264661	+	24
chr1	201107724	-	chr12	69202995	+	43
chr1	201126878	-	chr12	71263359	+	38
chr1	201344642	+	chr12	69589631	+	32
chr1	201861991	+	chr12	68195495	+	46
chr1	215735199	+	chr12	60654738	+	29
chr1	228140003	-	chr12	69264542	+	35
chr1	231765782	-	chr12	66569641	+	31
chr1	238532265	-	chr12	67630602	+	66
chr1	238650379	+	chr12	58514926	+	57
chr1	240760897	+	chr12	68610301	-	41
chr1	240825174	-	chr12	57823750	-	42
chr1	241617102	-	chr12	39269789	-	62
chr1	241628114	+	chr12	69579126	+	40
chr1	244312399	-	chr12	69335400	-	18
chr1	244385747	+	chr12	41176040	-	62
chr1	246976177	+	chr12	77237219	-	89
chr1	247105321	-	chr12	41252089	+	80
chr1	247147979	+	chr12	40948988	+	82
chr1	247341304	-	chr12	71580258	-	108
chr1	247342359	+	chr12	59601911	-	36
chr1	168415290	-	chr13	94592185	+	127
chr1	175919485	+	chr13	94459366	-	50
chr1	229623704	+	chr13	94371620	-	38
chr1	171836117	-	chrX	22076074	-	19
chr1	171984956	+	chrX	21397848	+	44
chr1	172061784	+	chrX	21452684	+	34
chr1	182627780	+	chrX	28893482	+	41
chr1	186673775	-	chrX	28906952	-	22
chr1	201104265	+	chrX	22082178	+	20
chr1	201104930	+	chrX	22075917	+	25
chr1	201105400	-	chrX	28856347	-	32
chr1	230264264	-	chrX	10689438	+	38
chr1	241756988	-	chrX	22085400	+	24
chr1	247341702	+	chrX	6754786	+	69
chr1	247342615	-	chrX	10917972	+	16
chr1	247527922	+	chrX	20991581	-	16
chr1	247545087	-	chrX	21012265	+	30
chr1	248248209	-	chrX	6470481	+	28
chr1	248480313	-	chrX	9583695	+	36
chr12	37869567	+	chr12	43606262	+	22
chr12	38497443	-	chr12	58809891	-	19
chr12	38611334	-	chr12	69646315	+	15
chr12	38888213	-	chr12	69952730	+	80
chr12	38889560	+	chr12	68817980	-	16
chr12	39216947	-	chr12	60077752	+	102
chr12	39272988	+	chr12	71384055	+	86
chr12	39380013	-	chr12	58880404	-	26
chr12	40387945	-	chr12	40497633	+	49
chr12	40676246	+	chr12	40735455	-	71
chr12	40803809	+	chr12	41265542	+	56
chr12	41052052	-	chr12	71581745	-	20
chr12	41143322	+	chr12	41143073	-	34
chr12	41259311	+	chr12	41259885	-	70
chr12	41378365	+	chr12	73019250	+	41
chr12	41395834	-	chr12	74063011	-	142
chr12	41395852	+	chr12	73298969	-	127
chr12	41401506	+	chr12	78073622	-	79
chr12	41520828	+	chr12	76714168	-	50
chr12	42238072	+	chr12	42238877	-	18
chr12	42338871	-	chr12	58362502	+	59
chr12	43348448	+	chr12	43577654	-	16
chr12	43977470	+	chr12	43979549	-	47
chr12	45170957	+	chr12	60642089	-	70
chr12	45194177	+	chr12	60620209	-	15
chr12	49592351	-	chr12	57633927	+	210
chr12	49648348	-	chr12	69269474	+	49
chr12	49656658	+	chr12	49659647	-	82
chr12	49774037	+	chr12	66386773	-	300
chr12	51308294	-	chr12	66412017	+	190
chr12	51389002	+	chr12	66795022	-	23
chr12	51389157	-	chr12	57634209	-	175
chr12	51401563	-	chr12	64793949	+	48
chr12	51545898	+	chr12	71844154	-	115
chr12	51545944	+	chr12	66210523	+	99
chr12	57610455	-	chr12	66156039	-	40
chr12	57967861	-	chr12	59470155	-	113
chr12	58028040	+	chr12	58029243	-	26
chr12	58136260	-	chr12	68237074	-	209
chr12	58213689	+	chr12	68529313	+	186
chr12	58296195	-	chr12	68278991	+	254
chr12	58304051	+	chr12	71626440	+	211
chr12	58343654	-	chr12	69340261	+	159
chr12	58883364	+	chr12	71580470	-	16
chr12	60071547	-	chr12	68832678	+	90
chr12	60088175	+	chr12	67208916	-	187
chr12	60657308	+	chr12	68601413	-	16
chr12	62109275	-	chr12	66399197	+	107
chr12	62110567	+	chr12	67565823	-	79
chr12	62112090	+	chr12	71843662	-	165
chr12	62112103	+	chr12	66401204	+	20
chr12	62112123	+	chr12	66400837	-	17
chr12	62116066	-	chr12	66875965	+	208
chr12	62434033	-	chr12	71648966	-	18
chr12	62624387	-	chr12	65843565	+	367
chr12	62657859	-	chr12	62663897	+	76
chr12	62657862	-	chr12	62661064	-	110
chr12	62657985	-	chr12	64867250	+	287
chr12	62658178	+	chr12	63308857	+	66
chr12	62658258	+	chr12	64866581	+	372
chr12	62661061	-	chr12	64858224	-	134
chr12	62661184	+	chr12	62663857	+	90
chr12	62661205	+	chr12	62664229	-	144
chr12	62661344	+	chr12	67673407	-	245
chr12	62661644	-	chr12	64868484	-	254
chr12	62661644	-	chr12	64865242	+	21
chr12	62661969	-	chr12	64860728	-	272
chr12	62662919	+	chr12	64865425	-	266
chr12	62663323	-	chr12	62667465	-	210
chr12	62664229	-	chr12	64858224	-	133
chr12	62667716	+	chr12	64865596	+	80
chr12	62667774	+	chr12	67666236	+	209
chr12	62680384	-	chr12	64865476	-	17
chr12	62681063	+	chr12	68841260	+	264
chr12	63308708	-	chr12	71118536	-	764
chr12	63308750	-	chr12	64866510	+	86
chr12	63309047	+	chr12	71118962	-	280
chr12	63309100	+	chr12	67665917	-	260
chr12	63309136	+	chr12	64865565	-	36
chr12	63403079	-	chr12	66680558	-	231
chr12	63429294	+	chr12	63722768	+	268
chr12	63487700	-	chr12	63488662	-	236
chr12	63489207	+	chr12	67673884	+	256
chr12	63562375	-	chr12	69829011	+	225
chr12	64371241	-	chr12	64865353	-	249
chr12	64401085	+	chr12	64406434	-	145
chr12	64410013	+	chr12	67669185	+	151
chr12	64410424	-	chr12	64868397	-	215
chr12	64410628	-	chr12	70561252	-	70
chr12	64410653	+	chr12	64868455	-	243
chr12	64413023	-	chr12	69198082	-	152
chr12	64413865	-	chr12	67668262	-	52
chr12	64696094	-	chr12	77964071	-	492
chr12	64701084	+	chr12	71424482	+	472
chr12	64724478	-	chr12	69708668	+	68
chr12	64859274	+	chr12	64868568	-	20
chr12	64859366	+	chr12	64865241	+	205
chr12	64860200	+	chr12	64861667	+	267
chr12	64863160	-	chr12	67669206	-	189
chr12	64865040	-	chr12	71119353	+	789
chr12	64865237	+	chr12	64868679	+	425
chr12	64865495	-	chr12	67666200	+	240
chr12	64865781	+	chr12	67666108	+	51
chr12	64865789	+	chr12	64867243	+	36
chr12	64866246	-	chr12	71120573	-	226
chr12	64868693	+	chr12	71119403	+	71
chr12	65112677	-	chr12	69948614	-	197
chr12	65148393	+	chr12	70305261	+	762
chr12	65154268	-	chr12	76480300	-	99
chr12	65191782	+	chr12	73298649	+	66
chr12	65444718	+	chr12	74652311	-	696
chr12	65522878	+	chr12	69899357	+	56
chr12	65712463	-	chr12	73541011	+	108
chr12	65781528	-	chr12	77161072	-	258
chr12	65837130	-	chr12	72900578	-	347
chr12	66151689	-	chr12	74640556	+	723
chr12	66198003	+	chr12	71844402	-	200
chr12	66210372	-	chr12	71845138	+	117
chr12	66210488	+	chr12	71844272	+	20
chr12	66239491	+	chr12	76257464	+	641
chr12	66319802	-	chr12	66591776	-	240
chr12	66350391	+	chr12	77286657	-	276
chr12	66400837	-	chr12	71843860	+	198
chr12	66400837	-	chr12	66401090	-	24
chr12	66400855	-	chr12	66401198	+	19
chr12	66495369	-	chr12	69795123	+	76
chr12	66527653	+	chr12	66529876	-	66
chr12	66799116	+	chr12	71573784	+	501
chr12	66806431	-	chr12	76089140	-	555
chr12	66856777	-	chr12	74587657	-	531
chr12	66893736	+	chr12	66895600	+	184
chr12	66905268	+	chr12	73313181	-	524
chr12	67234870	+	chr12	71844274	+	260
chr12	67908288	+	chr12	73433996	+	109
chr12	67932280	+	chr12	71857794	-	40
chr12	68091167	-	chr12	71856830	+	33
chr12	68144948	+	chr12	68797550	-	152
chr12	68164635	-	chr12	70610082	-	49
chr12	68500313	+	chr12	77126219	+	96
chr12	68512322	-	chr12	74126738	+	76
chr12	68512525	+	chr12	76722599	+	59
chr12	68588567	+	chr12	76609026	+	39
chr12	68632316	-	chr12	70339559	+	291
chr12	69070341	-	chr12	73082250	+	35
chr12	69175560	-	chr12	71236911	-	335
chr12	69240103	-	chr12	69509740	+	62
chr12	69255817	+	chr12	69256517	-	814
chr12	69279671	+	chr12	73620381	+	652
chr12	69431921	-	chr12	77657672	+	206
chr12	69473694	-	chr12	70094185	+	38
chr12	69594124	-	chr12	71555816	+	16
chr12	69661148	-	chr12	69960121	+	188
chr12	69676759	+	chr12	69676279	-	23
chr12	69841088	-	chr12	77215284	+	85
chr12	69898832	+	chr12	71581268	-	138
chr12	70063134	-	chr12	72949539	-	74
chr12	70142878	+	chr12	70763676	+	283
chr12	70302996	-	chr12	70806497	+	316
chr12	70378325	-	chr12	70664200	-	324
chr12	70594870	+	chr12	70597531	-	253
chr12	70701208	+	chr12	70700426	-	16
chr12	70872286	+	chr12	70878217	-	195
chr12	71348733	+	chr12	73574549	-	62
chr12	71398885	-	chr12	71430080	-	377
chr12	71399480	+	chr12	71398658	-	15
chr12	71416136	+	chr12	71415489	-	18
chr12	71433708	-	chr12	71434402	-	15
chr12	71444549	+	chr12	71443675	-	16
chr12	71452633	+	chr12	71451819	-	18
chr12	71473819	+	chr12	71472950	-	17
chr12	71500276	+	chr12	71499437	-	23
chr12	71509057	+	chr12	71508243	-	16
chr12	71532793	-	chr12	71532880	-	864
chr12	71533304	+	chr12	71533792	+	644
chr12	71534307	+	chr12	74629847	-	35
chr12	71602415	+	chr12	71604473	-	341
chr12	71772414	+	chr12	72482042	-	20
chr12	71835282	-	chr12	77990837	+	72
chr12	71844305	+	chr12	71845191	+	98
chr12	73017354	-	chr12	73059571	-	24
chr12	73107155	+	chr12	73131359	-	355
chr12	73260244	+	chr12	77014932	-	476
chr12	73301823	+	chr12	77134503	+	45
chr12	73585488	+	chr12	77060997	+	264
chr12	74104824	+	chr12	74105389	-	83
chr12	74106059	+	chr12	77126465	-	93
chr12	74125237	-	chr12	76551234	+	77
chr12	74672597	+	chr12	74672662	-	17
chr12	76096775	+	chr12	76103937	-	675
chr12	77425360	+	chr12	77647200	-	139
chr12	39639732	+	chr13	94794644	+	104
chr12	39945576	-	chr13	96441559	-	85
chr12	62660690	+	chr13	97474131	-	367
chr12	62922451	-	chr13	94396622	+	217
chr12	64372237	+	chr13	98029901	+	300
chr12	64863733	+	chr13	97874421	+	165
chr12	65082434	-	chr13	94446730	-	495
chr12	65368322	-	chr13	98120303	-	684
chr12	65462962	-	chr13	94175202	-	623
chr12	65550331	+	chr13	98207285	-	27
chr12	65785447	+	chr13	96978495	+	265
chr12	66795346	-	chr13	94359721	+	135
chr12	66851693	+	chr13	98219643	+	585
chr12	67848612	-	chr13	94834656	+	114
chr12	68175764	-	chr13	97597299	+	238
chr12	68408080	+	chr13	94232681	-	257
chr12	68648287	-	chr13	96940889	+	17
chr12	68656444	+	chr13	98153242	+	17
chr12	69007978	-	chr13	98805791	+	138
chr12	69327883	-	chr13	95281596	-	79
chr12	69619273	-	chr13	95389401	-	47
chr12	69849103	-	chr13	95299228	-	235
chr12	69989019	-	chr13	98026926	-	496
chr12	70291214	-	chr13	97987035	+	475
chr12	70462334	-	chr13	94580823	-	410
chr12	70474004	+	chr13	95095885	+	341
chr12	71307712	-	chr13	97165520	-	98
chr12	71377469	-	chr13	94404776	+	65
chr12	71470505	-	chr13	95394099	+	75
chr12	71524520	+	chr13	98050011	+	451
chr12	72301612	+	chr13	96934351	-	21
chr12	73260992	+	chr13	94819404	+	71
chr12	73330669	+	chr13	95276640	-	655
chr12	73430841	-	chr13	97169475	+	106
chr12	73513949	-	chr13	98811084	-	334
chr12	73613732	-	chr13	95421157	+	596
chr12	77020622	+	chr13	93813816	+	485
chr12	77059448	-	chr13	94411441	+	283
chr12	77125293	-	chr13	94709664	-	56
chr12	77211733	-	chr13	94700283	+	162
chr12	77244287	+	chr13	96471483	+	303
chr12	77280965	+	chr13	98014120	-	204
chr12	77410202	+	chr13	97737573	+	22
chr12	77878145	-	chr13	96638496	-	255
chr12	78038519	+	chr13	98062923	+	197
chr12	78077842	+	chr13	98823901	+	643
chr12	68680720	+	chr16	34672598	+	65
chr12	71034695	-	chr16	34671657	-	83
chr12	66886189	-	chr17	81181775	+	33
chr12	51463805	+	chrX	28969402	-	15
chr12	51483300	-	chrX	22075794	-	15
chr12	65523132	-	chrX	8223401	+	67
chr12	66203579	-	chrX	7057636	-	70
chr12	69812239	+	chrX	6754281	-	48
chr12	71242412	-	chrX	21140418	+	34
chr13	93808411	-	chr13	97937193	-	459
chr13	94242483	+	chr13	98144064	-	19
chr13	94576557	+	chr13	98797961	-	208
chr13	94804201	-	chr13	94828156	-	55
chr13	95067310	-	chr13	98822876	+	221
chr13	95073178	+	chr13	98729114	+	308
chr13	95074203	-	chr13	98696686	-	235
chr13	96662978	+	chr13	98779226	-	176
chr13	97644975	-	chr13	98037477	-	211
chr8	662215	-	chr12	64372384	-	185
chr8	861618	+	chr12	69190037	+	179
chr8	865229	-	chr12	67665970	-	105
chr8	1369931	+	chr13	95376293	+	276
chr8	1365245	-	chr8	1365433	+	128
chr8	1365370	+	chr8	1365271	-	18
chrX	4904717	+	chrX	4905023	-	15
chrX	16427699	+	chrX	16428212	-	37
chrX	17023427	+	chrX	21393522	+	26
chrX	20886951	+	chrX	20887291	-	15
chrX	21273094	-	chrX	21394429	-	26
chrX	21397693	+	chrX	21441737	-	20
chrX	21420673	+	chrX	29012180	+	33

## Sheet: T1000 (DR)
chrom1	start1	strand1	chrom2	start2	strand2	nreads
chr10	10187644	-	chr10	12942536	+	12
chr10	10189248	-	chr10	13412674	-	72
chr10	10520411	-	chr10	16131583	+	493
chr10	10605092	+	chr10	37753876	+	60
chr10	10754939	+	chr10	10755376	-	67
chr10	10941507	+	chr10	22398812	-	13
chr10	10941821	-	chr10	19665896	+	31
chr10	10942119	+	chr10	12661641	+	13
chr10	10984358	-	chr10	11024683	-	19
chr10	11056477	+	chr10	12738709	-	71
chr10	11194633	+	chr10	22576338	+	8
chr10	11232693	+	chr10	12557847	-	117
chr10	11262693	-	chr10	16362873	+	119
chr10	11295945	+	chr10	23260871	-	266
chr10	11325818	-	chr10	11326510	+	14
chr10	11494481	-	chr10	13031481	-	353
chr10	12192831	-	chr10	21760172	-	236
chr10	12289100	+	chr10	12289359	-	77
chr10	12303723	+	chr10	12304033	-	18
chr10	12353626	-	chr10	21823498	-	145
chr10	12388170	+	chr10	12387855	-	8
chr10	12411154	-	chr10	15091817	+	119
chr10	12560471	+	chr10	12562969	-	128
chr10	12597900	-	chr10	26650935	-	263
chr10	12627598	-	chr10	21111814	-	14
chr10	12638285	+	chr10	12764953	+	22
chr10	12662960	-	chr10	21860490	+	15
chr10	12702192	+	chr10	22195517	-	936
chr10	12744420	-	chr10	14866802	-	121
chr10	12747996	-	chr10	14252453	-	350
chr10	12765287	+	chr10	33600407	-	30
chr10	12946127	+	chr10	37933287	-	714
chr10	13942062	-	chr10	34179234	-	114
chr10	14241764	+	chr10	14242425	-	140
chr10	14303123	+	chr10	27559539	+	16
chr10	14317896	-	chr10	22602023	-	8
chr10	14399058	-	chr10	22366817	+	72
chr10	14409059	+	chr10	34260040	+	154
chr10	14430176	-	chr10	34272263	-	278
chr10	14441350	-	chr10	17343654	-	42
chr10	14572487	+	chr10	21308018	-	11
chr10	14592185	-	chr10	14863411	+	159
chr10	14610308	-	chr10	14610732	+	343
chr10	14954880	+	chr10	14955068	-	17
chr10	15094075	+	chr10	15216696	-	85
chr10	15101518	+	chr10	19660295	+	373
chr10	15167939	-	chr10	26652851	+	109
chr10	15271558	+	chr10	15271886	-	25
chr10	15532481	+	chr10	15532771	-	298
chr10	16039303	-	chr10	32388587	-	424
chr10	17337009	-	chr10	37608569	-	171
chr10	17366142	+	chr10	37952865	+	591
chr10	17383571	-	chr10	22666848	+	300
chr10	17388253	-	chr10	21261415	+	168
chr10	17660545	-	chr10	22615412	+	165
chr10	17885555	-	chr10	33639998	+	455
chr10	17929859	+	chr10	27682039	-	236
chr10	18475887	-	chr10	27575116	-	323
chr10	18503082	+	chr10	18503581	-	371
chr10	18538169	-	chr10	21156056	-	7
chr10	18545217	-	chr10	18545714	+	372
chr10	18636611	+	chr10	21282157	-	71
chr10	18637069	-	chr10	21328589	-	150
chr10	19643794	-	chr10	33556784	-	1353
chr10	19665685	-	chr10	22398956	+	9
chr10	20230680	+	chr10	22139008	-	20
chr10	20262521	+	chr10	35534349	+	604
chr10	20290728	-	chr10	23266912	+	871
chr10	20303115	-	chr10	20303660	+	7
chr10	20898144	-	chr10	34228875	-	376
chr10	20953865	-	chr10	34178949	+	180
chr10	20961032	+	chr10	37610386	+	129
chr10	20987770	+	chr10	22399995	+	545
chr10	21143768	+	chr10	34473244	+	65
chr10	21151905	+	chr10	22350214	-	77
chr10	21329737	+	chr10	35578362	-	982
chr10	21779323	-	chr10	27608821	+	32
chr10	21845132	+	chr10	34492471	-	72
chr10	21850629	-	chr10	22397643	-	75
chr10	22401867	-	chr10	34429428	+	131
chr10	22407083	+	chr10	34438112	-	208
chr10	22655212	+	chr10	37675948	+	68
chr10	22722275	+	chr10	34124532	+	96
chr10	22977448	-	chr10	35525608	-	613
chr10	23057852	+	chr10	27587068	+	371
chr10	23161361	-	chr10	33715201	-	436
chr10	23234415	+	chr10	37597236	-	537
chr10	26767968	+	chr10	26768240	-	95
chr10	27569735	+	chr10	28258480	+	11
chr10	28298584	+	chr10	34914421	-	324
chr10	34196779	+	chr10	34461942	-	965
chr10	34443020	-	chr10	34444998	-	26
chr10	47088387	+	chr10	47088700	-	44
chr10	10120538	-	chr12	65700854	+	302
chr10	10147426	-	chr12	65184715	+	7
chr10	10149566	+	chr12	65360211	+	8
chr10	10189624	-	chr12	92406403	+	63
chr10	10194974	+	chr12	54566345	+	75
chr10	10264754	+	chr12	92274141	+	10
chr10	10268431	-	chr12	69706763	-	21
chr10	10556513	-	chr12	69700458	+	21
chr10	10583692	-	chr12	59847466	-	59
chr10	10584072	+	chr12	121824689	+	52
chr10	10609405	+	chr12	58152649	-	23
chr10	10615018	-	chr12	69284858	+	71
chr10	10615932	+	chr12	70241884	-	75
chr10	10623973	-	chr12	48987505	-	16
chr10	10632687	+	chr12	52524048	+	454
chr10	10721516	-	chr12	41242605	-	190
chr10	10728835	+	chr12	65376462	+	24
chr10	10738127	+	chr12	69705145	+	9
chr10	10752284	-	chr12	87530124	-	87
chr10	10858950	+	chr12	65254172	+	15
chr10	10887476	+	chr12	61038926	+	633
chr10	10927330	-	chr12	58236100	+	1118
chr10	10940413	-	chr12	59899007	+	88
chr10	10941528	+	chr12	59899694	-	16
chr10	10942164	+	chr12	69794196	-	35
chr10	10946598	+	chr12	49889873	-	17
chr10	10961427	+	chr12	92299048	-	169
chr10	10978600	-	chr12	91601473	+	276
chr10	10992583	-	chr12	66408317	-	139
chr10	10992599	+	chr12	92008366	+	16
chr10	10994368	+	chr12	92837639	+	155
chr10	11000733	-	chr12	69313793	+	187
chr10	11001496	-	chr12	92284232	+	18
chr10	11029536	-	chr12	58233772	+	95
chr10	11031198	+	chr12	45833448	-	12
chr10	11043153	-	chr12	65302810	+	16
chr10	11044517	-	chr12	92028897	-	7
chr10	11056348	-	chr12	88691909	+	7
chr10	11058797	+	chr12	66309219	+	27
chr10	11124521	-	chr12	46022500	-	540
chr10	11128954	+	chr12	44253996	-	71
chr10	11136315	-	chr12	45706401	-	235
chr10	11147970	+	chr12	65436784	-	13
chr10	11156441	+	chr12	92706757	-	152
chr10	11169167	+	chr12	122439023	+	289
chr10	11174020	-	chr12	121949623	-	222
chr10	11285511	-	chr12	54579842	+	217
chr10	12045221	-	chr12	65593736	-	396
chr10	12048558	+	chr12	69891105	+	414
chr10	12278248	+	chr12	54483332	-	15
chr10	12440561	+	chr12	121759062	+	531
chr10	12548147	-	chr12	52128643	-	444
chr10	12556522	+	chr12	45812728	-	459
chr10	12617290	+	chr12	52374193	+	222
chr10	12625653	-	chr12	48977075	-	1053
chr10	12659842	-	chr12	69793697	-	76
chr10	12660092	+	chr12	50143440	+	18
chr10	12680453	+	chr12	94079380	+	15
chr10	12692834	+	chr12	44295067	+	159
chr10	12733717	+	chr12	123043034	+	9
chr10	12735339	+	chr12	69667923	-	20
chr10	12755697	-	chr12	65361998	-	17
chr10	12777080	-	chr12	91761377	-	23
chr10	12778419	+	chr12	65321968	-	23
chr10	12779535	-	chr12	44264521	+	27
chr10	12781505	+	chr12	97191602	-	61
chr10	12784779	-	chr12	121959522	+	68
chr10	12786175	+	chr12	65871724	-	1091
chr10	12922730	-	chr12	45940528	+	607
chr10	13047516	+	chr12	50707270	+	363
chr10	13424214	-	chr12	123469673	-	70
chr10	13424232	+	chr12	45902266	+	78
chr10	13443042	+	chr12	45884900	-	80
chr10	14307850	+	chr12	71067065	+	141
chr10	14408042	+	chr12	65365206	-	71
chr10	14539893	-	chr12	43506090	-	91
chr10	14601671	-	chr12	88851780	+	29
chr10	14609822	+	chr12	87667373	-	19
chr10	14643750	+	chr12	93743466	+	12
chr10	14643928	-	chr12	69649088	-	37
chr10	14645323	-	chr12	58185626	-	76
chr10	14648652	+	chr12	65338994	+	31
chr10	14649450	-	chr12	59876183	-	89
chr10	14686343	+	chr12	69012014	-	660
chr10	14896894	-	chr12	66491790	-	65
chr10	15099746	-	chr12	57141550	+	400
chr10	15130550	-	chr12	69040325	-	52
chr10	15131270	+	chr12	58206725	-	66
chr10	15498428	-	chr12	69020354	+	53
chr10	15498616	+	chr12	69015530	+	16
chr10	16251346	-	chr12	49215449	-	342
chr10	16272082	+	chr12	65503624	+	214
chr10	16362568	+	chr12	47964112	+	61
chr10	17335489	-	chr12	91681456	+	12
chr10	17344021	+	chr12	43503291	+	79
chr10	17348688	+	chr12	65278353	+	67
chr10	17363846	-	chr12	52657283	+	16
chr10	17406317	+	chr12	65388596	-	17
chr10	17721802	+	chr12	39203803	+	292
chr10	17776218	+	chr12	65543361	-	256
chr10	17854661	+	chr12	45981897	+	12
chr10	18506281	+	chr12	88841276	-	21
chr10	18521410	-	chr12	50004314	+	13
chr10	18592644	+	chr12	45215637	-	81
chr10	18630408	-	chr12	66502214	+	1107
chr10	18634891	+	chr12	69762498	-	11
chr10	18657045	+	chr12	43543813	+	1046
chr10	19703428	-	chr12	88648633	+	14
chr10	19706708	+	chr12	45319541	+	17
chr10	19708204	+	chr12	41961925	+	835
chr10	20187079	-	chr12	44541481	-	468
chr10	20196025	+	chr12	92002179	-	21
chr10	20221208	-	chr12	121830150	-	21
chr10	20248377	-	chr12	57220430	+	50
chr10	20329080	-	chr12	69563839	+	14
chr10	20332548	-	chr12	91715904	+	59
chr10	20334397	+	chr12	58482984	-	68
chr10	20346162	+	chr12	49031060	+	17
chr10	20353290	+	chr12	65413529	+	15
chr10	20394201	+	chr12	41801782	-	623
chr10	20899856	+	chr12	69581533	+	14
chr10	20947567	+	chr12	93171558	-	168
chr10	20954335	+	chr12	122616005	-	143
chr10	20954416	-	chr12	49030880	-	133
chr10	20963772	-	chr12	93273610	+	177
chr10	20976251	-	chr12	54491982	+	43
chr10	21110046	-	chr12	60096146	+	83
chr10	21127161	+	chr12	47936792	-	15
chr10	21145712	-	chr12	91887765	-	26
chr10	21151267	+	chr12	51147856	-	189
chr10	21210137	+	chr12	42321001	-	13
chr10	21215065	-	chr12	58203870	-	168
chr10	21233895	-	chr12	60070718	+	175
chr10	21242587	+	chr12	69551599	-	27
chr10	21268134	+	chr12	87553551	-	75
chr10	21288646	+	chr12	93142676	-	170
chr10	21299610	+	chr12	65282010	-	69
chr10	21302522	-	chr12	65290912	-	15
chr10	21319742	+	chr12	57291132	-	15
chr10	21825065	-	chr12	65288885	-	8
chr10	21830880	-	chr12	66476924	-	34
chr10	21855763	+	chr12	88292511	+	87
chr10	21911891	-	chr12	91175150	-	62
chr10	21941227	+	chr12	41150168	-	438
chr10	22136186	-	chr12	46121578	+	384
chr10	22140663	+	chr12	52666273	+	18
chr10	22204308	+	chr12	61017150	-	918
chr10	22348449	-	chr12	49889054	-	461
chr10	22361588	+	chr12	71867259	+	158
chr10	22422269	+	chr12	57088595	-	417
chr10	22567865	-	chr12	65458110	-	16
chr10	22593187	+	chr12	92279522	-	17
chr10	22606782	-	chr12	50678248	+	75
chr10	22608073	+	chr12	59979100	+	66
chr10	22637067	-	chr12	115566353	+	83
chr10	22639584	+	chr12	60074921	-	100
chr10	22987214	-	chr12	66287215	-	14
chr10	22998162	+	chr12	44280276	-	233
chr10	23183747	-	chr12	66232996	-	71
chr10	23185646	+	chr12	66230289	-	64
chr10	23188443	-	chr12	123059531	+	66
chr10	23246335	-	chr12	66471998	-	859
chr10	23265881	+	chr12	45715509	+	237
chr10	27376910	-	chr12	54914234	-	1458
chr10	27546735	-	chr12	121824341	-	397
chr10	27559043	-	chr12	115770570	+	22
chr10	27572554	+	chr12	51008502	-	343
chr10	27725358	+	chr12	59599185	+	75
chr10	27767923	+	chr12	93141897	-	159
chr10	27769895	+	chr12	50126908	-	167
chr10	27985485	-	chr12	65336617	+	80
chr10	28206973	-	chr12	47429596	+	202
chr10	28229996	-	chr12	43421830	-	372
chr10	28230811	-	chr12	65426766	-	176
chr10	28230903	+	chr12	92967161	+	412
chr10	28230913	-	chr12	93333291	+	171
chr10	28274418	+	chr12	58166648	+	151
chr10	32362010	-	chr12	48932072	-	142
chr10	32369828	+	chr12	122646407	-	177
chr10	32404095	+	chr12	42310057	-	466
chr10	33600993	+	chr12	54616570	-	13
chr10	33606202	+	chr12	52133483	-	445
chr10	33742397	-	chr12	94225879	+	516
chr10	33743660	+	chr12	91745253	-	191
chr10	33744073	-	chr12	94223159	-	207
chr10	33820909	+	chr12	69610982	-	171
chr10	33927990	-	chr12	119153067	+	152
chr10	33928917	-	chr12	119099915	+	16
chr10	33932044	+	chr12	93620158	-	159
chr10	33943472	+	chr12	69476315	+	55
chr10	33944375	+	chr12	51123167	-	20
chr10	34009719	-	chr12	52471073	-	66
chr10	34016307	-	chr12	93093226	+	20
chr10	34020426	+	chr12	52401690	-	777
chr10	34177520	-	chr12	43408132	-	209
chr10	34178243	-	chr12	83702291	-	197
chr10	34281461	-	chr12	115457746	+	85
chr10	34283536	+	chr12	121947948	+	556
chr10	34454514	+	chr12	59804126	-	212
chr10	34506170	+	chr12	49106188	+	1170
chr10	34532827	+	chr12	50167309	+	100
chr10	34921900	+	chr12	93616891	+	181
chr10	34921956	-	chr12	80449582	-	160
chr10	34923203	+	chr12	49032151	+	181
chr10	34955451	+	chr12	119117393	-	166
chr10	34958534	+	chr12	54671422	+	156
chr10	35579351	+	chr12	43455723	+	32
chr10	35579357	+	chr12	58478115	-	796
chr10	37617287	-	chr12	66230691	+	81
chr10	37661639	+	chr12	91895755	+	54
chr10	37665492	-	chr12	69200514	-	7
chr10	37669301	+	chr12	51857216	+	7
chr10	37709822	-	chr12	59993575	+	79
chr10	37751819	-	chr12	69344528	+	71
chr10	37758046	-	chr12	121740084	-	459
chr10	37811653	-	chr12	87441307	+	66
chr10	37853943	+	chr12	48942168	+	218
chr10	21116806	-	chr13	110595113	+	24
chr10	11056359	-	chr17	63616915	+	11
chr12	41110096	-	chr12	44312490	+	655
chr12	41121311	+	chr12	66404235	-	791
chr12	41255498	+	chr12	65363817	+	103
chr12	41302362	-	chr12	69454484	-	64
chr12	41318945	+	chr12	52355044	+	71
chr12	41326420	-	chr12	54599798	-	18
chr12	41512322	+	chr12	62776259	-	131
chr12	42383353	-	chr12	122856491	+	21
chr12	42383533	+	chr12	119132607	-	17
chr12	43428144	-	chr12	64702291	-	77
chr12	43435799	-	chr12	88282815	-	71
chr12	43468948	+	chr12	43469460	-	25
chr12	43469776	+	chr12	65241934	-	18
chr12	43479833	+	chr12	52445292	+	52
chr12	43506133	-	chr12	52618634	-	7
chr12	43518885	-	chr12	57487539	+	167
chr12	43540745	+	chr12	44550614	+	161
chr12	44283717	+	chr12	123034252	+	242
chr12	44541692	-	chr12	45928269	-	43
chr12	44568204	+	chr12	51010851	-	12
chr12	44576803	+	chr12	65378521	+	230
chr12	45467966	+	chr12	69853636	+	227
chr12	45853104	+	chr12	64776639	+	408
chr12	45866097	-	chr12	50040604	+	550
chr12	45869940	+	chr12	50018200	-	26
chr12	45970042	-	chr12	65902516	+	981
chr12	45980906	+	chr12	122618333	+	167
chr12	46023991	+	chr12	57952360	+	68
chr12	47761242	-	chr12	91714117	+	329
chr12	47784612	+	chr12	115642561	-	26
chr12	47858641	+	chr12	47862852	-	12
chr12	47936334	+	chr12	92360264	-	25
chr12	48241695	-	chr12	118903481	-	136
chr12	48936094	+	chr12	54183622	-	209
chr12	48939648	+	chr12	70246087	-	74
chr12	48985099	+	chr12	94023687	-	342
chr12	48989168	+	chr12	64647077	+	18
chr12	49032180	-	chr12	93325371	-	80
chr12	49082290	-	chr12	69098988	-	74
chr12	49216544	+	chr12	52542538	-	308
chr12	49992153	-	chr12	69203026	+	9
chr12	50001188	-	chr12	91803532	+	19
chr12	50031762	+	chr12	65376556	+	94
chr12	50033171	-	chr12	65885211	+	16
chr12	50623718	-	chr12	54844711	+	345
chr12	50837093	-	chr12	122419314	+	131
chr12	51011932	+	chr12	121854501	+	26
chr12	51085293	-	chr12	121898148	-	153
chr12	51097300	+	chr12	66494121	-	285
chr12	51148922	+	chr12	118974233	-	444
chr12	51851530	-	chr12	59897336	+	8
chr12	51910975	+	chr12	59619592	+	323
chr12	52402213	+	chr12	65360212	-	63
chr12	52410285	+	chr12	58171587	-	54
chr12	52427641	-	chr12	54241444	+	82
chr12	52457757	+	chr12	60010788	+	95
chr12	52459384	+	chr12	91572076	-	205
chr12	52473238	+	chr12	87677204	+	61
chr12	52595103	-	chr12	91590392	-	1533
chr12	52597904	-	chr12	69501076	+	21
chr12	52623445	+	chr12	93213942	+	21
chr12	52635734	+	chr12	115668355	+	209
chr12	52643211	+	chr12	87562341	+	75
chr12	52661138	-	chr12	65236547	+	24
chr12	52669194	+	chr12	66336319	+	1283
chr12	54184487	-	chr12	92902883	+	16
chr12	54206271	-	chr12	122433162	-	11
chr12	54220474	+	chr12	69723850	+	67
chr12	54232977	-	chr12	69501628	+	85
chr12	54241471	-	chr12	60041299	-	80
chr12	54450751	-	chr12	123211444	+	352
chr12	54491328	-	chr12	69160477	-	68
chr12	54504467	+	chr12	122969173	+	65
chr12	54506903	-	chr12	65339633	-	66
chr12	54524831	+	chr12	92536095	-	19
chr12	54535756	-	chr12	69655888	+	93
chr12	54535772	+	chr12	121985413	+	100
chr12	54561501	-	chr12	121919875	+	69
chr12	54561513	+	chr12	91299429	+	99
chr12	54566340	-	chr12	69462729	+	52
chr12	54607558	+	chr12	66282035	-	67
chr12	54795642	+	chr12	92082793	+	852
chr12	54829094	+	chr12	115560872	-	53
chr12	57210183	-	chr12	62831127	+	490
chr12	57272287	+	chr12	65301368	+	7
chr12	57488444	-	chr12	69728655	+	77
chr12	57949539	-	chr12	58492151	+	787
chr12	57953743	+	chr12	57953996	-	11
chr12	57992847	+	chr12	92094992	-	17
chr12	58016907	+	chr12	119077684	-	18
chr12	58032498	+	chr12	88343485	-	87
chr12	58047515	-	chr12	121947364	-	9
chr12	58091297	-	chr12	65124194	+	10
chr12	58117946	-	chr12	115862583	+	195
chr12	58157813	+	chr12	118977725	+	15
chr12	58164208	+	chr12	115536298	-	9
chr12	58181457	-	chr12	69826734	+	14
chr12	58182455	+	chr12	69457091	-	26
chr12	58214792	+	chr12	93747112	+	13
chr12	58214849	+	chr12	88372057	+	13
chr12	59534725	-	chr12	65327389	+	18
chr12	59842950	-	chr12	65370623	-	18
chr12	59843052	-	chr12	93741915	+	42
chr12	59850743	+	chr12	115819495	-	26
chr12	59892093	+	chr12	70622477	+	59
chr12	59916755	+	chr12	93176772	+	66
chr12	59959703	-	chr12	69472022	-	68
chr12	59963050	+	chr12	115639135	-	90
chr12	59980017	-	chr12	60019609	-	101
chr12	60029436	+	chr12	69411832	+	77
chr12	60053294	-	chr12	64741493	-	12
chr12	60252226	-	chr12	93094395	+	118
chr12	60263586	+	chr12	119331976	+	337
chr12	61033437	+	chr12	88072196	-	33
chr12	64662890	+	chr12	66376946	+	56
chr12	64666133	+	chr12	65895272	-	19
chr12	64731061	+	chr12	66401132	+	764
chr12	65134845	+	chr12	65134999	-	80
chr12	65144543	-	chr12	88653071	-	60
chr12	65213094	+	chr12	65892747	+	24
chr12	65236581	-	chr12	88487657	-	32
chr12	65237033	-	chr12	65322705	+	23
chr12	65241961	-	chr12	92463066	-	22
chr12	65242692	+	chr12	119009963	+	8
chr12	65328009	+	chr12	69701375	-	14
chr12	65328998	+	chr12	66500810	+	12
chr12	65330837	-	chr12	93023140	-	20
chr12	65340350	-	chr12	97403643	+	73
chr12	65367868	-	chr12	69276807	+	56
chr12	65370694	-	chr12	93741754	-	51
chr12	65372072	+	chr12	88703192	+	56
chr12	65393506	+	chr12	92318190	-	131
chr12	65407886	-	chr12	119010983	-	18
chr12	65430559	+	chr12	91595161	-	13
chr12	65472335	-	chr12	94111012	+	24
chr12	65491004	+	chr12	88483142	+	119
chr12	65563724	+	chr12	87685596	-	144
chr12	65667294	+	chr12	87594483	-	42
chr12	65704078	-	chr12	119241004	-	149
chr12	66166516	-	chr12	108738129	+	1005
chr12	66245811	+	chr12	115492881	+	30
chr12	66323215	-	chr12	92472933	+	8
chr12	69012375	+	chr12	69728632	+	48
chr12	69015474	+	chr12	93171889	-	43
chr12	69019908	-	chr12	69231221	-	121
chr12	69020388	+	chr12	93172059	+	7
chr12	69082003	-	chr12	69882944	-	54
chr12	69101716	+	chr12	69102249	-	169
chr12	69115024	+	chr12	112537018	-	106
chr12	69224184	-	chr12	91276901	+	69
chr12	69232225	-	chr12	121957719	+	8
chr12	69255737	+	chr12	69256509	-	477
chr12	69312022	-	chr12	70251333	+	68
chr12	69385068	-	chr12	121911031	-	32
chr12	69411369	-	chr12	69727116	-	80
chr12	69435094	+	chr12	69435432	-	7
chr12	69461710	-	chr12	69577639	-	17
chr12	69500217	-	chr12	69574583	-	26
chr12	69508970	+	chr12	122936358	-	70
chr12	69513047	+	chr12	91732501	+	19
chr12	69513383	-	chr12	69633606	+	45
chr12	69532964	+	chr12	88567566	-	12
chr12	69568820	+	chr12	69569368	-	13
chr12	69586277	+	chr12	88157823	+	174
chr12	69655870	-	chr12	92049364	-	77
chr12	69668144	+	chr12	91643023	-	9
chr12	69692329	-	chr12	115755598	+	17
chr12	69700921	-	chr12	91287764	+	53
chr12	69718705	-	chr12	121946615	+	85
chr12	69720611	-	chr12	93829395	+	22
chr12	69722310	-	chr12	91295015	-	79
chr12	69730007	+	chr12	69764955	+	22
chr12	69783774	-	chr12	88414627	+	171
chr12	69830697	+	chr12	123365552	+	274
chr12	69872950	+	chr12	87543945	+	10
chr12	69881612	+	chr12	88699039	-	40
chr12	70093703	+	chr12	70094056	-	7
chr12	70304006	+	chr12	93113981	+	97
chr12	70594869	+	chr12	70597572	-	176
chr12	70621112	-	chr12	88378786	-	46
chr12	80447690	-	chr12	91004219	-	370
chr12	80448621	+	chr12	119303122	+	282
chr12	83712879	-	chr12	93278557	-	159
chr12	87395793	-	chr12	121907087	-	289
chr12	87406913	+	chr12	93788752	+	322
chr12	87413547	-	chr12	108737161	-	896
chr12	87488383	+	chr12	123005366	-	137
chr12	87532101	+	chr12	88834858	-	82
chr12	87594946	+	chr12	88851509	+	9
chr12	87595057	+	chr12	88851302	-	15
chr12	87606251	-	chr12	91310575	-	173
chr12	87609416	+	chr12	121901539	-	135
chr12	87620120	+	chr12	92077336	-	57
chr12	87628187	-	chr12	121919865	-	99
chr12	88070511	-	chr12	115915058	-	366
chr12	88105499	-	chr12	88394773	-	180
chr12	88185282	-	chr12	88395355	+	130
chr12	88297353	+	chr12	88407314	-	147
chr12	88372004	+	chr12	93746971	-	17
chr12	88518602	+	chr12	123041068	-	38
chr12	88813508	+	chr12	91314732	+	167
chr12	91612440	+	chr12	94205625	-	10
chr12	91657639	+	chr12	93030700	-	12
chr12	91670046	+	chr12	92088060	+	20
chr12	91697711	-	chr12	92675831	-	18
chr12	91741625	-	chr12	115527399	-	24
chr12	91749202	+	chr12	123514248	+	169
chr12	91920866	+	chr12	93155447	-	18
chr12	92056691	+	chr12	121964019	-	73
chr12	92356898	+	chr12	123400938	+	259
chr12	92530211	+	chr12	93698892	+	127
chr12	92592943	+	chr12	93086804	+	17
chr12	92961922	-	chr12	119298150	-	374
chr12	92972445	-	chr12	93612662	-	104
chr12	93085855	-	chr12	123093733	+	19
chr12	93173222	-	chr12	123467384	-	109
chr12	93193851	+	chr12	123029441	-	378
chr12	93322472	+	chr12	122676970	-	150
chr12	93685850	-	chr12	112538515	+	172
chr12	93693086	+	chr12	93832351	+	94
chr12	93815637	-	chr12	115924823	+	408
chr12	94216739	+	chr12	94219051	-	419
chr12	115452458	-	chr12	122691135	-	62
chr12	115527778	+	chr12	115591577	-	60
chr12	115582446	+	chr12	115645220	+	339
chr12	115645316	-	chr12	123393476	+	206
chr12	119149363	-	chr12	121931719	+	7
chr12	121901542	+	chr12	121907193	+	107
chr12	122426235	-	chr12	123349166	-	537
chr12	123050506	+	chr12	123196923	-	54
chr12	123363994	-	chr12	123365611	-	286
chr12	54791134	+	chr13	110301398	-	29
chr12	57137879	-	chr13	110583258	-	26
chr12	66259318	+	chr13	110679811	+	7
chr12	66328491	+	chr13	110301357	+	38
chr12	69631353	+	chr13	110588994	+	15
chr12	69631412	-	chr13	110591892	-	16
chr12	69634497	+	chr13	112064696	+	12
chr12	87608151	-	chr13	110319375	+	12
chr12	69639131	-	chr17	63157416	-	137
chr12	69874836	-	chr17	63618343	-	59
chr12	88691607	+	chr17	63263301	-	37
chr12	88710215	+	chr17	63225757	+	54
chr12	115478245	+	chr17	63490041	+	48
chr13	110221823	+	chr13	110222417	-	35
chr13	110418277	+	chr13	110419088	-	21
chr13	111559433	+	chr13	111559646	-	61
chr13	111704591	+	chr13	111704895	-	52
chr17	67176709	-	chr17	77105379	-	92
chr2	10151629	-	chr2	10153425	+	11
chr2	87641945	-	chr2	90481672	-	16
chr2	87642137	+	chr2	90482321	+	16
chr2	87644541	+	chr2	90482392	+	44
chr2	90478610	+	chr2	90478999	-	13
chr2	90481911	-	chr2	90482408	+	12
chr2	90482425	+	chr2	90483104	-	10
chr2	91784278	+	chr2	91785040	-	8
chr4	27744	-	chr12	69662516	+	71

## Sheet: LPS141 (DR)
chrom1	start1	strand1	chrom2	start2	strand2	nreads
chr1	2371833	-	chr1	2372168	+	12
chr1	2583620	-	chr1	2629346	+	8
chr1	2583662	-	chr1	2586436	+	9
chr1	2586536	+	chr1	2629005	-	13
chr1	2587798	+	chr1	2620271	-	13
chr1	17051734	-	chr1	234912186	-	28
chr1	145026697	+	chr1	145027050	-	16
chr1	160797089	-	chr1	160799255	-	22
chr1	160860581	+	chr1	171621958	-	9
chr1	160935029	+	chr1	160935327	-	35
chr1	160954889	+	chr1	160955155	-	21
chr1	161196211	-	chr1	163287118	-	49
chr1	161272513	+	chr1	171611158	+	10
chr1	161371200	+	chr1	162012495	-	48
chr1	161396921	-	chr1	161972985	+	46
chr1	161403363	+	chr1	166515915	-	97
chr1	163380163	-	chr1	171468803	-	158
chr1	163439436	-	chr1	163440667	-	12
chr1	164359933	-	chr1	171524906	-	27
chr1	167043537	-	chr1	167043759	+	34
chr1	169186678	-	chr1	172786083	+	295
chr1	169189462	+	chr1	169192843	-	10
chr1	169194075	+	chr1	169316338	+	10
chr1	169197508	+	chr1	169279000	-	17
chr1	169458666	+	chr1	171271685	-	25
chr1	171478210	+	chr1	171582983	+	34
chr1	172208508	-	chr1	172216817	-	13
chr1	160847025	+	chr10	51590647	-	76
chr1	164548126	+	chr10	44748881	+	113
chr1	150544424	-	chr12	84784907	+	144
chr1	150608920	+	chr12	88274010	+	123
chr1	151675154	-	chr12	70446726	-	86
chr1	160778321	-	chr12	72984052	-	19
chr1	161138165	+	chr12	70945981	+	8
chr1	161851556	-	chr12	68693821	-	7
chr1	163250578	-	chr12	71632808	+	31
chr1	163284841	-	chr12	72529236	+	55
chr1	163313685	+	chr12	79023314	-	41
chr1	163319277	-	chr12	84480390	-	193
chr1	163326254	-	chr12	59909238	+	8
chr1	163380710	+	chr12	68281793	-	39
chr1	163388651	-	chr12	59778444	+	11
chr1	163426822	+	chr12	70772690	-	22
chr1	163434578	-	chr12	76274852	-	337
chr1	163457792	+	chr12	43491546	-	272
chr1	164361179	-	chr12	72652265	-	29
chr1	164399898	+	chr12	61359995	-	25
chr1	164409817	+	chr12	38751820	-	79
chr1	164414644	+	chr12	68703109	-	36
chr1	164532987	+	chr12	78719055	+	25
chr1	166852652	-	chr12	76331394	-	7
chr1	166930716	+	chr12	70047237	-	112
chr1	167043591	-	chr12	67491874	-	10
chr1	168753009	-	chr12	82598903	+	126
chr1	168903565	-	chr12	58220960	+	168
chr1	169189538	-	chr12	69065749	+	13
chr1	169192815	+	chr12	72662959	+	19
chr1	169193815	+	chr12	72662373	-	11
chr1	169193898	-	chr12	79021738	-	8
chr1	169271993	+	chr12	79029479	+	22
chr1	169325326	+	chr12	60115537	+	287
chr1	169330007	-	chr12	71424346	-	27
chr1	171284885	+	chr12	85208965	+	12
chr1	171542530	+	chr12	60111119	+	71
chr1	171569492	+	chr12	60257718	-	9
chr1	171616022	+	chr12	68688758	-	106
chr1	171798334	-	chr12	60099248	-	81
chr1	172121430	-	chr12	88481923	+	226
chr1	172176435	+	chr12	59790794	+	12
chr1	172233765	+	chr12	69734540	+	17
chr1	172236450	-	chr12	60090343	+	12
chr1	172237236	+	chr12	72846275	+	30
chr1	172288111	+	chr12	62002716	+	32
chr1	172297221	-	chr12	62170982	-	19
chr1	172695538	-	chr12	69860213	-	355
chr1	172700322	-	chr12	59998883	-	13
chr1	172726959	+	chr12	69225960	+	9
chr1	172738036	+	chr12	69397519	-	8
chr1	173456023	-	chr12	68498190	-	73
chr10	48328231	-	chr10	48439541	+	65
chr10	44746415	-	chr12	82470705	-	138
chr10	48368261	+	chr12	73219193	+	73
chr10	66361018	+	chr12	43764215	-	7
chr11	62609093	-	chr11	62609281	+	16
chr11	99690478	+	chr11	99691296	+	11
chr11	104180393	+	chr11	104180720	-	18
chr11	131550256	-	chr11	131551681	+	12
chr11	132083626	+	chr11	132083944	-	17
chr12	38832893	-	chr12	69318843	-	11
chr12	38895937	+	chr12	69922822	-	39
chr12	38922778	+	chr12	60089944	-	19
chr12	39006773	+	chr12	60108672	+	15
chr12	39215097	-	chr12	79028001	+	21
chr12	39271716	-	chr12	73361501	+	62
chr12	39309137	-	chr12	71016238	+	50
chr12	39323877	+	chr12	62146454	-	72
chr12	39860007	+	chr12	39860301	+	19
chr12	39860124	-	chr12	39860401	-	14
chr12	43511544	+	chr12	80401314	-	326
chr12	43544090	+	chr12	55998804	-	127
chr12	43603360	-	chr12	50548327	-	35
chr12	43603362	-	chr12	80432159	-	23
chr12	43741710	-	chr12	68007192	-	69
chr12	43882014	-	chr12	71132190	-	34
chr12	50523815	-	chr12	86531033	+	52
chr12	50539981	-	chr12	58156133	+	315
chr12	50553520	+	chr12	80441469	+	261
chr12	50846459	-	chr12	58160361	+	189
chr12	50849680	+	chr12	62526303	+	202
chr12	50886742	-	chr12	60297004	+	79
chr12	50934247	+	chr12	68128783	-	43
chr12	51019457	+	chr12	72394572	+	28
chr12	51023982	-	chr12	59713637	-	195
chr12	51334167	+	chr12	84520030	+	13
chr12	55999927	+	chr12	58321885	+	94
chr12	57596874	-	chr12	57625049	-	29
chr12	57885866	-	chr12	59729230	+	122
chr12	57894562	-	chr12	59726950	-	41
chr12	57925156	+	chr12	78893158	-	50
chr12	58114331	-	chr12	68680050	+	147
chr12	58124201	-	chr12	69210410	-	60
chr12	58152226	+	chr12	78962543	-	18
chr12	58210241	-	chr12	68700115	+	119
chr12	58211927	+	chr12	68308048	+	12
chr12	58214511	-	chr12	68895131	-	135
chr12	58310011	+	chr12	58310362	-	7
chr12	58310255	+	chr12	72664336	-	33
chr12	59722025	+	chr12	78899620	-	25
chr12	59727350	+	chr12	78900938	+	9
chr12	59737409	-	chr12	72471441	-	533
chr12	59771020	+	chr12	73092179	-	37
chr12	59799259	-	chr12	79040926	+	23
chr12	59819189	+	chr12	71136804	+	62
chr12	59966834	-	chr12	68744655	+	45
chr12	60035985	+	chr12	69140411	-	20
chr12	60074333	+	chr12	80441435	+	63
chr12	60077943	-	chr12	70466199	+	162
chr12	60079570	+	chr12	64919743	-	159
chr12	60097208	+	chr12	70912820	+	17
chr12	60097547	-	chr12	72929289	-	15
chr12	60098187	-	chr12	66451373	-	7
chr12	60156584	-	chr12	61451788	+	72
chr12	60229343	+	chr12	72361421	+	8
chr12	61328070	-	chr12	80306069	+	97
chr12	61672158	-	chr12	80298494	-	98
chr12	61966145	-	chr12	74327838	+	9
chr12	61998230	-	chr12	73266616	-	226
chr12	62087952	-	chr12	84551648	+	93
chr12	62088525	+	chr12	73268680	+	226
chr12	62174997	+	chr12	70811947	-	11
chr12	62523044	-	chr12	70779563	+	190
chr12	64927630	+	chr12	71739992	-	122
chr12	64934702	-	chr12	67509541	-	17
chr12	64969735	+	chr12	69247533	-	85
chr12	66064814	-	chr12	66362704	+	288
chr12	66147439	+	chr12	71668627	+	85
chr12	66152888	-	chr12	72488281	-	73
chr12	66154040	-	chr12	67977865	-	8
chr12	66156272	-	chr12	68291847	+	20
chr12	66161093	+	chr12	78762020	+	7
chr12	66172065	+	chr12	68651748	-	61
chr12	66207077	+	chr12	66207346	-	126
chr12	66274592	-	chr12	66312218	-	9
chr12	66315666	+	chr12	67510348	-	8
chr12	66358085	+	chr12	68992916	+	208
chr12	66358974	-	chr12	69011051	-	286
chr12	66451364	-	chr12	69929687	+	11
chr12	67351804	+	chr12	69247126	+	18
chr12	67492021	+	chr12	87126962	+	13
chr12	67512161	+	chr12	72516410	+	8
chr12	67601331	+	chr12	67602680	+	12
chr12	67804369	-	chr12	69373399	+	13
chr12	67810116	-	chr12	71363214	-	25
chr12	67884745	+	chr12	72666423	-	21
chr12	68151017	+	chr12	72644011	-	29
chr12	68514462	-	chr12	70433663	-	96
chr12	68569047	-	chr12	69734155	-	40
chr12	68572641	-	chr12	69209436	-	7
chr12	68597687	+	chr12	69289731	-	13
chr12	68627722	-	chr12	71626822	+	8
chr12	68631199	+	chr12	71571961	+	8
chr12	68656367	+	chr12	72700503	-	87
chr12	68726121	-	chr12	71132739	+	18
chr12	68726759	+	chr12	82562810	-	12
chr12	68772410	+	chr12	87126966	+	11
chr12	69072069	+	chr12	78751805	-	7
chr12	69097499	-	chr12	69877591	+	7
chr12	69171001	-	chr12	84677684	+	29
chr12	69184934	+	chr12	84713416	-	26
chr12	69260780	-	chr12	80431388	+	11
chr12	69261183	+	chr12	69264128	+	8
chr12	69312927	+	chr12	69939858	+	11
chr12	69331777	+	chr12	88178464	-	193
chr12	69412889	+	chr12	71539824	-	9
chr12	69435099	+	chr12	69435350	-	13
chr12	69569551	+	chr12	70158756	+	33
chr12	69610723	+	chr12	71114712	-	204
chr12	69735339	-	chr12	78955463	-	20
chr12	69738606	+	chr12	78657755	-	70
chr12	69910633	+	chr12	84512246	-	44
chr12	69930163	-	chr12	82558841	+	19
chr12	69932253	+	chr12	71239042	-	37
chr12	69953105	-	chr12	69981992	+	10
chr12	69963580	+	chr12	72498947	+	15
chr12	69970339	+	chr12	71190708	-	17
chr12	69988521	+	chr12	69989544	-	8
chr12	70000317	+	chr12	70053789	-	9
chr12	70015519	+	chr12	72931795	+	19
chr12	70153941	-	chr12	78767661	-	19
chr12	70449309	-	chr12	72679978	+	54
chr12	70844585	+	chr12	70953978	+	14
chr12	70996137	+	chr12	71028039	+	12
chr12	71532783	-	chr12	71533742	-	199
chr12	71533279	+	chr12	71533759	+	171
chr12	71539941	+	chr12	71571256	-	10
chr12	71752888	+	chr12	78702946	+	31
chr12	72189163	+	chr12	72190570	-	44
chr12	72356618	+	chr12	72358122	-	50
chr12	72477850	+	chr12	72478733	-	508
chr12	72524605	-	chr12	78545281	-	10
chr12	72631389	+	chr12	79018022	+	13
chr12	72647540	+	chr12	88192415	+	34
chr12	72663118	-	chr12	78988758	-	8
chr12	72680219	+	chr12	72683215	+	170
chr12	72811921	+	chr12	73115433	+	8
chr12	72923236	+	chr12	82494043	-	17
chr12	78662559	+	chr12	78677690	-	61
chr12	80431070	+	chr12	80432947	+	8
chr12	87126723	-	chr12	87126926	+	12
chr12	87126768	-	chr12	87126775	-	55
chr12	38896604	-	chr16	33735724	-	25
chr12	43543289	-	chr16	32606786	-	145
chr12	73133199	-	chr16	33762289	+	43
chr12	78938783	+	chr16	33537978	-	25
chr12	82494341	+	chr16	32885470	-	35
chr12	82511684	-	chr16	33541520	-	10
chr12	58151777	-	chr17	43293104	-	32
chr12	59775340	-	chr17	43303631	-	11
chr12	69067531	+	chr17	43349241	+	103
chr12	73262802	+	chr18	46830908	-	8
chr12	79031194	+	chr18	48423449	+	9
chr14	36417293	-	chr14	36418525	+	10
chr15	20545523	-	chr15	20547791	+	40
chr15	20581488	+	chr15	20589653	-	8
chr15	77910834	+	chr15	77911228	-	14
chr16	32296593	+	chr16	32656587	+	21
chr16	32297076	+	chr16	33293850	-	10
chr16	33237414	-	chr16	33241269	+	15
chr16	33237424	-	chr16	33294736	+	17
chr16	33237462	-	chr16	33239197	+	9
chr16	33238762	-	chr16	33241249	+	10
chr16	33239329	-	chr16	33294200	+	10
chr16	33239988	+	chr16	33293798	-	9
chr16	33241020	-	chr16	33294389	+	23
chr16	33485953	+	chr16	33486269	-	59
chr16	33974394	+	chr16	33974190	-	9
chr16	33978311	-	chr16	33978844	+	8
chr16	33987103	+	chr16	33988139	-	9
chr17	21548437	+	chr17	21549354	-	7
chr19	54383442	+	chr19	54383692	-	10
chr2	106695029	+	chr2	106695896	-	11
chr2	131886565	-	chr2	131887400	-	7
chr2	142350968	+	chr2	142351360	-	10
chr2	150626984	+	chr2	150627322	-	7
chr2	151903091	+	chr2	151903380	-	12
chr2	152617294	+	chr2	152617603	-	15
chr2	153205326	+	chr2	153205656	-	17
chr2	154411684	+	chr2	154412050	-	7
chr2	158433352	+	chr2	158433662	-	19
chr2	158719089	+	chr2	158719395	-	9
chr2	160855864	+	chr2	160856189	-	17
chr2	161795601	+	chr2	161795931	-	13
chr2	163666411	+	chr2	163666725	-	17
chr2	169395459	+	chr2	169395771	-	13
chr2	170992028	+	chr2	170992329	-	22
chr2	178287636	+	chr2	178288100	-	11
chr2	181925838	+	chr2	181926173	-	10
chr2	182355969	+	chr2	182356285	-	14
chr2	182565257	+	chr2	182565580	-	13
chr2	182856914	+	chr2	182857592	-	7
chr2	184249986	+	chr2	184250327	-	26
chr2	188215728	+	chr2	188216023	-	14
chr2	193355394	+	chr2	193355726	-	20
chr2	196031304	+	chr2	196031629	-	13
chr2	196051825	+	chr2	196052089	-	20
chr2	202721659	+	chr2	202721967	-	16
chr2	206731198	+	chr2	206731503	-	19
chr2	208567223	+	chr2	208567520	-	15
chr2	208959110	+	chr2	208959443	-	16
chr2	209061168	+	chr2	209061499	-	19
chr2	209451720	+	chr2	209452039	-	13
chr2	212551256	+	chr2	212551549	-	15
chr2	214775196	+	chr2	214775515	-	10
chr2	219931790	+	chr2	219932037	-	24
chr2	223797365	+	chr2	223797670	-	12
chr2	227017564	+	chr2	227017824	-	12
chr2	233332710	+	chr2	233333486	-	15
chr2	233364515	+	chr2	233364837	-	9
chr2	233668360	+	chr2	233668694	-	19
chr2	240153396	+	chr2	240153765	-	7
chr2	240640772	-	chr2	240641547	+	10
chr2	240641001	+	chr2	240640757	-	11
chr20	46523460	-	chr20	46524415	+	17
chr3	197110973	-	chr3	197111322	+	7
chr3	197117078	-	chr3	197118095	+	10
chr4	190201048	+	chr20	29653903	+	17
chr4	64519	+	chr4	67891	-	22
chr4	190585812	+	chr4	190613119	+	15
chr4	190624640	+	chr4	190624968	-	13
chr4	190662869	+	chr4	190663735	-	9
chr4	190802395	-	chr4	190802696	+	19
chr5	61293640	+	chr5	61293954	-	12
chr5	62704450	+	chr5	62704766	-	17
chr5	73648986	+	chr5	73649304	-	17
chr5	75082305	+	chr5	75082606	-	14
chr5	77062320	+	chr5	77062625	-	13
chr5	80039371	+	chr5	80039668	-	12
chr5	81182490	+	chr5	81182826	-	13
chr5	82156700	+	chr5	82157025	-	18
chr5	95343330	+	chr5	95343665	-	19
chr5	99608140	+	chr5	99608458	-	19
chr5	114731331	+	chr5	114731634	-	10
chr5	119015143	+	chr5	119015498	-	10
chr5	125346098	-	chr5	141715554	+	7
chr5	126458383	+	chr5	126458818	-	13
chr5	146622593	+	chr5	146623093	-	11
chr5	149746207	+	chr5	149746529	-	14
chr5	158592393	+	chr5	158592734	-	20
chr5	160431312	+	chr5	160431665	-	14
chr5	166294114	+	chr5	166294321	-	7
chr5	166854668	-	chr5	166854949	+	7
chr5	168742487	+	chr5	168742748	-	12
chr5	169405159	+	chr5	178256813	+	7
chr5	169597458	-	chr5	169598793	-	13
chr5	169597702	+	chr5	169598708	+	16
chr5	171514615	+	chr5	171514960	-	7
chr5	172889723	+	chr5	172890062	-	22
chr5	176018803	-	chr5	176018936	+	27
chr5	176507723	+	chr5	176508485	-	17
chr5	177388211	-	chr5	177388799	+	8
chr5	177388743	+	chr5	177401297	-	9
chr5	177721245	+	chr5	177721479	-	11
chr5	178012478	-	chr5	178012744	+	20
chr5	178740206	+	chr5	178740757	-	8
chr5	179056118	-	chr5	179056854	+	13
chr6	57381852	+	chr6	57382106	-	8
chr6	57478157	+	chr6	57478877	-	12
chr6	57583688	+	chr6	57590315	-	11
chr7	507788	+	chr7	507205	-	9
chr7	879156	+	chr7	879477	-	13
chr7	1055756	+	chr7	1056062	-	9
chr7	1320182	+	chr7	1320678	-	8
chr7	5050013	-	chr7	57334799	+	12
chr7	8192185	-	chr7	8192458	+	10
chr7	12024216	+	chr7	12024535	-	7
chr7	12281681	+	chr7	12282035	-	7
chr7	14910401	+	chr7	14910740	-	11
chr7	16936298	+	chr7	16936643	-	17
chr7	24677937	+	chr7	24678256	-	7
chr7	25044589	+	chr7	25044923	-	11
chr7	30535560	+	chr7	30535920	-	11
chr7	33898847	+	chr7	33899169	-	20
chr7	34647730	+	chr7	34648016	-	14
chr7	37477281	+	chr7	37477626	-	14
chr7	37998520	+	chr7	37998823	-	21
chr7	40879366	+	chr7	40880474	+	14
chr7	40879377	-	chr7	40880493	-	11
chr7	52094974	+	chr7	52095273	-	19
chr7	52107120	+	chr7	52107433	-	7
chr7	53196021	+	chr7	53196335	-	16
chr7	55971762	+	chr7	55972157	-	9
chr7	57568828	+	chr7	57569166	-	13
chr7	57957742	+	chr7	57959382	-	17
chr8	46991624	+	chr8	46992415	-	31
chr8	47381325	+	chr8	47381632	-	27
chr8	47405860	+	chr8	47407888	-	37
chr8	49060797	-	chr8	49061181	+	25
chr8	52023768	+	chr8	52024036	-	19
chr8	52061010	+	chr8	52061305	-	15
chr8	52367429	+	chr8	52367686	-	10
chr8	52737943	+	chr8	52738279	-	21
chr8	59078468	+	chr8	59078812	-	29
chr8	72551417	+	chr8	72551733	-	20
chr8	73023623	-	chr8	73023876	-	13
chr8	82046301	+	chr8	82046614	-	21
chr8	85955665	+	chr8	85955988	-	24
chr8	89392211	+	chr8	89392506	-	14
chr8	92152879	+	chr8	92153200	-	11
chr8	95329658	+	chr8	95329960	-	21
chr8	97098090	+	chr8	97098426	-	23
chr8	98595413	+	chr8	98595726	-	31
chr8	98783453	+	chr8	98783776	-	27
chr8	99465173	+	chr8	99465474	-	16
chr8	100157805	+	chr8	100158247	+	15
chr8	100157835	-	chr8	100157947	-	17
chr8	103435478	+	chr8	103435996	+	14
chr8	104382914	+	chr8	104383225	-	11
chr8	106670537	+	chr8	106670841	-	16
chr8	107511100	+	chr8	107511423	-	14
chr8	108120229	+	chr8	108120535	-	23
chr8	112168226	+	chr8	112168573	-	17
chr8	113085440	+	chr8	113085763	-	22
chr8	114934375	+	chr8	114934681	-	21
chr8	118223544	+	chr8	118223820	-	15
chr8	118712796	+	chr8	118713110	-	14
chr8	118980778	+	chr8	118981103	-	30
chr8	119447064	+	chr8	119447353	-	18
chr8	126336756	+	chr8	126337125	-	15
chr8	126681395	+	chr8	126681708	-	22
chr8	132168297	+	chr8	132168602	-	18
chr8	134329467	+	chr8	134329773	-	18
chr8	137716833	+	chr8	137717152	-	12
chr8	138130968	+	chr8	138131555	+	15
chr8	138130978	-	chr8	138131190	-	16
chr8	138200174	+	chr8	138200415	-	19
chr8	138860560	+	chr8	138860877	-	22
chr8	140475273	+	chr8	140475661	-	9
chr8	142447134	+	chr8	142447379	-	12
chr8	142955370	-	chr8	142955787	+	12
chr8	144723613	+	chr8	144723948	-	24
chr8	144751642	-	chr8	144751787	+	25
chr8	145809264	+	chr8	145818163	-	8
chr8	146192868	+	chr8	146193173	-	20
chr9	66462161	+	chr9	66474316	+	13
chr9	66469904	-	chr9	66478638	-	17
chr9	66532393	+	chr9	66533325	-	9
chr9	68421833	+	chr9	68429246	+	8
chr9	68424465	+	chr9	68424733	-	15
chr9	68996448	+	chr9	68997562	-	23
chr9	71665309	+	chr9	71665576	-	15
chr9	71777943	+	chr9	71778241	-	19
chr9	74269392	+	chr9	74269665	-	21
chr9	75669533	+	chr9	75669793	-	17
chr9	78736741	+	chr9	78737031	-	20
chr9	79124508	+	chr9	79124827	-	18
chr9	81725761	+	chr9	81726129	-	9
chr9	82845159	+	chr9	82845520	-	7
chr9	83630458	+	chr9	83630757	-	20
chr9	83967926	+	chr9	83970687	-	15
chr9	84477096	+	chr9	84477400	-	15
chr9	87775154	+	chr9	87776192	-	11
chr9	87901395	+	chr9	87901720	-	7
chr9	89154550	+	chr9	89155942	-	11
chr9	89799084	+	chr9	89799435	-	15
chr9	90859001	+	chr9	90860957	-	14
chr9	90933807	+	chr9	90937520	-	11
chr9	93883379	+	chr9	93883690	-	18
chr9	96470325	+	chr9	96471477	-	13
chr9	96730281	+	chr9	96730591	-	7
chr9	97292929	+	chr9	97293229	-	27
chr9	98266019	+	chr9	98266359	-	12
chr9	99062584	+	chr9	99062914	-	16
chr9	100761073	+	chr9	100761389	-	16
chr9	101309050	+	chr9	101311662	-	13
chr9	104219704	+	chr9	104220373	-	16
chr9	104443983	+	chr9	104444731	-	16
chr9	107816963	+	chr9	107817335	+	7
chr9	109024133	+	chr9	109024434	-	13
chr9	109523017	+	chr9	110073500	-	12
chr9	112430186	+	chr9	112430520	-	8
chr9	115937103	+	chr9	115937382	-	21
chr9	117082012	+	chr9	117083382	-	17
chr9	118109651	+	chr9	118110001	-	20
chr9	119477081	+	chr9	119477398	-	10
chr9	122531824	+	chr9	122532159	-	18
chr9	124411500	+	chr9	124411835	-	10
chr9	130901420	+	chr9	130901218	-	17
chr9	131226953	+	chr9	131227196	-	14
chr9	131412079	+	chr9	131413981	-	7
chr9	132158722	-	chr9	132159108	+	7
chr9	136379214	+	chr9	136379555	-	10
chr9	136414086	+	chr9	136414433	-	17
chr9	136625200	+	chr9	136626289	-	18
chr9	136863652	+	chr9	136863962	-	16
chr9	138214017	+	chr9	138217600	-	8
chr9	138479095	+	chr9	138480198	-	19
chr9	140222123	+	chr9	140222333	-	10
chr9	140222160	-	chr9	140222936	+	36
