# Supplementary material for: GRIDSS: sensitive and specific genomic rearrangement detection using positional de Bruijn graph assembly
Source: HighWire-hosted journal article supplement (doi:10.1101/gr.222109.117), 2017-11-02
Supplement: Supplemental_gridss_source.zip [file mmc4.xlsx]

## Sheet: Summary
Table S3. Related to Figure 3. Locations of contiguous genomic regions (CGRs) and the copy number profile within each CGR in the 778, 449, GOT3, T1000 and LPS141 cell lines.
Sample	No CGRs	No. chr12 CGRs	Median length (kb)	Core donor size (Mb)	Core size (Mb)	Note
778	260	50	35	23.0861	209.383	2 isoforms
449	235	48	45	21.235	269.17	2 isoforms
GOT3	114	48	95	53.2239	412.049	1 isoform
T1000	170	92	62.5	22.845	228.392	2 isoform
LPS141	103	57	30	14.15	150.305	1 isoform
ST059	144	59	30	30.2255	661.858	Unknown number of isoforms possibly >1); total core size shown
ST079	57	46	55	16.995	218.618	Unknown number of isoforms; total core size shown

## Sheet: 778_CGRs
Chromosome	Start	End	CGR name	Length (bp)
chr1	170845000	170880000	chr1_001	35000
chr1	171045000	171110000	chr1_002	65000
chr1	171170000	171225000	chr1_003	55000
chr1	171410000	171435000	chr1_004	25000
chr1	171610000	171625000	chr1_005	15000
chr1	171685000	172835000	chr1_006	1150000
chr1	178245000	178300000	chr1_007	55000
chr1	181830000	181945000	chr1_008	115000
chr1	182310000	182320000	chr1_009	10000
chr1	183830000	183865000	chr1_010	35000
chr1	184095000	184120000	chr1_011	25000
chr1	185365000	185385000	chr1_012	20000
chr1	185680000	185715000	chr1_013	35000
chr1	185750000	186270000	chr1_014	520000
chr1	186280000	186705000	chr1_015	425000
chr1	188015000	188055000	chr1_016	40000
chr1	188190000	189100000	chr1_017	910000
chr1	189535000	189605000	chr1_018	70000
chr1	190730000	190770000	chr1_019	40000
chr1	194785000	194995000	chr1_020	210000
chr10	3260000	3375000	chr10_001	115000
chr10	5145000	5200000	chr10_002	55000
chr10	7865000	8030000	chr10_003	165000
chr10	8040000	8065000	chr10_004	25000
chr10	8160000	8420000	chr10_005	260000
chr10	8435000	8920000	chr10_006	485000
chr10	8975000	8990000	chr10_007	15000
chr10	9195000	9245000	chr10_008	50000
chr10	9430000	9650000	chr10_009	220000
chr10	10505000	11005000	chr10_010	500000
chr10	12115000	12290000	chr10_011	175000
chr10	12465000	12570000	chr10_012	105000
chr12	55380000	55405000	chr12_001	25000
chr12	55735000	55755000	chr12_002	20000
chr12	58005000	58035000	chr12_003	30000
chr12	58050000	58165000	chr12_004	115000
chr12	58540000	58545000	chr12_005	5000
chr12	58920000	58940000	chr12_006	20000
chr12	60540000	60555000	chr12_007	15000
chr12	65025000	65030000	chr12_008	5000
chr12	65860000	66070000	chr12_009	210000
chr12	66205000	66250000	chr12_010	45000
chr12	66500000	66580000	chr12_011	80000
chr12	67060000	67065000	chr12_012	5000
chr12	67860000	67870000	chr12_013	10000
chr12	69075000	69490000	chr12_014	415000
chr12	69505001	70355000	chr12_015	849999
chr12	70360001	70375000	chr12_016	14999
chr12	70380001	70945000	chr12_017	564999
chr12	70970001	71025000	chr12_018	54999
chr12	71030001	71245000	chr12_019	214999
chr12	71280000	71295000	chr12_020	15000
chr12	71410000	71520000	chr12_021	110000
chr12	71600000	71650000	chr12_022	50000
chr12	71685000	71700000	chr12_023	15000
chr12	73360000	73385000	chr12_024	25000
chr12	74220000	74270000	chr12_025	50000
chr12	74315000	74345000	chr12_026	30000
chr12	74425001	74472002	chr12_027	47001
chr12	74478621	74492722	chr12_028	14101
chr12	74865000	74975000	chr12_029	110000
chr12	75545000	75655000	chr12_030	110000
chr12	75660000	75785000	chr12_031	125000
chr12	75835000	75950000	chr12_032	115000
chr12	78850000	78995000	chr12_033	145000
chr12	79110001	79185000	chr12_034	74999
chr12	79195001	79200000	chr12_035	4999
chr12	79735000	79790000	chr12_036	55000
chr12	79810000	79875000	chr12_037	65000
chr12	80040000	80045000	chr12_038	5000
chr12	82460000	82605000	chr12_039	145000
chr12	82660000	82695000	chr12_040	35000
chr12	83545000	83670000	chr12_041	125000
chr12	83700000	83705000	chr12_042	5000
chr12	83785000	83815000	chr12_043	30000
chr12	83905000	84170000	chr12_044	265000
chr12	84185000	84415000	chr12_045	230000
chr12	84485000	84745000	chr12_046	260000
chr12	91635000	91675000	chr12_047	40000
chr12	92845000	93160000	chr12_048	315000
chr12	95300000	95320000	chr12_049	20000
chr12	95330000	95620000	chr12_050	290000
chr13	58570000	58575000	chr13_001	5000
chr13	62120000	62200000	chr13_002	80000
chr13	62205000	62225000	chr13_003	20000
chr13	65965000	66160000	chr13_004	195000
chr13	66175000	66180000	chr13_005	5000
chr13	69390000	69530000	chr13_006	140000
chr13	69585000	69595000	chr13_007	10000
chr13	69795000	69855000	chr13_008	60000
chr13	69860000	69885000	chr13_009	25000
chr13	69925000	69930000	chr13_010	5000
chr13	69940000	70055000	chr13_011	115000
chr13	70270000	70290000	chr13_012	20000
chr13	73700000	73730000	chr13_013	30000
chr13	74160000	74255000	chr13_014	95000
chr13	74305000	74335000	chr13_015	30000
chr13	74560000	74565000	chr13_016	5000
chr13	74590000	74620000	chr13_017	30000
chr13	74660000	74665000	chr13_018	5000
chr13	74720000	74910000	chr13_019	190000
chr13	74920000	74925000	chr13_020	5000
chr13	75080000	75180000	chr13_021	100000
chr13	75355000	75375000	chr13_022	20000
chr13	76105000	76195000	chr13_023	90000
chr13	76430000	76435000	chr13_024	5000
chr13	76505000	76515000	chr13_025	10000
chr13	76555000	76560000	chr13_026	5000
chr13	79440000	79490000	chr13_027	50000
chr13	80040000	80065000	chr13_028	25000
chr13	81925000	81940000	chr13_029	15000
chr13	87605000	87615000	chr13_030	10000
chr13	89285000	89295000	chr13_031	10000
chr13	89320000	89470000	chr13_032	150000
chr13	89475000	89510000	chr13_033	35000
chr13	89805000	89815000	chr13_034	10000
chr13	89820000	89855000	chr13_035	35000
chr13	90755000	90810000	chr13_036	55000
chr13	90845000	90860000	chr13_037	15000
chr13	90985000	91040000	chr13_038	55000
chr13	91250000	91260000	chr13_039	10000
chr13	91870000	91885000	chr13_040	15000
chr13	99875000	99880000	chr13_041	5000
chr13	104610000	104625000	chr13_042	15000
chr13	109805000	109820000	chr13_043	15000
chr13	112715000	112725000	chr13_044	10000
chr15	73950000	74010000	chr15_001	60000
chr15	85260000	85320000	chr15_002	60000
chr15	85325000	85500000	chr15_003	175000
chr15	85540000	85650000	chr15_004	110000
chr15	85665000	85670000	chr15_005	5000
chr15	90870000	90875000	chr15_006	5000
chr15	91245000	91425000	chr15_007	180000
chr15	91450000	91620000	chr15_008	170000
chr15	91995000	92020000	chr15_009	25000
chr15	92300000	93390000	chr15_010	1090000
chr15	96115000	96150000	chr15_011	35000
chr15	96240000	96325000	chr15_012	85000
chr15	97060000	97150000	chr15_013	90000
chr15	98815000	98910000	chr15_014	95000
chr15	98965000	99920000	chr15_015	955000
chr15	100965000	101185000	chr15_016	220000
chr16	47685000	47710000	chr16_001	25000
chr16	48615000	48635000	chr16_002	20000
chr16	49745000	49825000	chr16_003	80000
chr16	49990000	50025000	chr16_004	35000
chr16	56245000	56315000	chr16_005	70000
chr16	58345000	58350000	chr16_006	5000
chr16	58780000	58790000	chr16_007	10000
chr16	61565000	61580000	chr16_008	15000
chr16	62770000	62855000	chr16_009	85000
chr16	62975000	62985000	chr16_010	10000
chr16	62995000	63035000	chr16_011	40000
chr16	66535000	66545000	chr16_012	10000
chr16	70275000	70280000	chr16_013	5000
chr16	85500000	85510000	chr16_014	10000
chr17	35630000	35640000	chr17_001	10000
chr2	156975000	156980000	chr2_001	5000
chr2	158645000	158675000	chr2_002	30000
chr2	158700000	158755000	chr2_003	55000
chr20	410000	580000	chr20_001	170000
chr20	1175000	1180000	chr20_002	5000
chr20	1290000	1460000	chr20_003	170000
chr20	14360000	14615000	chr20_004	255000
chr21	22880000	22890000	chr21_001	10000
chr21	23865000	23875000	chr21_002	10000
chr21	27280000	27320000	chr21_003	40000
chr21	27480000	27500000	chr21_004	20000
chr21	27510000	27635000	chr21_005	125000
chr21	27785000	27805000	chr21_006	20000
chr21	27835000	27840000	chr21_007	5000
chr21	27845000	27855000	chr21_008	10000
chr21	27885000	27900000	chr21_009	15000
chr21	27905000	28015000	chr21_010	110000
chr21	28210000	28215000	chr21_011	5000
chr21	28220000	28445000	chr21_012	225000
chr21	28585000	28600000	chr21_013	15000
chr21	28605000	28660000	chr21_014	55000
chr21	28680000	28705000	chr21_015	25000
chr21	28710000	28725000	chr21_016	15000
chr21	38070000	38120000	chr21_017	50000
chr21	42075000	42170000	chr21_018	95000
chr21	42370000	42450000	chr21_019	80000
chr21	42620000	42635000	chr21_020	15000
chr21	42705000	42740000	chr21_021	35000
chr21	42845000	42865000	chr21_022	20000
chr21	42875000	42885000	chr21_023	10000
chr21	42915000	42960000	chr21_024	45000
chr21	43005000	43110000	chr21_025	105000
chr21	46820000	46825000	chr21_026	5000
chr3	192785000	192795000	chr3_001	10000
chr3	195665000	195670000	chr3_002	5000
chr3	195680000	195710000	chr3_003	30000
chr3	196650000	196675000	chr3_004	25000
chr3	196700000	196725000	chr3_005	25000
chr4	8150000	8245000	chr4_001	95000
chr4	8375000	8395000	chr4_002	20000
chr4	8430000	8445000	chr4_003	15000
chr4	8605000	8615000	chr4_004	10000
chr4	8990000	9150000	chr4_005	160000
chr4	9370000	9395000	chr4_006	25000
chr4	11755000	11845000	chr4_007	90000
chr4	11885000	11975000	chr4_008	90000
chr4	12545000	12730000	chr4_009	185000
chr4	23845000	23975000	chr4_010	130000
chr4	24165000	24235000	chr4_011	70000
chr4	25760000	25770000	chr4_012	10000
chr4	26760000	26800000	chr4_013	40000
chr4	28070000	28080000	chr4_014	10000
chr4	28085000	28140000	chr4_015	55000
chr4	28180000	28190000	chr4_016	10000
chr4	28195000	28360000	chr4_017	165000
chr4	28365000	28415000	chr4_018	50000
chr4	28435000	28515000	chr4_019	80000
chr4	28600000	28725000	chr4_020	125000
chr4	28895000	28905000	chr4_021	10000
chr5	290000	295000	chr5_001	5000
chr5	905000	950000	chr5_002	45000
chr5	1045000	1060000	chr5_003	15000
chr5	1215000	1300000	chr5_004	85000
chr5	1325000	1345000	chr5_005	20000
chr5	1350000	1420000	chr5_006	70000
chr5	21480000	21505000	chr5_007	25000
chr5	21510000	21520000	chr5_008	10000
chr5	24665000	24680000	chr5_009	15000
chr5	24690000	24715000	chr5_010	25000
chr5	39425000	39445000	chr5_011	20000
chr5	39835000	39845000	chr5_012	10000
chr5	41500000	41545000	chr5_013	45000
chr5	41730000	41840000	chr5_014	110000
chr5	41910000	42185000	chr5_015	275000
chr5	134210000	134245000	chr5_016	35000
chr6	45910000	45920000	chr6_001	10000
chr6	46215000	46275000	chr6_002	60000
chr6	46415000	46430000	chr6_003	15000
chr6	46630000	46855000	chr6_004	225000
chr6	46880000	46890000	chr6_005	10000
chr6	114100000	114135000	chr6_006	35000
chr6	114145000	114150000	chr6_007	5000
chr6	114175000	114215000	chr6_008	40000
chr9	78895000	78920000	chr9_001	25000
chr9	79190000	79470000	chr9_002	280000
chr9	79645000	79650000	chr9_003	5000
chr9	79670000	79675000	chr9_004	5000
chr9	80545000	80560000	chr9_005	15000
chr9	80815000	80830000	chr9_006	15000
chr9	80885000	80890000	chr9_007	5000
chr9	82565000	82725000	chr9_008	160000
chr9	83070000	83095000	chr9_009	25000
chr9	83420000	83510000	chr9_010	90000
chr9	84175000	84220000	chr9_011	45000
chr9	85935000	85965000	chr9_012	30000
chr9	86015000	86080000	chr9_013	65000
chr9	86540000	86545000	chr9_014	5000
chr9	86675000	86735000	chr9_015	60000
chr9	86795000	86975000	chr9_016	180000
chr9	87105000	87235000	chr9_017	130000
chr9	87535000	87540000	chr9_018	5000
chrX	31165000	31195000	chrX_001	30000
chrX	31165000	31195000	chrX_001	30000

## Sheet: 449_CGRs
Chromosome	Start	End	CGR name	Length (bp)
chr1	170850000	170875000	chr1_001	25000
chr1	171045000	171110000	chr1_002	65000
chr1	171175000	171225000	chr1_003	50000
chr1	171410000	171435000	chr1_004	25000
chr1	171610000	171625000	chr1_005	15000
chr1	171690000	172025000	chr1_006	335000
chr1	172030000	172830000	chr1_007	800000
chr1	178250000	178300000	chr1_008	50000
chr1	181835000	181945000	chr1_009	110000
chr1	182310000	182320000	chr1_010	10000
chr1	183830000	183865000	chr1_011	35000
chr1	184100000	184120000	chr1_012	20000
chr1	185685000	185715000	chr1_013	30000
chr1	185750000	186270000	chr1_014	520000
chr1	186280000	186665000	chr1_015	385000
chr1	186675000	186705000	chr1_016	30000
chr1	188015000	188055000	chr1_017	40000
chr1	188270000	188370000	chr1_018	100000
chr1	188375000	188445000	chr1_019	70000
chr1	188480000	189100000	chr1_020	620000
chr1	189535000	189605000	chr1_021	70000
chr1	190735000	190765000	chr1_022	30000
chr1	194785000	194995000	chr1_023	210000
chr10	3260000	3375000	chr10_001	115000
chr10	5145000	5200000	chr10_002	55000
chr10	7865000	7950000	chr10_003	85000
chr10	7955000	8025000	chr10_004	70000
chr10	8040000	8060000	chr10_005	20000
chr10	8215000	8420000	chr10_006	205000
chr10	8435000	8520000	chr10_007	85000
chr10	8635000	8750000	chr10_008	115000
chr10	8755000	8915000	chr10_009	160000
chr10	9200000	9240000	chr10_010	40000
chr10	9430000	9645000	chr10_011	215000
chr10	10505000	10695000	chr10_012	190000
chr10	10700000	11005000	chr10_013	305000
chr10	12115000	12290000	chr10_014	175000
chr10	12465000	12570000	chr10_015	105000
chr12	55380000	55405000	chr12_001	25000
chr12	55735000	55750000	chr12_002	15000
chr12	58005000	58035000	chr12_003	30000
chr12	58050000	58165000	chr12_004	115000
chr12	58540000	58545000	chr12_005	5000
chr12	58920000	58935000	chr12_006	15000
chr12	60540000	60555000	chr12_007	15000
chr12	65025000	65030000	chr12_008	5000
chr12	65860000	66070000	chr12_009	210000
chr12	66205000	66250000	chr12_010	45000
chr12	66505000	66575000	chr12_011	70000
chr12	67060000	67065000	chr12_012	5000
chr12	67860000	67865000	chr12_013	5000
chr12	69075000	69485000	chr12_014	410000
chr12	69505000	70355000	chr12_015	850000
chr12	70380000	70945000	chr12_016	565000
chr12	70970000	71025000	chr12_017	55000
chr12	71030000	71245000	chr12_018	215000
chr12	71280000	71295000	chr12_019	15000
chr12	71415000	71515000	chr12_020	100000
chr12	71605000	71650000	chr12_021	45000
chr12	71685000	71700000	chr12_022	15000
chr12	73360000	73385000	chr12_023	25000
chr12	74225000	74270000	chr12_024	45000
chr12	74315000	74345000	chr12_025	30000
chr12	74425000	74495000	chr12_026	70000
chr12	74865000	74975000	chr12_027	110000
chr12	75545000	75655000	chr12_028	110000
chr12	75660000	75785000	chr12_029	125000
chr12	75835000	75950000	chr12_030	115000
chr12	78855000	78990000	chr12_031	135000
chr12	79110000	79185000	chr12_032	75000
chr12	79195000	79200000	chr12_033	5000
chr12	79740000	79785000	chr12_034	45000
chr12	79810000	79875000	chr12_035	65000
chr12	80040000	80045000	chr12_036	5000
chr12	82460000	82600000	chr12_037	140000
chr12	82660000	82695000	chr12_038	35000
chr12	83545000	83665000	chr12_039	120000
chr12	83785000	83810000	chr12_040	25000
chr12	83905000	84065000	chr12_041	160000
chr12	84070000	84170000	chr12_042	100000
chr12	84190000	84415000	chr12_043	225000
chr12	84555000	84745000	chr12_044	190000
chr12	91635000	91670000	chr12_045	35000
chr12	92845000	93160000	chr12_046	315000
chr12	95300000	95320000	chr12_047	20000
chr12	95335000	95620000	chr12_048	285000
chr13	58570000	58575000	chr13_001	5000
chr13	62120000	62200000	chr13_002	80000
chr13	62205000	62220000	chr13_003	15000
chr13	65965000	66160000	chr13_004	195000
chr13	69395000	69525000	chr13_005	130000
chr13	69800000	69850000	chr13_006	50000
chr13	69940000	70050000	chr13_007	110000
chr13	73705000	73730000	chr13_008	25000
chr13	74160000	74255000	chr13_009	95000
chr13	74305000	74335000	chr13_010	30000
chr13	74660000	74665000	chr13_011	5000
chr13	74720000	74910000	chr13_012	190000
chr13	74920000	74925000	chr13_013	5000
chr13	75080000	75175000	chr13_014	95000
chr13	75360000	75370000	chr13_015	10000
chr13	76110000	76190000	chr13_016	80000
chr13	76430000	76435000	chr13_017	5000
chr13	76555000	76560000	chr13_018	5000
chr13	79440000	79485000	chr13_019	45000
chr13	80040000	80060000	chr13_020	20000
chr13	81925000	81935000	chr13_021	10000
chr13	87610000	87615000	chr13_022	5000
chr13	89285000	89295000	chr13_023	10000
chr13	89320000	89470000	chr13_024	150000
chr13	89475000	89510000	chr13_025	35000
chr13	90760000	90810000	chr13_026	50000
chr13	90985000	91035000	chr13_027	50000
chr13	91250000	91260000	chr13_028	10000
chr13	91870000	91885000	chr13_029	15000
chr13	104615000	104625000	chr13_030	10000
chr13	112720000	112725000	chr13_031	5000
chr15	73950000	74005000	chr15_001	55000
chr15	85260000	85285000	chr15_002	25000
chr15	85295000	85315000	chr15_003	20000
chr15	85325000	85470000	chr15_004	145000
chr15	85475000	85500000	chr15_005	25000
chr15	85545000	85645000	chr15_006	100000
chr15	85665000	85670000	chr15_007	5000
chr15	91450000	91535000	chr15_008	85000
chr15	91540000	91620000	chr15_009	80000
chr15	92000000	92020000	chr15_010	20000
chr15	92300000	92405000	chr15_011	105000
chr15	92410000	93390000	chr15_012	980000
chr15	96120000	96145000	chr15_013	25000
chr15	96240000	96320000	chr15_014	80000
chr15	97060000	97145000	chr15_015	85000
chr15	98815000	98910000	chr15_016	95000
chr15	98965000	99915000	chr15_017	950000
chr15	100970000	101180000	chr15_018	210000
chr16	48615000	48635000	chr16_001	20000
chr16	49745000	49820000	chr16_002	75000
chr16	49990000	50020000	chr16_003	30000
chr16	56245000	56315000	chr16_004	70000
chr16	58345000	58350000	chr16_005	5000
chr16	62770000	62855000	chr16_006	85000
chr16	62975000	62985000	chr16_007	10000
chr16	63000000	63030000	chr16_008	30000
chr16	70275000	70280000	chr16_009	5000
chr17	35630000	35640000	chr17_001	10000
chr2	156975000	156980000	chr2_001	5000
chr2	158645000	158670000	chr2_002	25000
chr2	158705000	158750000	chr2_003	45000
chr20	410000	580000	chr20_001	170000
chr20	1290000	1460000	chr20_002	170000
chr20	14365000	14615000	chr20_003	250000
chr21	27295000	27315000	chr21_001	20000
chr21	27485000	27495000	chr21_002	10000
chr21	27510000	27635000	chr21_003	125000
chr21	27785000	27800000	chr21_004	15000
chr21	27845000	27855000	chr21_005	10000
chr21	27885000	27900000	chr21_006	15000
chr21	27905000	28015000	chr21_007	110000
chr21	28220000	28440000	chr21_008	220000
chr21	28585000	28595000	chr21_009	10000
chr21	28605000	28655000	chr21_010	50000
chr21	28685000	28705000	chr21_011	20000
chr21	28715000	28725000	chr21_012	10000
chr21	38070000	38120000	chr21_013	50000
chr21	42080000	42170000	chr21_014	90000
chr21	42370000	42450000	chr21_015	80000
chr21	42620000	42635000	chr21_016	15000
chr21	42710000	42740000	chr21_017	30000
chr21	42845000	42865000	chr21_018	20000
chr21	42880000	42885000	chr21_019	5000
chr21	42930000	42955000	chr21_020	25000
chr21	43005000	43110000	chr21_021	105000
chr3	195665000	195670000	chr3_001	5000
chr3	195680000	195710000	chr3_002	30000
chr3	196655000	196675000	chr3_003	20000
chr3	196700000	196710000	chr3_004	10000
chr4	8150000	8240000	chr4_001	90000
chr4	8375000	8395000	chr4_002	20000
chr4	8430000	8440000	chr4_003	10000
chr4	8605000	8615000	chr4_004	10000
chr4	8995000	9145000	chr4_005	150000
chr4	9370000	9395000	chr4_006	25000
chr4	11755000	11840000	chr4_007	85000
chr4	11890000	11975000	chr4_008	85000
chr4	12545000	12730000	chr4_009	185000
chr4	23845000	23970000	chr4_010	125000
chr4	24170000	24195000	chr4_011	25000
chr4	24200000	24225000	chr4_012	25000
chr4	25760000	25770000	chr4_013	10000
chr4	26760000	26795000	chr4_014	35000
chr4	28085000	28135000	chr4_015	50000
chr4	28180000	28185000	chr4_016	5000
chr4	28195000	28360000	chr4_017	165000
chr4	28435000	28515000	chr4_018	80000
chr4	28600000	28725000	chr4_019	125000
chr4	28895000	28900000	chr4_020	5000
chr5	290000	295000	chr5_001	5000
chr5	905000	945000	chr5_002	40000
chr5	1045000	1055000	chr5_003	10000
chr5	1215000	1300000	chr5_004	85000
chr5	1325000	1345000	chr5_005	20000
chr5	1350000	1420000	chr5_006	70000
chr5	21480000	21500000	chr5_007	20000
chr5	24665000	24680000	chr5_008	15000
chr5	24695000	24715000	chr5_009	20000
chr5	39425000	39440000	chr5_010	15000
chr5	41500000	41545000	chr5_011	45000
chr5	41730000	41840000	chr5_012	110000
chr5	41910000	42185000	chr5_013	275000
chr6	45910000	45920000	chr6_001	10000
chr6	46415000	46430000	chr6_002	15000
chr6	46630000	46855000	chr6_003	225000
chr6	46880000	46890000	chr6_004	10000
chr6	114105000	114135000	chr6_005	30000
chr6	114175000	114215000	chr6_006	40000
chr7	20740000	20745000	chr7_001	5000
chr9	78895000	78920000	chr9_001	25000
chr9	79195000	79285000	chr9_002	90000
chr9	79290000	79470000	chr9_003	180000
chr9	79670000	79675000	chr9_004	5000
chr9	80550000	80555000	chr9_005	5000
chr9	80815000	80830000	chr9_006	15000
chr9	80885000	80890000	chr9_007	5000
chr9	82565000	82720000	chr9_008	155000
chr9	83075000	83090000	chr9_009	15000
chr9	83425000	83505000	chr9_010	80000
chr9	84175000	84215000	chr9_011	40000
chr9	85935000	85960000	chr9_012	25000
chr9	86015000	86035000	chr9_013	20000
chr9	86040000	86080000	chr9_014	40000
chr9	86675000	86735000	chr9_015	60000
chr9	86795000	86975000	chr9_016	180000
chr9	87105000	87115000	chr9_017	10000
chr9	87120000	87235000	chr9_018	115000
chrX	31165000	31195000	chrX_001	30000

## Sheet: GOT3_CGRs
Chromosome	Start	End	CGR name	Length (bp)
chr1	87010000	87145000	chr1_001	135000
chr1	87150000	87185000	chr1_002	35000
chr1	142971124	149915069	chr1_003	6943945
chr1	165965000	166230000	chr1_004	265000
chr1	166455000	166500000	chr1_005	45000
chr1	166575000	166580000	chr1_006	5000
chr1	166660000	166855000	chr1_007	195000
chr1	166890000	166910000	chr1_008	20000
chr1	167120000	174220000	chr1_009	7100000
chr1	174405000	174560000	chr1_010	155000
chr1	174565000	175070000	chr1_011	505000
chr1	175075000	176225000	chr1_012	1150000
chr1	176230000	178125000	chr1_013	1895000
chr1	178265000	178505000	chr1_014	240000
chr1	182585000	183220000	chr1_015	635000
chr1	184970000	187485000	chr1_016	2515000
chr1	193650000	193855000	chr1_017	205000
chr1	200650000	200710000	chr1_018	60000
chr1	200760000	201865000	chr1_019	1105000
chr1	202215000	202270000	chr1_020	55000
chr1	206555000	206585000	chr1_021	30000
chr1	209755000	209770000	chr1_022	15000
chr1	211300000	211420000	chr1_023	120000
chr1	214900000	215060000	chr1_024	160000
chr1	215075000	215335000	chr1_025	260000
chr1	215380000	215425000	chr1_026	45000
chr1	215640000	215885000	chr1_027	245000
chr1	218010000	218060000	chr1_028	50000
chr1	219305000	219380000	chr1_029	75000
chr1	221175000	221220000	chr1_030	45000
chr1	222910000	222975000	chr1_031	65000
chr1	226935000	226985000	chr1_032	50000
chr1	227035000	227615000	chr1_033	580000
chr1	228770000	228775000	chr1_034	5000
chr1	228780000	230355000	chr1_035	1575000
chr1	231560000	233045000	chr1_036	1485000
chr1	238180000	238670000	chr1_037	490000
chr1	240345000	240350000	chr1_038	5000
chr1	240355000	241775000	chr1_039	1420000
chr1	243960000	244735000	chr1_040	775000
chr1	244850000	244870000	chr1_041	20000
chr1	245275000	245380000	chr1_042	105000
chr1	246845000	246900000	chr1_043	55000
chr1	246910000	247245000	chr1_044	335000
chr1	247305000	247870000	chr1_045	565000
chr1	247930000	248555000	chr1_046	625000
chr12	37855000	37870000	chr12_001	15000
chr12	38495000	38580000	chr12_002	85000
chr12	38590000	38700000	chr12_003	110000
chr12	39945000	41525000	chr12_004	1580000
chr12	41965000	42300000	chr12_005	335000
chr12	42335000	45195000	chr12_006	2860000
chr12	49590000	49775000	chr12_007	185000
chr12	51305000	51550000	chr12_008	245000
chr12	57610000	60090000	chr12_009	2480000
chr12	60620000	60660000	chr12_010	40000
chr12	62105000	62670000	chr12_011	565000
chr12	62680000	62685000	chr12_012	5000
chr12	62920000	63310000	chr12_013	390000
chr12	63400000	63430000	chr12_014	30000
chr12	63485000	63725000	chr12_015	240000
chr12	64370000	64870000	chr12_016	500000
chr12	65080000	65195000	chr12_017	115000
chr12	65365000	65445000	chr12_018	80000
chr12	65460000	65760000	chr12_019	300000
chr12	65780000	65790000	chr12_020	10000
chr12	65835000	65845000	chr12_021	10000
chr12	66150000	66240000	chr12_022	90000
chr12	66315000	66355000	chr12_023	40000
chr12	66385000	66415000	chr12_024	30000
chr12	66420000	67495000	chr12_025	1075000
chr12	67565000	67635000	chr12_026	70000
chr12	67665000	68145000	chr12_027	480000
chr12	68160000	68590000	chr12_028	430000
chr12	68600000	70340000	chr12_029	1740000
chr12	70375000	73265000	chr12_030	2890000
chr12	73290000	73305000	chr12_031	15000
chr12	73310000	73335000	chr12_032	25000
chr12	73430000	73435000	chr12_033	5000
chr12	73510000	73590000	chr12_034	80000
chr12	73610000	73625000	chr12_035	15000
chr12	74060000	74110000	chr12_036	50000
chr12	74125000	74130000	chr12_037	5000
chr12	74585000	74645000	chr12_038	60000
chr12	74650000	74875000	chr12_039	225000
chr12	76085000	76260000	chr12_040	175000
chr12	76480000	76610000	chr12_041	130000
chr12	76710000	76725000	chr12_042	15000
chr12	77010000	77025000	chr12_043	15000
chr12	77055000	77065000	chr12_044	10000
chr12	77125000	77135000	chr12_045	10000
chr12	77160000	77430000	chr12_046	270000
chr12	77645000	77660000	chr12_047	15000
chr12	77875000	78080000	chr12_048	205000
chr13	93805000	93815000	chr13_001	10000
chr13	94175000	94415000	chr13_002	240000
chr13	94445000	94835000	chr13_003	390000
chr13	95065000	95100000	chr13_004	35000
chr13	95275000	95425000	chr13_005	150000
chr13	96440000	96475000	chr13_006	35000
chr13	96635000	96665000	chr13_007	30000
chr13	96930000	96980000	chr13_008	50000
chr13	97165000	97170000	chr13_009	5000
chr13	97470000	97890000	chr13_010	420000
chr13	97935000	97990000	chr13_011	55000
chr13	98010000	98065000	chr13_012	55000
chr13	98120000	98220000	chr13_013	100000
chr13	98360000	98400000	chr13_014	40000
chr13	98695000	98730000	chr13_015	35000
chr13	98775000	98825000	chr13_016	50000
chr16	34670000	34675000	chr16_001	5000
chr17	81180000	81185000	chr17_001	5000
chr8	660000	1345000	chr8_001	685000
chr8	1355000	1370000	chr8_002	15000

## Sheet: T1000_CGRs
Chromosome	Start	End	CGR name	Length (bp)
chr10	10120000	10295000	chr10_001	175000
chr10	10520000	10635000	chr10_002	115000
chr10	10720000	10790000	chr10_003	70000
chr10	10845000	10890000	chr10_004	45000
chr10	10925000	11060000	chr10_005	135000
chr10	11120000	11235000	chr10_006	115000
chr10	11260000	11365000	chr10_007	105000
chr10	11490000	11510000	chr10_008	20000
chr10	12045000	12050000	chr10_009	5000
chr10	12190000	12445000	chr10_010	255000
chr10	12545000	12570000	chr10_011	25000
chr10	12595000	12620000	chr10_012	25000
chr10	12625000	12705000	chr10_013	80000
chr10	12725000	12790000	chr10_014	65000
chr10	12920000	12950000	chr10_015	30000
chr10	13030000	13050000	chr10_016	20000
chr10	13380000	13520000	chr10_017	140000
chr10	13940000	15545000	chr10_018	1605000
chr10	16035000	16135000	chr10_019	100000
chr10	16250000	16365000	chr10_020	115000
chr10	17330000	17370000	chr10_021	40000
chr10	17380000	17410000	chr10_022	30000
chr10	17740000	17780000	chr10_023	40000
chr10	17840000	17855000	chr10_024	15000
chr10	17885000	17890000	chr10_025	5000
chr10	17925000	17930000	chr10_026	5000
chr10	18475000	18595000	chr10_027	120000
chr10	18630000	18660000	chr10_028	30000
chr10	19640000	19710000	chr10_029	70000
chr10	20185000	20265000	chr10_030	80000
chr10	20290000	20395000	chr10_031	105000
chr10	20895000	20990000	chr10_032	95000
chr10	21110000	21330000	chr10_033	220000
chr10	21760000	21945000	chr10_034	185000
chr10	22135000	22175000	chr10_035	40000
chr10	22195000	22205000	chr10_036	10000
chr10	22345000	22410000	chr10_037	65000
chr10	22420000	22425000	chr10_038	5000
chr10	22560000	22670000	chr10_039	110000
chr10	22695000	22725000	chr10_040	30000
chr10	22975000	23060000	chr10_041	85000
chr10	23160000	23235000	chr10_042	75000
chr10	23245000	23270000	chr10_043	25000
chr10	26650000	26880000	chr10_044	230000
chr10	27055000	27090000	chr10_045	35000
chr10	27375000	27385000	chr10_046	10000
chr10	27545000	27590000	chr10_047	45000
chr10	27605000	27645000	chr10_048	40000
chr10	27680000	27770000	chr10_049	90000
chr10	27930000	28015000	chr10_050	85000
chr10	28205000	28300000	chr10_051	95000
chr10	32360000	32370000	chr10_052	10000
chr10	32385000	32405000	chr10_053	20000
chr10	33555000	33640000	chr10_054	85000
chr10	33715000	33800000	chr10_055	85000
chr10	33805000	34025000	chr10_056	220000
chr10	34070000	34125000	chr10_057	55000
chr10	34175000	34200000	chr10_058	25000
chr10	34225000	34285000	chr10_059	60000
chr10	34315000	34430000	chr10_060	115000
chr10	34435000	34455000	chr10_061	20000
chr10	34460000	34510000	chr10_062	50000
chr10	34525000	34535000	chr10_063	10000
chr10	34910000	34960000	chr10_064	50000
chr10	35525000	35535000	chr10_065	10000
chr10	35575000	35580000	chr10_066	5000
chr10	37595000	37855000	chr10_067	260000
chr10	37930000	37955000	chr10_068	25000
chr12	39190000	39195000	chr12_001	5000
chr12	39200000	39205000	chr12_002	5000
chr12	39240000	39255000	chr12_003	15000
chr12	41110000	41125000	chr12_004	15000
chr12	41150000	41155000	chr12_005	5000
chr12	41240000	41405000	chr12_006	165000
chr12	41465000	41515000	chr12_007	50000
chr12	41800000	41965000	chr12_008	165000
chr12	42310000	42390000	chr12_009	80000
chr12	43405000	43545000	chr12_010	140000
chr12	44225000	44315000	chr12_011	90000
chr12	44540000	44625000	chr12_012	85000
chr12	45215000	45765000	chr12_013	550000
chr12	45770000	45780000	chr12_014	10000
chr12	45810000	45855000	chr12_015	45000
chr12	45865000	45945000	chr12_016	80000
chr12	45970000	45985000	chr12_017	15000
chr12	46020000	46125000	chr12_018	105000
chr12	47400000	47430000	chr12_019	30000
chr12	47760000	48040000	chr12_020	280000
chr12	48240000	48250000	chr12_021	10000
chr12	48930000	48945000	chr12_022	15000
chr12	48975000	49110000	chr12_023	135000
chr12	49215000	49220000	chr12_024	5000
chr12	49885000	50045000	chr12_025	160000
chr12	50055000	50080000	chr12_026	25000
chr12	50125000	50170000	chr12_027	45000
chr12	50620000	50710000	chr12_028	90000
chr12	50835000	50865000	chr12_029	30000
chr12	51005000	51150000	chr12_030	145000
chr12	51835000	51915000	chr12_031	80000
chr12	52125000	52150000	chr12_032	25000
chr12	52345000	52375000	chr12_033	30000
chr12	52400000	52525000	chr12_034	125000
chr12	52540000	52560000	chr12_035	20000
chr12	52595000	52670000	chr12_036	75000
chr12	54180000	54245000	chr12_037	65000
chr12	54450000	54675000	chr12_038	225000
chr12	54740000	54845000	chr12_039	105000
chr12	54910000	54950000	chr12_040	40000
chr12	55495000	55515000	chr12_041	20000
chr12	55690000	55735000	chr12_042	45000
chr12	56905000	56910000	chr12_043	5000
chr12	57085000	57145000	chr12_044	60000
chr12	57210000	57300000	chr12_045	90000
chr12	57485000	57520000	chr12_046	35000
chr12	57945000	58240000	chr12_047	295000
chr12	58475000	58495000	chr12_048	20000
chr12	59530000	59620000	chr12_049	90000
chr12	59800000	60265000	chr12_050	465000
chr12	61015000	61040000	chr12_051	25000
chr12	62775000	62835000	chr12_052	60000
chr12	64645000	64735000	chr12_053	90000
chr12	64740000	64780000	chr12_054	40000
chr12	65120000	65515000	chr12_055	395000
chr12	65540000	65575000	chr12_056	35000
chr12	65590000	65730000	chr12_057	140000
chr12	65870000	65905000	chr12_058	35000
chr12	66165000	66340000	chr12_059	175000
chr12	66375000	66415000	chr12_060	40000
chr12	66470000	66505000	chr12_061	35000
chr12	69010000	71070000	chr12_062	2060000
chr12	71850000	71870000	chr12_063	20000
chr12	80445000	80450000	chr12_064	5000
chr12	83700000	83705000	chr12_065	5000
chr12	83710000	83720000	chr12_066	10000
chr12	87395000	87710000	chr12_067	315000
chr12	88070000	88905000	chr12_068	835000
chr12	91000000	93115000	chr12_069	2115000
chr12	93140000	93305000	chr12_070	165000
chr12	93315000	93335000	chr12_071	20000
chr12	93610000	93635000	chr12_072	25000
chr12	93685000	93790000	chr12_073	105000
chr12	93815000	93930000	chr12_074	115000
chr12	94020000	94230000	chr12_075	210000
chr12	96795000	96915000	chr12_076	120000
chr12	97190000	97405000	chr12_077	215000
chr12	108735000	108740000	chr12_078	5000
chr12	112530000	112540000	chr12_079	10000
chr12	115420000	115900000	chr12_080	480000
chr12	115915000	115925000	chr12_081	10000
chr12	118900000	118950000	chr12_082	50000
chr12	118970000	119155000	chr12_083	185000
chr12	119240000	119335000	chr12_084	95000
chr12	121740000	121760000	chr12_085	20000
chr12	121820000	122025000	chr12_086	205000
chr12	122375000	122420000	chr12_087	45000
chr12	122425000	122440000	chr12_088	15000
chr12	122615000	122620000	chr12_089	5000
chr12	122645000	123215000	chr12_090	570000
chr12	123335000	123340000	chr12_091	5000
chr12	123345000	123535000	chr12_092	190000
chr13	110060000	110435000	chr13_001	375000
chr13	110440000	110910000	chr13_002	470000
chr13	111420000	112065000	chr13_003	645000
chr13	112965000	113050000	chr13_004	85000
chr17	63155000	63555000	chr17_001	400000
chr17	63560000	63705000	chr17_002	145000
chr17	67280000	67605000	chr17_003	325000
chr17	67615000	67725000	chr17_004	110000
chr4	25000	30000	chr4_001	5000
chr4	191025000	191035000	chr4_002	10000

## Sheet: LPS141_CGRs
Chromosome	Start	End	CGR name	Length (bp)
chr1	150540000	150610000	chr1_001	70000
chr1	151675000	151700000	chr1_002	25000
chr1	160760000	161375000	chr1_003	615000
chr1	161395000	161405000	chr1_004	10000
chr1	161785000	161975000	chr1_005	190000
chr1	162010000	162050000	chr1_006	40000
chr1	163205000	163585000	chr1_007	380000
chr1	164130000	164430000	chr1_008	300000
chr1	164480000	164910000	chr1_009	430000
chr1	166515000	166935000	chr1_010	420000
chr1	167040000	167045000	chr1_011	5000
chr1	168750000	168765000	chr1_012	15000
chr1	168900000	168905000	chr1_013	5000
chr1	169185000	169225000	chr1_014	40000
chr1	169245000	169335000	chr1_015	90000
chr1	169450000	169460000	chr1_016	10000
chr1	171235000	171340000	chr1_017	105000
chr1	171455000	171660000	chr1_018	205000
chr1	171665000	172005000	chr1_019	340000
chr1	172010000	172025000	chr1_020	15000
chr1	172035000	172305000	chr1_021	270000
chr1	172695000	172790000	chr1_022	95000
chr1	173455000	173475000	chr1_023	20000
chr1	173490000	173495000	chr1_024	5000
chr10	44745000	44750000	chr10_001	5000
chr10	46325000	46330000	chr10_002	5000
chr10	48325000	48370000	chr10_003	45000
chr10	48420000	48440000	chr10_004	20000
chr10	51590000	51600000	chr10_005	10000
chr10	66305000	66410000	chr10_006	105000
chr12	39215000	39220000	chr12_001	5000
chr12	39270000	39325000	chr12_002	55000
chr12	43490000	43515000	chr12_003	25000
chr12	43540000	43545000	chr12_004	5000
chr12	43600000	43645000	chr12_005	45000
chr12	43740000	43940000	chr12_006	200000
chr12	50520000	50555000	chr12_007	35000
chr12	50845000	50850000	chr12_008	5000
chr12	50885000	51335000	chr12_009	450000
chr12	55995000	56000000	chr12_010	5000
chr12	57885000	57995000	chr12_011	110000
chr12	58045000	58165000	chr12_012	120000
chr12	58210000	58325000	chr12_013	115000
chr12	59710000	59730000	chr12_014	20000
chr12	59735000	60300000	chr12_015	565000
chr12	61325000	61455000	chr12_016	130000
chr12	61670000	61680000	chr12_017	10000
chr12	61965000	61970000	chr12_018	5000
chr12	61995000	62005000	chr12_019	10000
chr12	62075000	62090000	chr12_020	15000
chr12	62145000	62175000	chr12_021	30000
chr12	62520000	62530000	chr12_022	10000
chr12	64485000	64490000	chr12_023	5000
chr12	64900000	64905000	chr12_024	5000
chr12	64915000	64970000	chr12_025	55000
chr12	65175000	65275000	chr12_026	100000
chr12	65280000	65505000	chr12_027	225000
chr12	65525000	65620000	chr12_028	95000
chr12	65755000	65765000	chr12_029	10000
chr12	66060000	66365000	chr12_030	305000
chr12	66440000	66465000	chr12_031	25000
chr12	67335000	68995000	chr12_032	1660000
chr12	69010000	69615000	chr12_033	605000
chr12	69720000	69740000	chr12_034	20000
chr12	69860000	70275000	chr12_035	415000
chr12	70430000	70470000	chr12_036	40000
chr12	70695000	72395000	chr12_037	1700000
chr12	72470000	73365000	chr12_038	895000
chr12	74320000	74330000	chr12_039	10000
chr12	74565000	74570000	chr12_040	5000
chr12	76270000	76350000	chr12_041	80000
chr12	77015000	77020000	chr12_042	5000
chr12	77120000	77135000	chr12_043	15000
chr12	78540000	78550000	chr12_044	10000
chr12	78655000	78665000	chr12_045	10000
chr12	78675000	79095000	chr12_046	420000
chr12	80295000	80310000	chr12_047	15000
chr12	80400000	80445000	chr12_048	45000
chr12	82470000	82600000	chr12_049	130000
chr12	84475000	84555000	chr12_050	80000
chr12	84650000	84785000	chr12_051	135000
chr12	85205000	85210000	chr12_052	5000
chr12	85360000	85370000	chr12_053	10000
chr12	86525000	86535000	chr12_054	10000
chr12	87125000	87130000	chr12_055	5000
chr12	88175000	88275000	chr12_056	100000
chr12	88480000	88485000	chr12_057	5000
chr16	32290000	32300000	chr16_001	10000
chr16	32605000	32660000	chr16_002	55000
chr16	32815000	32865000	chr16_003	50000
chr16	32870000	32890000	chr16_004	20000
chr16	33235000	33245000	chr16_005	10000
chr16	33290000	33635000	chr16_006	345000
chr16	33705000	33725000	chr16_007	20000
chr16	33730000	33755000	chr16_008	25000
chr16	33760000	33790000	chr16_009	30000
chr16	71085000	71090000	chr16_010	5000
chr17	43255000	43350000	chr17_001	95000
chr18	46830000	46835000	chr18_001	5000
chr18	48380000	48720000	chr18_002	340000
chr18	62250000	62260000	chr18_003	10000
chr2	98175000	98180000	chr2_001	5000
chr2	106920000	106930000	chr2_002	10000

## Sheet: ST059_CGRs
Chromosome	Start	End	CGR name	Length (bp)
chr10	46955000	47060000	chr10_001	105000
chr12	43435000	43540000	chr12_001	105000
chr12	52660000	52665000	chr12_002	5000
chr12	55225000	55230000	chr12_003	5000
chr12	55330000	55575000	chr12_004	245000
chr12	55660000	55760000	chr12_005	100000
chr12	55765000	55800000	chr12_006	35000
chr12	58040000	58580000	chr12_007	540000
chr12	58585000	58680000	chr12_008	95000
chr12	58695000	58710000	chr12_009	15000
chr12	59070000	59075000	chr12_010	5000
chr12	59205000	59280000	chr12_011	75000
chr12	59285000	59300000	chr12_012	15000
chr12	59385000	59390000	chr12_013	5000
chr12	61485000	61600000	chr12_014	115000
chr12	63770000	64465000	chr12_015	695000
chr12	64515000	64525000	chr12_016	10000
chr12	65605000	66350000	chr12_017	745000
chr12	66365001	66375000	chr12_018	9999
chr12	66395000	66435000	chr12_019	40000
chr12	66465000	66480000	chr12_020	15000
chr12	69015000	71360000	chr12_021	2345000
chr12	71420000	71605000	chr12_022	185000
chr12	71680000	71805000	chr12_023	125000
chr12	73995000	74005000	chr12_024	10000
chr12	74018313	74024651	chr12_025	6338
chr12	74025633	74039800	chr12_026	14167
chr12	74045001	74050000	chr12_027	4999
chr12	74445000	74450000	chr12_028	5000
chr12	75575000	75590000	chr12_029	15000
chr12	75820000	75930000	chr12_030	110000
chr12	75935000	75940000	chr12_031	5000
chr12	77575000	77590000	chr12_032	15000
chr12	80210000	80225000	chr12_033	15000
chr12	80405000	83850000	chr12_034	3445000
chr12	83865000	83940000	chr12_035	75000
chr12	84885000	84905000	chr12_036	20000
chr12	85550000	85580000	chr12_037	30000
chr12	85595000	91460000	chr12_038	5865000
chr12	91760000	92220000	chr12_039	460000
chr12	92480000	92800000	chr12_040	320000
chr12	92805000	92820000	chr12_041	15000
chr12	94260000	94270000	chr12_042	10000
chr12	95195000	96795000	chr12_043	1600000
chr12	100655000	100665000	chr12_044	10000
chr12	101305000	101405000	chr12_045	100000
chr12	101490000	101505000	chr12_046	15000
chr12	101750000	101765000	chr12_047	15000
chr12	101780000	101785000	chr12_048	5000
chr12	102330000	102340000	chr12_049	10000
chr12	102365000	102390000	chr12_050	25000
chr12	104745000	104770000	chr12_051	25000
chr12	104855000	104865000	chr12_052	10000
chr12	104965000	104980000	chr12_053	15000
chr12	105395000	105460000	chr12_054	65000
chr12	105465000	105470000	chr12_055	5000
chr12	105510000	105520000	chr12_056	10000
chr12	105920000	106215000	chr12_057	295000
chr12	106225000	106230000	chr12_058	5000
chr12	106365000	106375000	chr12_059	10000
chr14	77735000	77740000	chr14_001	5000
chr14	99885000	99890000	chr14_002	5000
chr16	23650000	23655000	chr16_001	5000
chr18	23935000	23990000	chr18_001	55000
chr18	24030000	24125000	chr18_002	95000
chr18	25320000	25335000	chr18_003	15000
chr18	25725000	25755000	chr18_004	30000
chr18	25760000	25765000	chr18_005	5000
chr18	25805000	25810000	chr18_006	5000
chr18	32335000	32490000	chr18_007	155000
chr18	33535000	33540000	chr18_008	5000
chr18	33880000	33915000	chr18_009	35000
chr18	35730000	36550000	chr18_010	820000
chr19	6070000	6075000	chr19_001	5000
chr19	9295000	9710000	chr19_002	415000
chr19	12820000	12830000	chr19_003	10000
chr19	23915000	23930000	chr19_004	15000
chr19	30200000	30205000	chr19_005	5000
chr19	33680000	33715000	chr19_006	35000
chr19	42830000	42875000	chr19_007	45000
chr19	42945000	42980000	chr19_008	35000
chr19	49655000	49660000	chr19_009	5000
chr19	56835000	56855000	chr19_010	20000
chr19	56860000	56960000	chr19_011	100000
chr19	57000000	57010000	chr19_012	10000
chr2	223730000	223735000	chr2_001	5000
chr20	45585000	45595000	chr20_001	10000
chr21	11010000	11190000	chr21_001	180000
chr21	23470000	23480000	chr21_002	10000
chr21	26100000	26185000	chr21_003	85000
chr21	27745000	27760000	chr21_004	15000
chr21	29295000	29300000	chr21_005	5000
chr21	36095000	36115000	chr21_006	20000
chr3	75995000	76000000	chr3_001	5000
chr4	47065000	47090000	chr4_001	25000
chr4	48115000	48130000	chr4_002	15000
chr4	140955000	140960000	chr4_003	5000
chr6	295000	380000	chr6_001	85000
chr7	105740000	105745000	chr7_001	5000
chr7	151975000	151985000	chr7_002	10000
chr8	108315000	108370000	chr8_001	55000
chr8	108595000	108600000	chr8_002	5000
chr8	108605000	108675000	chr8_003	70000
chr8	140470000	140475000	chr8_004	5000
chr9	71730000	71785000	chr9_001	55000
chr9	72910000	72925000	chr9_002	15000
chr9	74690000	74810000	chr9_003	120000
chr9	75170000	76935000	chr9_004	1765000
chr9	82855000	82940000	chr9_005	85000
chr9	84500000	85895000	chr9_006	1395000
chr9	85980000	86025000	chr9_007	45000
chr9	87115000	87140000	chr9_008	25000
chr9	87255000	87875000	chr9_009	620000
chr9	88105000	88120000	chr9_010	15000
chr9	88200000	88250000	chr9_011	50000
chr9	89800000	89905000	chr9_012	105000
chr9	103670000	103675000	chr9_013	5000
chr9	108095000	108970000	chr9_014	875000
chr9	109165000	109195000	chr9_015	30000
chr9	113560000	113795000	chr9_016	235000
chr9	114435000	114795000	chr9_017	360000
chr9	117615000	117655000	chr9_018	40000
chr9	120050000	120335000	chr9_019	285000
chr9	121235000	121560000	chr9_020	325000
chr9	121565000	122540000	chr9_021	975000
chr9	122845000	122930000	chr9_022	85000
chr9	124865000	125215000	chr9_023	350000
chr9	126430000	126680000	chr9_024	250000
chr9	126810000	126875000	chr9_025	65000
chr9	127245000	127355000	chr9_026	110000
chr9	128915000	129035000	chr9_027	120000
chr9	129680000	129985000	chr9_028	305000
chr9	130690000	130730000	chr9_029	40000
chr9	132180000	132265000	chr9_030	85000
chr9	132390000	132420000	chr9_031	30000
chr9	132610000	132615000	chr9_032	5000
chr9	134295000	134405000	chr9_033	110000
chr9	135480000	135560000	chr9_034	80000
chr9	136360000	136365000	chr9_035	5000
chr9	136500000	136625000	chr9_036	125000
chr9	136765000	136850000	chr9_037	85000
chr9	138375000	138415000	chr9_038	40000
chr9	139710000	139715000	chr9_039	5000
chr9	139910000	139970000	chr9_040	60000

## Sheet: ST079_CGRs
Chromosome	Start	End	CGR name	Length (bp)
chr12	58120000	59740000	chr12_001	1620000
chr12	66215000	66355000	chr12_002	140000
chr12	69075000	70520000	chr12_003	1445000
chr12	70525000	70970000	chr12_004	445000
chr12	71010000	71285000	chr12_005	275000
chr12	71845000	71855000	chr12_006	10000
chr12	72350000	72380000	chr12_007	30000
chr12	72455000	72485000	chr12_008	30000
chr12	72495000	72655000	chr12_009	160000
chr12	72665000	73180000	chr12_010	515000
chr12	73475000	73925000	chr12_011	450000
chr12	74415000	74530000	chr12_012	115000
chr12	75805000	75935000	chr12_013	130000
chr12	76025000	76070000	chr12_014	45000
chr12	76105000	76115000	chr12_015	10000
chr12	77080000	78555000	chr12_016	1475000
chr12	80760000	80785000	chr12_017	25000
chr12	80900000	80945000	chr12_018	45000
chr12	81875000	81880000	chr12_019	5000
chr12	82410000	82420000	chr12_020	10000
chr12	82425000	82580000	chr12_021	155000
chr12	83595000	83605000	chr12_022	10000
chr12	83610000	83615000	chr12_023	5000
chr12	83635000	83640000	chr12_024	5000
chr12	84510000	84515000	chr12_025	5000
chr12	84525000	86365000	chr12_026	1840000
chr12	86670000	87025000	chr12_027	355000
chr12	87345000	87830000	chr12_028	485000
chr12	88060000	88140000	chr12_029	80000
chr12	88145000	88215000	chr12_030	70000
chr12	88410000	90485000	chr12_031	2075000
chr12	90490000	91695000	chr12_032	1205000
chr12	91720000	91755000	chr12_033	35000
chr12	91945000	91960000	chr12_034	15000
chr12	92870000	92995000	chr12_035	125000
chr12	94625000	94690000	chr12_036	65000
chr12	94820000	94835000	chr12_037	15000
chr12	94850000	94905000	chr12_038	55000
chr12	94915000	95140000	chr12_039	225000
chr12	95350000	95355000	chr12_040	5000
chr12	96150000	96160000	chr12_041	10000
chr12	96170000	97190000	chr12_042	1020000
chr12	99050000	99055000	chr12_043	5000
chr12	99490000	99540000	chr12_044	50000
chr12	99710000	100080000	chr12_045	370000
chr12	101385000	102030000	chr12_046	645000
chr14	48065000	48070000	chr14_001	5000
chr14	77735000	77740000	chr14_002	5000
chrX	9840000	9845000	chrX_001	5000
chrX	15670000	16310000	chrX_002	640000
chrX	16550000	16650000	chrX_003	100000
chrX	16655000	16690000	chrX_004	35000
chrX	17755000	17760000	chrX_005	5000
chrX	17840000	18080000	chrX_006	240000
chrX	33700000	33740000	chrX_007	40000
chrX	34345000	34350000	chrX_008	5000
chrX	44140000	44145000	chrX_009	5000

## Sheet: 778_CN
Chromosome	Start	End	CGR name	Copy number
chr1	170845000	170850000	chr1_001	1.06067
chr1	170855000	170860000	chr1_001	14.1787
chr1	170860000	170865000	chr1_001	13.0461
chr1	170870000	170875000	chr1_001	12.4169
chr1	170875000	170880000	chr1_001	1.75618
chr1	170850000	170855000	chr1_001	13.927
chr1	170865000	170870000	chr1_001	12.8888
chr1	171050000	171055000	chr1_002	16.673
chr1	171055000	171060000	chr1_002	14.7494
chr1	171060000	171065000	chr1_002	14.6382
chr1	171070000	171075000	chr1_002	15.3989
chr1	171075000	171080000	chr1_002	15.7854
chr1	171085000	171090000	chr1_002	16.6157
chr1	171090000	171095000	chr1_002	15.4809
chr1	171100000	171105000	chr1_002	17.3191
chr1	171105000	171110000	chr1_002	16.7191
chr1	171065000	171070000	chr1_002	10.1045
chr1	171080000	171085000	chr1_002	16.0708
chr1	171095000	171100000	chr1_002	16.482
chr1	171045000	171050000	chr1_002	20.4697
chr1	171170000	171175000	chr1_003	2.72697
chr1	171175000	171180000	chr1_003	13.3393
chr1	171185000	171190000	chr1_003	13.2303
chr1	171190000	171195000	chr1_003	12.7629
chr1	171200000	171205000	chr1_003	13.4966
chr1	171205000	171210000	chr1_003	12.6843
chr1	171215000	171220000	chr1_003	13.7146
chr1	171220000	171225000	chr1_003	4.36854
chr1	171195000	171200000	chr1_003	13.7022
chr1	171210000	171215000	chr1_003	13.9966
chr1	171180000	171185000	chr1_003	13.1034
chr1	171410000	171415000	chr1_004	6.63034
chr1	171415000	171420000	chr1_004	11.4753
chr1	171420000	171425000	chr1_004	11.1843
chr1	171430000	171435000	chr1_004	5.22697
chr1	171425000	171430000	chr1_004	11.8292
chr1	171610000	171615000	chr1_005	5.54382
chr1	171615000	171620000	chr1_005	13.2955
chr1	171620000	171625000	chr1_005	11.136
chr1	171690000	171695000	chr1_006	12.3517
chr1	171695000	171700000	chr1_006	14.5551
chr1	171705000	171710000	chr1_006	14.6742
chr1	171710000	171715000	chr1_006	13.418
chr1	171715000	171720000	chr1_006	14.6067
chr1	171725000	171730000	chr1_006	14.8596
chr1	171730000	171735000	chr1_006	14.1742
chr1	171740000	171745000	chr1_006	14.7674
chr1	171745000	171750000	chr1_006	14.509
chr1	171755000	171760000	chr1_006	14.764
chr1	171760000	171765000	chr1_006	15.8854
chr1	171770000	171775000	chr1_006	15.3258
chr1	171775000	171780000	chr1_006	14.5067
chr1	171780000	171785000	chr1_006	14.5517
chr1	171790000	171795000	chr1_006	15.8449
chr1	171795000	171800000	chr1_006	15.0348
chr1	171805000	171810000	chr1_006	29.6708
chr1	171810000	171815000	chr1_006	18.2461
chr1	171820000	171825000	chr1_006	14.6674
chr1	171825000	171830000	chr1_006	15.6326
chr1	171830000	171835000	chr1_006	15.0427
chr1	171840000	171845000	chr1_006	15.6989
chr1	171845000	171850000	chr1_006	14.2697
chr1	171855000	171860000	chr1_006	15.1169
chr1	171860000	171865000	chr1_006	12.7225
chr1	171870000	171875000	chr1_006	14.036
chr1	171875000	171880000	chr1_006	14.5382
chr1	171885000	171890000	chr1_006	15.2551
chr1	171890000	171895000	chr1_006	13.8461
chr1	171895000	171900000	chr1_006	14.173
chr1	171905000	171910000	chr1_006	14.8663
chr1	171910000	171915000	chr1_006	13.4472
chr1	171920000	171925000	chr1_006	15.0955
chr1	171925000	171930000	chr1_006	13.436
chr1	171935000	171940000	chr1_006	14.7326
chr1	171940000	171945000	chr1_006	14.7494
chr1	171945000	171950000	chr1_006	14.2787
chr1	171955000	171960000	chr1_006	14.7247
chr1	171960000	171965000	chr1_006	14.0382
chr1	171970000	171975000	chr1_006	14.4562
chr1	171975000	171980000	chr1_006	14.3034
chr1	171985000	171990000	chr1_006	13.0888
chr1	171990000	171995000	chr1_006	13.118
chr1	172000000	172005000	chr1_006	14.8258
chr1	172005000	172010000	chr1_006	13.0213
chr1	172010000	172015000	chr1_006	14.8708
chr1	172020000	172025000	chr1_006	14.0348
chr1	172025000	172030000	chr1_006	4.89663
chr1	172035000	172040000	chr1_006	14.5494
chr1	172040000	172045000	chr1_006	13.5764
chr1	172050000	172055000	chr1_006	14.7404
chr1	172055000	172060000	chr1_006	15.2461
chr1	172065000	172070000	chr1_006	14.3213
chr1	172070000	172075000	chr1_006	14.3809
chr1	172075000	172080000	chr1_006	13.8135
chr1	172085000	172090000	chr1_006	14.3303
chr1	172090000	172095000	chr1_006	14.4798
chr1	172100000	172105000	chr1_006	15.1551
chr1	172105000	172110000	chr1_006	14.9584
chr1	172115000	172120000	chr1_006	14.7326
chr1	172120000	172125000	chr1_006	14.8831
chr1	172125000	172130000	chr1_006	15.1427
chr1	172135000	172140000	chr1_006	13.918
chr1	172140000	172145000	chr1_006	15.2045
chr1	172150000	172155000	chr1_006	14.3382
chr1	172155000	172160000	chr1_006	14.4202
chr1	172165000	172170000	chr1_006	15.3843
chr1	172170000	172175000	chr1_006	14.4292
chr1	172180000	172185000	chr1_006	14.9787
chr1	172185000	172190000	chr1_006	14.136
chr1	172190000	172195000	chr1_006	14.3449
chr1	172200000	172205000	chr1_006	9.26292
chr1	172205000	172210000	chr1_006	13.9865
chr1	172215000	172220000	chr1_006	27.1584
chr1	172220000	172225000	chr1_006	29.5034
chr1	172230000	172235000	chr1_006	28.1011
chr1	172235000	172240000	chr1_006	28.5191
chr1	172245000	172250000	chr1_006	29.0955
chr1	172250000	172255000	chr1_006	28.8831
chr1	172255000	172260000	chr1_006	27.0056
chr1	172265000	172270000	chr1_006	28.9876
chr1	172270000	172275000	chr1_006	24.9944
chr1	172280000	172285000	chr1_006	22.764
chr1	172285000	172290000	chr1_006	14.6135
chr1	172295000	172300000	chr1_006	29.8697
chr1	172300000	172305000	chr1_006	29.2899
chr1	172305000	172310000	chr1_006	28.0629
chr1	172315000	172320000	chr1_006	28.8292
chr1	172320000	172325000	chr1_006	28.2213
chr1	172330000	172335000	chr1_006	28.6854
chr1	172335000	172340000	chr1_006	30.2494
chr1	172345000	172350000	chr1_006	29.4506
chr1	172350000	172355000	chr1_006	29.7
chr1	172360000	172365000	chr1_006	28.3899
chr1	172365000	172370000	chr1_006	30.0708
chr1	172370000	172375000	chr1_006	38.1517
chr1	172380000	172385000	chr1_006	42.4034
chr1	172385000	172390000	chr1_006	44.9022
chr1	172395000	172400000	chr1_006	30.8663
chr1	172400000	172405000	chr1_006	25.2539
chr1	172410000	172415000	chr1_006	28.2157
chr1	172415000	172420000	chr1_006	30.7494
chr1	172420000	172425000	chr1_006	32.3573
chr1	172430000	172435000	chr1_006	30.9247
chr1	172435000	172440000	chr1_006	30.1955
chr1	172445000	172450000	chr1_006	30.7382
chr1	172450000	172455000	chr1_006	31.3135
chr1	172460000	172465000	chr1_006	32.3955
chr1	172465000	172470000	chr1_006	29.7517
chr1	172475000	172480000	chr1_006	30.6899
chr1	172480000	172485000	chr1_006	32.8674
chr1	172485000	172490000	chr1_006	29.1674
chr1	172495000	172500000	chr1_006	29.3213
chr1	172500000	172505000	chr1_006	27.3315
chr1	172510000	172515000	chr1_006	31.1674
chr1	172515000	172520000	chr1_006	30.2899
chr1	172525000	172530000	chr1_006	32.7966
chr1	172530000	172535000	chr1_006	29.6315
chr1	172540000	172545000	chr1_006	20.664
chr1	172545000	172550000	chr1_006	34.0989
chr1	172550000	172555000	chr1_006	29.7719
chr1	172560000	172565000	chr1_006	11.1124
chr1	172565000	172570000	chr1_006	22.1034
chr1	172575000	172580000	chr1_006	27.882
chr1	172580000	172585000	chr1_006	26.3292
chr1	172590000	172595000	chr1_006	19.1775
chr1	172595000	172600000	chr1_006	27.2494
chr1	172600000	172605000	chr1_006	25.7573
chr1	172610000	172615000	chr1_006	26.8067
chr1	172615000	172620000	chr1_006	27.3607
chr1	172625000	172630000	chr1_006	24.5011
chr1	172630000	172635000	chr1_006	28.2494
chr1	172640000	172645000	chr1_006	27.8326
chr1	172645000	172650000	chr1_006	25.4843
chr1	172655000	172660000	chr1_006	26.8067
chr1	172660000	172665000	chr1_006	23.0348
chr1	172665000	172670000	chr1_006	27.427
chr1	172675000	172680000	chr1_006	26.473
chr1	172680000	172685000	chr1_006	28.3371
chr1	172690000	172695000	chr1_006	26.2528
chr1	172695000	172700000	chr1_006	26.7337
chr1	172705000	172710000	chr1_006	27.0753
chr1	172710000	172715000	chr1_006	27.1337
chr1	172715000	172720000	chr1_006	26.2213
chr1	172725000	172730000	chr1_006	27.8921
chr1	172730000	172735000	chr1_006	27.7843
chr1	172740000	172745000	chr1_006	28.3404
chr1	172745000	172750000	chr1_006	27.5753
chr1	172755000	172760000	chr1_006	26.3101
chr1	172760000	172765000	chr1_006	25.8551
chr1	172770000	172775000	chr1_006	24.3551
chr1	172775000	172780000	chr1_006	18.0371
chr1	172780000	172785000	chr1_006	12.4753
chr1	172790000	172795000	chr1_006	12.691
chr1	172795000	172800000	chr1_006	12.536
chr1	172805000	172810000	chr1_006	11.6
chr1	172810000	172815000	chr1_006	11.8888
chr1	172820000	172825000	chr1_006	11.6674
chr1	172825000	172830000	chr1_006	11.8146
chr1	171685000	171690000	chr1_006	5.45506
chr1	171720000	171725000	chr1_006	14.1146
chr1	171735000	171740000	chr1_006	14.3708
chr1	171750000	171755000	chr1_006	14.6202
chr1	171765000	171770000	chr1_006	15.2944
chr1	171785000	171790000	chr1_006	14.9517
chr1	171800000	171805000	chr1_006	15.3854
chr1	171815000	171820000	chr1_006	23.3584
chr1	171850000	171855000	chr1_006	13.5618
chr1	171865000	171870000	chr1_006	13.6315
chr1	171880000	171885000	chr1_006	13.8213
chr1	171900000	171905000	chr1_006	13.8213
chr1	171915000	171920000	chr1_006	14.7281
chr1	171930000	171935000	chr1_006	14.4382
chr1	171950000	171955000	chr1_006	14.5438
chr1	171980000	171985000	chr1_006	14.6169
chr1	171995000	172000000	chr1_006	12.5753
chr1	172015000	172020000	chr1_006	15.0831
chr1	172030000	172035000	chr1_006	12.5764
chr1	172045000	172050000	chr1_006	13.2225
chr1	172060000	172065000	chr1_006	15.7461
chr1	172080000	172085000	chr1_006	14.8787
chr1	172110000	172115000	chr1_006	13.4742
chr1	172130000	172135000	chr1_006	13.4573
chr1	172145000	172150000	chr1_006	14.6225
chr1	172160000	172165000	chr1_006	11.2607
chr1	172175000	172180000	chr1_006	14.9506
chr1	172195000	172200000	chr1_006	14.318
chr1	172210000	172215000	chr1_006	12.4742
chr1	172240000	172245000	chr1_006	30.2517
chr1	172260000	172265000	chr1_006	29.4629
chr1	172275000	172280000	chr1_006	26.9056
chr1	172290000	172295000	chr1_006	28.1787
chr1	172310000	172315000	chr1_006	29.764
chr1	172325000	172330000	chr1_006	28.9247
chr1	172340000	172345000	chr1_006	27.4124
chr1	172375000	172380000	chr1_006	47.0461
chr1	172390000	172395000	chr1_006	34.1045
chr1	172405000	172410000	chr1_006	27.2303
chr1	172425000	172430000	chr1_006	31.1607
chr1	172440000	172445000	chr1_006	32.8562
chr1	172455000	172460000	chr1_006	31.6551
chr1	172470000	172475000	chr1_006	32.8674
chr1	172505000	172510000	chr1_006	33.0674
chr1	172520000	172525000	chr1_006	31.491
chr1	172535000	172540000	chr1_006	18.5865
chr1	172555000	172560000	chr1_006	31.2697
chr1	172570000	172575000	chr1_006	27.5101
chr1	172585000	172590000	chr1_006	17.6247
chr1	172605000	172610000	chr1_006	27.5742
chr1	172635000	172640000	chr1_006	27.1562
chr1	172650000	172655000	chr1_006	26.6135
chr1	172670000	172675000	chr1_006	28
chr1	172685000	172690000	chr1_006	26.6315
chr1	172700000	172705000	chr1_006	26.0921
chr1	172720000	172725000	chr1_006	26.8798
chr1	172735000	172740000	chr1_006	27.3404
chr1	172765000	172770000	chr1_006	24.8719
chr1	172785000	172790000	chr1_006	12.2989
chr1	172800000	172805000	chr1_006	13.1933
chr1	172815000	172820000	chr1_006	12.9034
chr1	172830000	172835000	chr1_006	8.66067
chr1	171700000	171705000	chr1_006	14.1112
chr1	171835000	171840000	chr1_006	15.027
chr1	172095000	172100000	chr1_006	13.9404
chr1	172225000	172230000	chr1_006	31.6022
chr1	172355000	172360000	chr1_006	27.2888
chr1	172490000	172495000	chr1_006	30.0258
chr1	172620000	172625000	chr1_006	27.318
chr1	172750000	172755000	chr1_006	28.1056
chr1	171965000	171970000	chr1_006	14.3517
chr1	178245000	178250000	chr1_007	1.01011
chr1	178250000	178255000	chr1_007	13.3225
chr1	178260000	178265000	chr1_007	13.9674
chr1	178265000	178270000	chr1_007	17.1573
chr1	178275000	178280000	chr1_007	16.136
chr1	178280000	178285000	chr1_007	14.7494
chr1	178285000	178290000	chr1_007	4.42921
chr1	178295000	178300000	chr1_007	9.48427
chr1	178270000	178275000	chr1_007	18.2753
chr1	178290000	178295000	chr1_007	16.8461
chr1	178255000	178260000	chr1_007	13.0079
chr1	181830000	181835000	chr1_008	2.43933
chr1	181835000	181840000	chr1_008	14.1854
chr1	181840000	181845000	chr1_008	31.1506
chr1	181850000	181855000	chr1_008	10.5955
chr1	181855000	181860000	chr1_008	8.75056
chr1	181865000	181870000	chr1_008	11.8607
chr1	181870000	181875000	chr1_008	11.5202
chr1	181880000	181885000	chr1_008	11.873
chr1	181885000	181890000	chr1_008	11.518
chr1	181890000	181895000	chr1_008	11.0663
chr1	181900000	181905000	chr1_008	12.0157
chr1	181905000	181910000	chr1_008	11.1213
chr1	181915000	181920000	chr1_008	11.7921
chr1	181920000	181925000	chr1_008	10.4292
chr1	181930000	181935000	chr1_008	11.4708
chr1	181935000	181940000	chr1_008	11.1831
chr1	181845000	181850000	chr1_008	32.4034
chr1	181860000	181865000	chr1_008	12.336
chr1	181875000	181880000	chr1_008	12.282
chr1	181895000	181900000	chr1_008	12.7562
chr1	181910000	181915000	chr1_008	11.7472
chr1	181940000	181945000	chr1_008	8.6427
chr1	181925000	181930000	chr1_008	11.2865
chr1	182310000	182315000	chr1_009	3.73483
chr1	182315000	182320000	chr1_009	41.7629
chr1	183830000	183835000	chr1_010	22.5607
chr1	183835000	183840000	chr1_010	38.0719
chr1	183845000	183850000	chr1_010	32.3708
chr1	183850000	183855000	chr1_010	47.6461
chr1	183855000	183860000	chr1_010	41.5921
chr1	183840000	183845000	chr1_010	46.2416
chr1	183860000	183865000	chr1_010	24.836
chr1	184095000	184100000	chr1_011	1.06966
chr1	184100000	184105000	chr1_011	9.27753
chr1	184110000	184115000	chr1_011	17.8326
chr1	184115000	184120000	chr1_011	4.90899
chr1	184105000	184110000	chr1_011	16.336
chr1	185370000	185375000	chr1_012	3.83146
chr1	185375000	185380000	chr1_012	4.06854
chr1	185365000	185370000	chr1_012	3.56629
chr1	185380000	185385000	chr1_012	3.96742
chr1	185680000	185685000	chr1_013	4.6618
chr1	185685000	185690000	chr1_013	13.3045
chr1	185690000	185695000	chr1_013	14.3674
chr1	185700000	185705000	chr1_013	12.6719
chr1	185705000	185710000	chr1_013	13.591
chr1	185695000	185700000	chr1_013	13.1191
chr1	185710000	185715000	chr1_013	11.3427
chr1	185750000	185755000	chr1_014	24.8135
chr1	185755000	185760000	chr1_014	31.1584
chr1	185765000	185770000	chr1_014	26.9416
chr1	185770000	185775000	chr1_014	30.0135
chr1	185780000	185785000	chr1_014	40.3921
chr1	185785000	185790000	chr1_014	40.6888
chr1	185795000	185800000	chr1_014	39.5742
chr1	185800000	185805000	chr1_014	41.1202
chr1	185805000	185810000	chr1_014	40.8483
chr1	185815000	185820000	chr1_014	26.0528
chr1	185820000	185825000	chr1_014	26.8169
chr1	185830000	185835000	chr1_014	27.6719
chr1	185835000	185840000	chr1_014	24.4382
chr1	185845000	185850000	chr1_014	26.6955
chr1	185850000	185855000	chr1_014	26.4483
chr1	185855000	185860000	chr1_014	10.3753
chr1	185865000	185870000	chr1_014	26.2663
chr1	185870000	185875000	chr1_014	26.1124
chr1	185880000	185885000	chr1_014	25.9854
chr1	185885000	185890000	chr1_014	22.1371
chr1	185895000	185900000	chr1_014	44.3787
chr1	185900000	185905000	chr1_014	42.0449
chr1	185910000	185915000	chr1_014	41.609
chr1	185915000	185920000	chr1_014	29.3764
chr1	185920000	185925000	chr1_014	35.8146
chr1	185930000	185935000	chr1_014	56.5775
chr1	185935000	185940000	chr1_014	40.0562
chr1	185945000	185950000	chr1_014	40.1236
chr1	185950000	185955000	chr1_014	40.8236
chr1	185960000	185965000	chr1_014	27.3303
chr1	185965000	185970000	chr1_014	26.173
chr1	185975000	185980000	chr1_014	25.2809
chr1	185980000	185985000	chr1_014	29.1618
chr1	185985000	185990000	chr1_014	39.7843
chr1	185995000	186000000	chr1_014	51.6202
chr1	186000000	186005000	chr1_014	53.7517
chr1	186010000	186015000	chr1_014	41.1708
chr1	186015000	186020000	chr1_014	40.6596
chr1	186025000	186030000	chr1_014	45.009
chr1	186030000	186035000	chr1_014	32.5708
chr1	186035000	186040000	chr1_014	31.0888
chr1	186045000	186050000	chr1_014	31.6798
chr1	186050000	186055000	chr1_014	30.9921
chr1	186060000	186065000	chr1_014	33.9146
chr1	186065000	186070000	chr1_014	33.6551
chr1	186075000	186080000	chr1_014	32.9506
chr1	186080000	186085000	chr1_014	30.591
chr1	186090000	186095000	chr1_014	15.1337
chr1	186095000	186100000	chr1_014	15.2056
chr1	186100000	186105000	chr1_014	15.9888
chr1	186110000	186115000	chr1_014	27.7169
chr1	186115000	186120000	chr1_014	28.1708
chr1	186125000	186130000	chr1_014	16.2213
chr1	186130000	186135000	chr1_014	20.6079
chr1	186140000	186145000	chr1_014	27.8326
chr1	186145000	186150000	chr1_014	27.5584
chr1	186150000	186155000	chr1_014	27.8236
chr1	186160000	186165000	chr1_014	27.4944
chr1	186165000	186170000	chr1_014	26.1112
chr1	186175000	186180000	chr1_014	27.7798
chr1	186180000	186185000	chr1_014	26.9629
chr1	186190000	186195000	chr1_014	26.9888
chr1	186195000	186200000	chr1_014	28.9652
chr1	186205000	186210000	chr1_014	27.191
chr1	186210000	186215000	chr1_014	26.5483
chr1	186215000	186220000	chr1_014	26.8539
chr1	186225000	186230000	chr1_014	18.6124
chr1	186230000	186235000	chr1_014	22.8101
chr1	186240000	186245000	chr1_014	29.7764
chr1	186245000	186250000	chr1_014	28.9551
chr1	186255000	186260000	chr1_014	16.1348
chr1	186260000	186265000	chr1_014	10.2101
chr1	185760000	185765000	chr1_014	28.8292
chr1	185775000	185780000	chr1_014	28.5921
chr1	185790000	185795000	chr1_014	42.2775
chr1	185810000	185815000	chr1_014	26.8663
chr1	185825000	185830000	chr1_014	23.436
chr1	185840000	185845000	chr1_014	25.8697
chr1	185875000	185880000	chr1_014	26.2292
chr1	185890000	185895000	chr1_014	34.9989
chr1	185905000	185910000	chr1_014	40.3685
chr1	185925000	185930000	chr1_014	56.327
chr1	185940000	185945000	chr1_014	42.9258
chr1	185955000	185960000	chr1_014	25.9101
chr1	185970000	185975000	chr1_014	27.2865
chr1	186005000	186010000	chr1_014	42.6865
chr1	186020000	186025000	chr1_014	47.4202
chr1	186040000	186045000	chr1_014	34.1281
chr1	186055000	186060000	chr1_014	33.6831
chr1	186070000	186075000	chr1_014	34.5933
chr1	186085000	186090000	chr1_014	30.4562
chr1	186105000	186110000	chr1_014	25.5798
chr1	186135000	186140000	chr1_014	27.1449
chr1	186155000	186160000	chr1_014	27.118
chr1	186170000	186175000	chr1_014	27.7798
chr1	186185000	186190000	chr1_014	21.409
chr1	186200000	186205000	chr1_014	28.318
chr1	186220000	186225000	chr1_014	26.2146
chr1	186235000	186240000	chr1_014	28.8584
chr1	186265000	186270000	chr1_014	7.92921
chr1	185860000	185865000	chr1_014	18.5371
chr1	185990000	185995000	chr1_014	40.5112
chr1	186120000	186125000	chr1_014	27.9292
chr1	186250000	186255000	chr1_014	26.4798
chr1	186280000	186285000	chr1_015	11.6764
chr1	186290000	186295000	chr1_015	13.3337
chr1	186295000	186300000	chr1_015	12.6045
chr1	186305000	186310000	chr1_015	12.7
chr1	186310000	186315000	chr1_015	12.6337
chr1	186320000	186325000	chr1_015	12.3562
chr1	186325000	186330000	chr1_015	12.9888
chr1	186330000	186335000	chr1_015	13.5787
chr1	186340000	186345000	chr1_015	11.6101
chr1	186345000	186350000	chr1_015	12.6944
chr1	186355000	186360000	chr1_015	13.409
chr1	186360000	186365000	chr1_015	16.2562
chr1	186370000	186375000	chr1_015	23.8472
chr1	186375000	186380000	chr1_015	25.2596
chr1	186385000	186390000	chr1_015	22.6191
chr1	186390000	186395000	chr1_015	24.1697
chr1	186395000	186400000	chr1_015	30.0438
chr1	186405000	186410000	chr1_015	39.6258
chr1	186410000	186415000	chr1_015	20.536
chr1	186420000	186425000	chr1_015	11.5101
chr1	186425000	186430000	chr1_015	9.68202
chr1	186435000	186440000	chr1_015	12.5202
chr1	186440000	186445000	chr1_015	12.3562
chr1	186450000	186455000	chr1_015	11.9764
chr1	186455000	186460000	chr1_015	13.2438
chr1	186460000	186465000	chr1_015	11.8157
chr1	186470000	186475000	chr1_015	16.6034
chr1	186475000	186480000	chr1_015	14.8562
chr1	186485000	186490000	chr1_015	16.5596
chr1	186490000	186495000	chr1_015	16.1607
chr1	186500000	186505000	chr1_015	16.1124
chr1	186505000	186510000	chr1_015	16.2157
chr1	186510000	186515000	chr1_015	14.2933
chr1	186520000	186525000	chr1_015	16.0989
chr1	186525000	186530000	chr1_015	16.1034
chr1	186535000	186540000	chr1_015	16.8517
chr1	186540000	186545000	chr1_015	15.4809
chr1	186550000	186555000	chr1_015	16.0719
chr1	186555000	186560000	chr1_015	12.409
chr1	186565000	186570000	chr1_015	12.9393
chr1	186570000	186575000	chr1_015	12.1079
chr1	186575000	186580000	chr1_015	12.0528
chr1	186585000	186590000	chr1_015	11.5742
chr1	186590000	186595000	chr1_015	11.3022
chr1	186600000	186605000	chr1_015	25.1809
chr1	186605000	186610000	chr1_015	14.5135
chr1	186615000	186620000	chr1_015	23.6191
chr1	186620000	186625000	chr1_015	23.7933
chr1	186625000	186630000	chr1_015	24.8876
chr1	186635000	186640000	chr1_015	22.5382
chr1	186640000	186645000	chr1_015	12.9494
chr1	186650000	186655000	chr1_015	12.7663
chr1	186655000	186660000	chr1_015	13.2809
chr1	186665000	186670000	chr1_015	3.34607
chr1	186670000	186675000	chr1_015	4.94831
chr1	186680000	186685000	chr1_015	13.3719
chr1	186685000	186690000	chr1_015	13.1494
chr1	186690000	186695000	chr1_015	13.1708
chr1	186700000	186705000	chr1_015	14.518
chr1	186285000	186290000	chr1_015	12.8573
chr1	186300000	186305000	chr1_015	13.3562
chr1	186315000	186320000	chr1_015	12.4921
chr1	186335000	186340000	chr1_015	12.8865
chr1	186350000	186355000	chr1_015	11.9034
chr1	186365000	186370000	chr1_015	23.3697
chr1	186400000	186405000	chr1_015	38.9135
chr1	186415000	186420000	chr1_015	11.7607
chr1	186430000	186435000	chr1_015	11.4618
chr1	186445000	186450000	chr1_015	12.3247
chr1	186465000	186470000	chr1_015	12.1045
chr1	186480000	186485000	chr1_015	15.4798
chr1	186495000	186500000	chr1_015	16.3966
chr1	186530000	186535000	chr1_015	15.6944
chr1	186545000	186550000	chr1_015	16.4079
chr1	186560000	186565000	chr1_015	11.9348
chr1	186580000	186585000	chr1_015	12.1517
chr1	186595000	186600000	chr1_015	20.2169
chr1	186610000	186615000	chr1_015	16.9966
chr1	186630000	186635000	chr1_015	23.1831
chr1	186660000	186665000	chr1_015	12.373
chr1	186675000	186680000	chr1_015	12.2303
chr1	186695000	186700000	chr1_015	12.2135
chr1	186380000	186385000	chr1_015	24.3472
chr1	186515000	186520000	chr1_015	14.4169
chr1	186645000	186650000	chr1_015	12.2449
chr1	188015000	188020000	chr1_016	11.782
chr1	188025000	188030000	chr1_016	14.5708
chr1	188030000	188035000	chr1_016	14.5966
chr1	188040000	188045000	chr1_016	14.1011
chr1	188045000	188050000	chr1_016	13.7708
chr1	188050000	188055000	chr1_016	13.4449
chr1	188020000	188025000	chr1_016	14.9146
chr1	188035000	188040000	chr1_016	14.7472
chr1	188190000	188195000	chr1_017	2.87753
chr1	188195000	188200000	chr1_017	4.01685
chr1	188205000	188210000	chr1_017	3.83258
chr1	188210000	188215000	chr1_017	3.88539
chr1	188220000	188225000	chr1_017	4.14831
chr1	188225000	188230000	chr1_017	3.98876
chr1	188230000	188235000	chr1_017	3.58876
chr1	188240000	188245000	chr1_017	3.72247
chr1	188245000	188250000	chr1_017	3.96292
chr1	188255000	188260000	chr1_017	3.9427
chr1	188260000	188265000	chr1_017	3.94831
chr1	188270000	188275000	chr1_017	23.8427
chr1	188275000	188280000	chr1_017	38.3876
chr1	188285000	188290000	chr1_017	40.3034
chr1	188290000	188295000	chr1_017	40.5787
chr1	188295000	188300000	chr1_017	41.2225
chr1	188305000	188310000	chr1_017	39.2551
chr1	188310000	188315000	chr1_017	37.0169
chr1	188320000	188325000	chr1_017	35.2427
chr1	188325000	188330000	chr1_017	39.1506
chr1	188335000	188340000	chr1_017	46.2067
chr1	188340000	188345000	chr1_017	37.1562
chr1	188345000	188350000	chr1_017	32.0843
chr1	188355000	188360000	chr1_017	31.0438
chr1	188360000	188365000	chr1_017	26.2281
chr1	188370000	188375000	chr1_017	4.06629
chr1	188375000	188380000	chr1_017	22.764
chr1	188385000	188390000	chr1_017	31.5888
chr1	188390000	188395000	chr1_017	23.9989
chr1	188400000	188405000	chr1_017	26.5528
chr1	188405000	188410000	chr1_017	22.9461
chr1	188410000	188415000	chr1_017	14.9764
chr1	188420000	188425000	chr1_017	16.027
chr1	188425000	188430000	chr1_017	14.9101
chr1	188435000	188440000	chr1_017	15.927
chr1	188440000	188445000	chr1_017	13.3393
chr1	188450000	188455000	chr1_017	4.2
chr1	188455000	188460000	chr1_017	3.81124
chr1	188460000	188465000	chr1_017	4.27753
chr1	188470000	188475000	chr1_017	4.09663
chr1	188475000	188480000	chr1_017	4.03933
chr1	188485000	188490000	chr1_017	14.4461
chr1	188490000	188495000	chr1_017	17.0258
chr1	188500000	188505000	chr1_017	17.4629
chr1	188505000	188510000	chr1_017	17.9404
chr1	188515000	188520000	chr1_017	16.3281
chr1	188520000	188525000	chr1_017	17.1213
chr1	188525000	188530000	chr1_017	10.1135
chr1	188535000	188540000	chr1_017	15.1135
chr1	188540000	188545000	chr1_017	28.3135
chr1	188550000	188555000	chr1_017	30.1607
chr1	188555000	188560000	chr1_017	30.5697
chr1	188565000	188570000	chr1_017	32.1652
chr1	188570000	188575000	chr1_017	31.882
chr1	188580000	188585000	chr1_017	30.2584
chr1	188585000	188590000	chr1_017	31.9876
chr1	188590000	188595000	chr1_017	29.1663
chr1	188600000	188605000	chr1_017	19.8697
chr1	188605000	188610000	chr1_017	14.5045
chr1	188615000	188620000	chr1_017	32.3045
chr1	188620000	188625000	chr1_017	33.3326
chr1	188630000	188635000	chr1_017	18.0843
chr1	188635000	188640000	chr1_017	16.2944
chr1	188640000	188645000	chr1_017	31.409
chr1	188650000	188655000	chr1_017	32.5079
chr1	188655000	188660000	chr1_017	30.7382
chr1	188665000	188670000	chr1_017	30.682
chr1	188670000	188675000	chr1_017	30.1056
chr1	188680000	188685000	chr1_017	33.6191
chr1	188685000	188690000	chr1_017	33.1674
chr1	188695000	188700000	chr1_017	52.1966
chr1	188700000	188705000	chr1_017	44.8045
chr1	188705000	188710000	chr1_017	51.118
chr1	188715000	188720000	chr1_017	46.6056
chr1	188720000	188725000	chr1_017	22.7371
chr1	188730000	188735000	chr1_017	52.1225
chr1	188735000	188740000	chr1_017	46.7169
chr1	188745000	188750000	chr1_017	35.1315
chr1	188750000	188755000	chr1_017	38.218
chr1	188755000	188760000	chr1_017	36.5404
chr1	188765000	188770000	chr1_017	33.4685
chr1	188770000	188775000	chr1_017	32.8921
chr1	188780000	188785000	chr1_017	34.7281
chr1	188785000	188790000	chr1_017	67.1966
chr1	188795000	188800000	chr1_017	74.3
chr1	188800000	188805000	chr1_017	72.7371
chr1	188810000	188815000	chr1_017	73.4843
chr1	188815000	188820000	chr1_017	76.1494
chr1	188820000	188825000	chr1_017	96.4393
chr1	188830000	188835000	chr1_017	76.2719
chr1	188835000	188840000	chr1_017	74.2708
chr1	188845000	188850000	chr1_017	52.3382
chr1	188850000	188855000	chr1_017	52.7787
chr1	188860000	188865000	chr1_017	53.8258
chr1	188865000	188870000	chr1_017	44.0787
chr1	188875000	188880000	chr1_017	63.9202
chr1	188880000	188885000	chr1_017	65.0798
chr1	188885000	188890000	chr1_017	66.9921
chr1	188895000	188900000	chr1_017	64.5427
chr1	188900000	188905000	chr1_017	64.6921
chr1	188910000	188915000	chr1_017	60.282
chr1	188915000	188920000	chr1_017	61.7124
chr1	188925000	188930000	chr1_017	56.4854
chr1	188930000	188935000	chr1_017	53.2169
chr1	188935000	188940000	chr1_017	43.2112
chr1	188945000	188950000	chr1_017	39.1506
chr1	188950000	188955000	chr1_017	40.891
chr1	188960000	188965000	chr1_017	44.3202
chr1	188965000	188970000	chr1_017	37.2517
chr1	188975000	188980000	chr1_017	55.909
chr1	188980000	188985000	chr1_017	53.1865
chr1	188990000	188995000	chr1_017	35.3629
chr1	188995000	189000000	chr1_017	44.9685
chr1	189000000	189005000	chr1_017	40.8124
chr1	189010000	189015000	chr1_017	50.7371
chr1	189015000	189020000	chr1_017	47.3629
chr1	189025000	189030000	chr1_017	44.9888
chr1	189030000	189035000	chr1_017	44.5607
chr1	189040000	189045000	chr1_017	44.7416
chr1	189045000	189050000	chr1_017	41.6011
chr1	189055000	189060000	chr1_017	49.0551
chr1	189060000	189065000	chr1_017	39.4843
chr1	189065000	189070000	chr1_017	46.3798
chr1	189075000	189080000	chr1_017	45.064
chr1	189080000	189085000	chr1_017	50.3494
chr1	189090000	189095000	chr1_017	48.0876
chr1	189095000	189100000	chr1_017	17.2933
chr1	188200000	188205000	chr1_017	4.28427
chr1	188235000	188240000	chr1_017	3.92809
chr1	188250000	188255000	chr1_017	4.18652
chr1	188265000	188270000	chr1_017	4.04831
chr1	188280000	188285000	chr1_017	43.5652
chr1	188300000	188305000	chr1_017	42.4292
chr1	188315000	188320000	chr1_017	53.1876
chr1	188330000	188335000	chr1_017	47.2124
chr1	188365000	188370000	chr1_017	25.4393
chr1	188380000	188385000	chr1_017	75.3157
chr1	188395000	188400000	chr1_017	25.9045
chr1	188415000	188420000	chr1_017	13.4292
chr1	188430000	188435000	chr1_017	14.7742
chr1	188445000	188450000	chr1_017	4.07079
chr1	188465000	188470000	chr1_017	3.81236
chr1	188495000	188500000	chr1_017	17.7528
chr1	188510000	188515000	chr1_017	17.1697
chr1	188530000	188535000	chr1_017	17.5022
chr1	188545000	188550000	chr1_017	31.3685
chr1	188560000	188565000	chr1_017	30.2472
chr1	188575000	188580000	chr1_017	29.8506
chr1	188595000	188600000	chr1_017	30.3382
chr1	188625000	188630000	chr1_017	20.5191
chr1	188645000	188650000	chr1_017	33.7596
chr1	188660000	188665000	chr1_017	31.5652
chr1	188675000	188680000	chr1_017	30.3573
chr1	188690000	188695000	chr1_017	48.4933
chr1	188710000	188715000	chr1_017	48.3202
chr1	188725000	188730000	chr1_017	29.4135
chr1	188760000	188765000	chr1_017	36.8022
chr1	188775000	188780000	chr1_017	37.3045
chr1	188790000	188795000	chr1_017	74.4112
chr1	188805000	188810000	chr1_017	71.9607
chr1	188825000	188830000	chr1_017	76.782
chr1	188840000	188845000	chr1_017	58.5809
chr1	188855000	188860000	chr1_017	48.118
chr1	188890000	188895000	chr1_017	68.6978
chr1	188905000	188910000	chr1_017	67.4921
chr1	188920000	188925000	chr1_017	55.4045
chr1	188940000	188945000	chr1_017	35.8809
chr1	188955000	188960000	chr1_017	39.3742
chr1	188970000	188975000	chr1_017	41.3225
chr1	188985000	188990000	chr1_017	47.427
chr1	189020000	189025000	chr1_017	44.7034
chr1	189035000	189040000	chr1_017	43.8213
chr1	189050000	189055000	chr1_017	49.6888
chr1	189070000	189075000	chr1_017	47.9382
chr1	189085000	189090000	chr1_017	44.9618
chr1	188215000	188220000	chr1_017	4.40787
chr1	188350000	188355000	chr1_017	30.2315
chr1	188480000	188485000	chr1_017	5.89888
chr1	188610000	188615000	chr1_017	31.118
chr1	188870000	188875000	chr1_017	60.182
chr1	189005000	189010000	chr1_017	49.2191
chr1	188740000	188745000	chr1_017	41.5236
chr1	189535000	189540000	chr1_018	11.9067
chr1	189540000	189545000	chr1_018	12.7191
chr1	189550000	189555000	chr1_018	12.7652
chr1	189555000	189560000	chr1_018	13.5753
chr1	189565000	189570000	chr1_018	13.8494
chr1	189570000	189575000	chr1_018	12.8067
chr1	189580000	189585000	chr1_018	13.7393
chr1	189585000	189590000	chr1_018	14.6404
chr1	189590000	189595000	chr1_018	14.1079
chr1	189600000	189605000	chr1_018	9.3
chr1	189545000	189550000	chr1_018	14.4944
chr1	189560000	189565000	chr1_018	13.2258
chr1	189575000	189580000	chr1_018	14.4292
chr1	189595000	189600000	chr1_018	14.4944
chr1	190730000	190735000	chr1_019	1.20674
chr1	190735000	190740000	chr1_019	13.309
chr1	190745000	190750000	chr1_019	14.5674
chr1	190750000	190755000	chr1_019	13.227
chr1	190760000	190765000	chr1_019	12.8112
chr1	190765000	190770000	chr1_019	7.09101
chr1	190740000	190745000	chr1_019	14.3191
chr1	190755000	190760000	chr1_019	14.0146
chr1	194790000	194795000	chr1_020	13.3517
chr1	194795000	194800000	chr1_020	12.136
chr1	194800000	194805000	chr1_020	13.4764
chr1	194810000	194815000	chr1_020	25.236
chr1	194815000	194820000	chr1_020	17.6393
chr1	194825000	194830000	chr1_020	10.5191
chr1	194830000	194835000	chr1_020	12.9978
chr1	194840000	194845000	chr1_020	12.6303
chr1	194845000	194850000	chr1_020	12.9944
chr1	194855000	194860000	chr1_020	11.9303
chr1	194860000	194865000	chr1_020	11.9
chr1	194865000	194870000	chr1_020	13.7416
chr1	194875000	194880000	chr1_020	9.24382
chr1	194880000	194885000	chr1_020	11.6697
chr1	194890000	194895000	chr1_020	12.4708
chr1	194895000	194900000	chr1_020	12.8697
chr1	194905000	194910000	chr1_020	12.236
chr1	194910000	194915000	chr1_020	12.9337
chr1	194915000	194920000	chr1_020	12.6427
chr1	194925000	194930000	chr1_020	13.7449
chr1	194930000	194935000	chr1_020	20.0034
chr1	194940000	194945000	chr1_020	21.027
chr1	194945000	194950000	chr1_020	21.227
chr1	194955000	194960000	chr1_020	22.4888
chr1	194960000	194965000	chr1_020	22.2079
chr1	194970000	194975000	chr1_020	22.4157
chr1	194975000	194980000	chr1_020	23.9753
chr1	194980000	194985000	chr1_020	22.9079
chr1	194990000	194995000	chr1_020	11.1944
chr1	194785000	194790000	chr1_020	9.86404
chr1	194805000	194810000	chr1_020	15.6112
chr1	194820000	194825000	chr1_020	13.0685
chr1	194835000	194840000	chr1_020	11.2551
chr1	194850000	194855000	chr1_020	13.6674
chr1	194870000	194875000	chr1_020	12.5697
chr1	194885000	194890000	chr1_020	12.991
chr1	194920000	194925000	chr1_020	12.6618
chr1	194935000	194940000	chr1_020	21.1539
chr1	194950000	194955000	chr1_020	23.273
chr1	194965000	194970000	chr1_020	24.1618
chr1	194985000	194990000	chr1_020	24.8562
chr1	194900000	194905000	chr1_020	12.0798
chr10	3265000	3270000	chr10_001	39.5056
chr10	3270000	3275000	chr10_001	40.091
chr10	3280000	3285000	chr10_001	27.7629
chr10	3285000	3290000	chr10_001	27.8281
chr10	3295000	3300000	chr10_001	14.6742
chr10	3300000	3305000	chr10_001	14.7719
chr10	3310000	3315000	chr10_001	14.582
chr10	3315000	3320000	chr10_001	13.4539
chr10	3320000	3325000	chr10_001	15.1607
chr10	3330000	3335000	chr10_001	13.6382
chr10	3335000	3340000	chr10_001	14.3551
chr10	3345000	3350000	chr10_001	14.636
chr10	3350000	3355000	chr10_001	14.836
chr10	3360000	3365000	chr10_001	11.6416
chr10	3365000	3370000	chr10_001	13.7596
chr10	3370000	3375000	chr10_001	6.96629
chr10	3260000	3265000	chr10_001	5.83933
chr10	3290000	3295000	chr10_001	22.873
chr10	3305000	3310000	chr10_001	14.3404
chr10	3325000	3330000	chr10_001	13.3348
chr10	3340000	3345000	chr10_001	13.8225
chr10	3355000	3360000	chr10_001	14.0022
chr10	3275000	3280000	chr10_001	36.4416
chr10	5145000	5150000	chr10_002	4.22247
chr10	5150000	5155000	chr10_002	11.5551
chr10	5155000	5160000	chr10_002	15.2416
chr10	5165000	5170000	chr10_002	17.2236
chr10	5170000	5175000	chr10_002	14.8494
chr10	5180000	5185000	chr10_002	11.6292
chr10	5185000	5190000	chr10_002	9.23483
chr10	5195000	5200000	chr10_002	13.1753
chr10	5160000	5165000	chr10_002	17.6955
chr10	5175000	5180000	chr10_002	13.8978
chr10	5190000	5195000	chr10_002	12.6191
chr10	7865000	7870000	chr10_003	9.82584
chr10	7870000	7875000	chr10_003	10.5146
chr10	7875000	7880000	chr10_003	10.9573
chr10	7885000	7890000	chr10_003	11.0416
chr10	7890000	7895000	chr10_003	11.5449
chr10	7900000	7905000	chr10_003	10.6551
chr10	7905000	7910000	chr10_003	10.3888
chr10	7915000	7920000	chr10_003	11.9225
chr10	7920000	7925000	chr10_003	11.7056
chr10	7930000	7935000	chr10_003	11.8281
chr10	7935000	7940000	chr10_003	11.3404
chr10	7940000	7945000	chr10_003	11.2562
chr10	7950000	7955000	chr10_003	3.53371
chr10	7955000	7960000	chr10_003	7.86742
chr10	7965000	7970000	chr10_003	14.9146
chr10	7970000	7975000	chr10_003	14.7742
chr10	7980000	7985000	chr10_003	14.1213
chr10	7985000	7990000	chr10_003	14.4629
chr10	7990000	7995000	chr10_003	15.5697
chr10	8000000	8005000	chr10_003	14.373
chr10	8005000	8010000	chr10_003	13.9067
chr10	8015000	8020000	chr10_003	27.6079
chr10	8020000	8025000	chr10_003	22.7607
chr10	7880000	7885000	chr10_003	10.9191
chr10	7895000	7900000	chr10_003	11.5551
chr10	7910000	7915000	chr10_003	11.1551
chr10	7925000	7930000	chr10_003	10.8764
chr10	7945000	7950000	chr10_003	11.1404
chr10	7960000	7965000	chr10_003	14.2787
chr10	7975000	7980000	chr10_003	14.0315
chr10	8010000	8015000	chr10_003	14.9393
chr10	8025000	8030000	chr10_003	3.14382
chr10	7995000	8000000	chr10_003	13.8135
chr10	8045000	8050000	chr10_004	13.6079
chr10	8050000	8055000	chr10_004	13.1652
chr10	8055000	8060000	chr10_004	14.0989
chr10	8040000	8045000	chr10_004	12.8663
chr10	8060000	8065000	chr10_004	3.69101
chr10	8160000	8165000	chr10_005	1.33034
chr10	8165000	8170000	chr10_005	3.65618
chr10	8170000	8175000	chr10_005	4.19888
chr10	8180000	8185000	chr10_005	3.80225
chr10	8185000	8190000	chr10_005	4.22472
chr10	8195000	8200000	chr10_005	4.18202
chr10	8200000	8205000	chr10_005	3.99101
chr10	8210000	8215000	chr10_005	4.02022
chr10	8215000	8220000	chr10_005	25.8416
chr10	8225000	8230000	chr10_005	15.4921
chr10	8230000	8235000	chr10_005	14.9348
chr10	8235000	8240000	chr10_005	14.1011
chr10	8245000	8250000	chr10_005	14.291
chr10	8250000	8255000	chr10_005	14.8551
chr10	8260000	8265000	chr10_005	15.0427
chr10	8265000	8270000	chr10_005	15.3663
chr10	8275000	8280000	chr10_005	14.1124
chr10	8280000	8285000	chr10_005	15.3989
chr10	8285000	8290000	chr10_005	14.873
chr10	8295000	8300000	chr10_005	14.6034
chr10	8300000	8305000	chr10_005	14.7551
chr10	8310000	8315000	chr10_005	9.70674
chr10	8315000	8320000	chr10_005	11.1225
chr10	8325000	8330000	chr10_005	11.0843
chr10	8330000	8335000	chr10_005	11.3494
chr10	8340000	8345000	chr10_005	10.9315
chr10	8345000	8350000	chr10_005	11.9438
chr10	8350000	8355000	chr10_005	11.5124
chr10	8360000	8365000	chr10_005	11
chr10	8365000	8370000	chr10_005	11.7292
chr10	8375000	8380000	chr10_005	10.2371
chr10	8380000	8385000	chr10_005	11.7011
chr10	8390000	8395000	chr10_005	31.1809
chr10	8395000	8400000	chr10_005	36.2865
chr10	8405000	8410000	chr10_005	36.3011
chr10	8410000	8415000	chr10_005	24.5124
chr10	8415000	8420000	chr10_005	9.26067
chr10	8175000	8180000	chr10_005	4.03483
chr10	8190000	8195000	chr10_005	3.92584
chr10	8205000	8210000	chr10_005	4.02135
chr10	8220000	8225000	chr10_005	19.5955
chr10	8240000	8245000	chr10_005	10.0775
chr10	8270000	8275000	chr10_005	14.8921
chr10	8290000	8295000	chr10_005	15.4607
chr10	8305000	8310000	chr10_005	14.2966
chr10	8320000	8325000	chr10_005	10.9775
chr10	8335000	8340000	chr10_005	11.2326
chr10	8355000	8360000	chr10_005	11.4191
chr10	8370000	8375000	chr10_005	11.0539
chr10	8400000	8405000	chr10_005	34.2303
chr10	8255000	8260000	chr10_005	14.4427
chr10	8385000	8390000	chr10_005	20.1663
chr10	8440000	8445000	chr10_006	20.8753
chr10	8445000	8450000	chr10_006	20.9854
chr10	8455000	8460000	chr10_006	20.9506
chr10	8460000	8465000	chr10_006	21.4461
chr10	8465000	8470000	chr10_006	31.5798
chr10	8475000	8480000	chr10_006	5.09888
chr10	8480000	8485000	chr10_006	10.4371
chr10	8490000	8495000	chr10_006	22.5674
chr10	8495000	8500000	chr10_006	18.2674
chr10	8505000	8510000	chr10_006	19.118
chr10	8510000	8515000	chr10_006	17.6225
chr10	8520000	8525000	chr10_006	4.17079
chr10	8525000	8530000	chr10_006	4.85169
chr10	8530000	8535000	chr10_006	4.31461
chr10	8540000	8545000	chr10_006	4.46966
chr10	8545000	8550000	chr10_006	4.57079
chr10	8555000	8560000	chr10_006	4.17191
chr10	8560000	8565000	chr10_006	4.84607
chr10	8570000	8575000	chr10_006	4.79888
chr10	8575000	8580000	chr10_006	4.77303
chr10	8580000	8585000	chr10_006	4.86742
chr10	8590000	8595000	chr10_006	5.01011
chr10	8595000	8600000	chr10_006	4.69326
chr10	8605000	8610000	chr10_006	4.84494
chr10	8610000	8615000	chr10_006	4.60674
chr10	8620000	8625000	chr10_006	4.7
chr10	8625000	8630000	chr10_006	4.77303
chr10	8635000	8640000	chr10_006	11.4292
chr10	8640000	8645000	chr10_006	15.4427
chr10	8645000	8650000	chr10_006	17.3955
chr10	8655000	8660000	chr10_006	16.7067
chr10	8660000	8665000	chr10_006	16.9011
chr10	8670000	8675000	chr10_006	16.8854
chr10	8675000	8680000	chr10_006	17.0191
chr10	8685000	8690000	chr10_006	16.5652
chr10	8690000	8695000	chr10_006	16.6708
chr10	8700000	8705000	chr10_006	16.509
chr10	8705000	8710000	chr10_006	16.5831
chr10	8710000	8715000	chr10_006	16.4079
chr10	8720000	8725000	chr10_006	15.0663
chr10	8725000	8730000	chr10_006	10.4135
chr10	8735000	8740000	chr10_006	4.45506
chr10	8740000	8745000	chr10_006	4.76629
chr10	8750000	8755000	chr10_006	3.09213
chr10	8755000	8760000	chr10_006	12.6034
chr10	8760000	8765000	chr10_006	23.664
chr10	8770000	8775000	chr10_006	26.1393
chr10	8775000	8780000	chr10_006	26.0281
chr10	8785000	8790000	chr10_006	12.3944
chr10	8790000	8795000	chr10_006	12.9551
chr10	8800000	8805000	chr10_006	13.2382
chr10	8805000	8810000	chr10_006	12.4865
chr10	8815000	8820000	chr10_006	25.8562
chr10	8820000	8825000	chr10_006	24.1258
chr10	8825000	8830000	chr10_006	25.4404
chr10	8835000	8840000	chr10_006	22.7775
chr10	8840000	8845000	chr10_006	26.3787
chr10	8850000	8855000	chr10_006	25.8618
chr10	8855000	8860000	chr10_006	25.6494
chr10	8865000	8870000	chr10_006	25.6337
chr10	8870000	8875000	chr10_006	23.9225
chr10	8875000	8880000	chr10_006	26.4348
chr10	8885000	8890000	chr10_006	12.9472
chr10	8890000	8895000	chr10_006	12.8045
chr10	8900000	8905000	chr10_006	13.2382
chr10	8905000	8910000	chr10_006	10.8843
chr10	8915000	8920000	chr10_006	6.56966
chr10	8435000	8440000	chr10_006	13.9483
chr10	8450000	8455000	chr10_006	19.627
chr10	8470000	8475000	chr10_006	10.2562
chr10	8485000	8490000	chr10_006	23.5225
chr10	8500000	8505000	chr10_006	18.4719
chr10	8535000	8540000	chr10_006	4.35169
chr10	8550000	8555000	chr10_006	4.67191
chr10	8565000	8570000	chr10_006	4.82697
chr10	8585000	8590000	chr10_006	4.7236
chr10	8600000	8605000	chr10_006	4.55843
chr10	8615000	8620000	chr10_006	4.92247
chr10	8630000	8635000	chr10_006	4.59663
chr10	8665000	8670000	chr10_006	15.5618
chr10	8680000	8685000	chr10_006	17.2888
chr10	8695000	8700000	chr10_006	17.1663
chr10	8715000	8720000	chr10_006	16.9191
chr10	8730000	8735000	chr10_006	4.87079
chr10	8745000	8750000	chr10_006	4.43483
chr10	8765000	8770000	chr10_006	26.0404
chr10	8795000	8800000	chr10_006	12.7315
chr10	8810000	8815000	chr10_006	20.5022
chr10	8830000	8835000	chr10_006	24.0876
chr10	8845000	8850000	chr10_006	23.2663
chr10	8860000	8865000	chr10_006	24.5764
chr10	8880000	8885000	chr10_006	17.6079
chr10	8895000	8900000	chr10_006	12.4258
chr10	8515000	8520000	chr10_006	15.6506
chr10	8650000	8655000	chr10_006	17.5034
chr10	8780000	8785000	chr10_006	19.1618
chr10	8910000	8915000	chr10_006	9.4573
chr10	8980000	8985000	chr10_007	15.0067
chr10	8985000	8990000	chr10_007	9.13708
chr10	8975000	8980000	chr10_007	14.0393
chr10	9195000	9200000	chr10_008	2.62584
chr10	9200000	9205000	chr10_008	4.72809
chr10	9210000	9215000	chr10_008	4.6573
chr10	9215000	9220000	chr10_008	4.82135
chr10	9225000	9230000	chr10_008	3.93596
chr10	9230000	9235000	chr10_008	5.07079
chr10	9235000	9240000	chr10_008	4.74494
chr10	9205000	9210000	chr10_008	5.01798
chr10	9220000	9225000	chr10_008	4.97303
chr10	9240000	9245000	chr10_008	1.44494
chr10	9430000	9435000	chr10_009	11.7213
chr10	9440000	9445000	chr10_009	12.0933
chr10	9445000	9450000	chr10_009	10.4494
chr10	9455000	9460000	chr10_009	12.7517
chr10	9460000	9465000	chr10_009	13.3539
chr10	9470000	9475000	chr10_009	13.9045
chr10	9475000	9480000	chr10_009	12.5573
chr10	9480000	9485000	chr10_009	12.5742
chr10	9490000	9495000	chr10_009	12.9753
chr10	9495000	9500000	chr10_009	12.3337
chr10	9505000	9510000	chr10_009	13.0146
chr10	9510000	9515000	chr10_009	13.627
chr10	9520000	9525000	chr10_009	11.9191
chr10	9525000	9530000	chr10_009	10.3157
chr10	9530000	9535000	chr10_009	13.2517
chr10	9540000	9545000	chr10_009	12.673
chr10	9545000	9550000	chr10_009	12.7079
chr10	9555000	9560000	chr10_009	12.2573
chr10	9560000	9565000	chr10_009	9.05281
chr10	9570000	9575000	chr10_009	13.1011
chr10	9575000	9580000	chr10_009	13.1483
chr10	9585000	9590000	chr10_009	12.3966
chr10	9590000	9595000	chr10_009	13.1438
chr10	9595000	9600000	chr10_009	11.2809
chr10	9605000	9610000	chr10_009	13.3978
chr10	9610000	9615000	chr10_009	12.7449
chr10	9620000	9625000	chr10_009	12.3101
chr10	9625000	9630000	chr10_009	8.23596
chr10	9635000	9640000	chr10_009	11.4101
chr10	9640000	9645000	chr10_009	13.6708
chr10	9645000	9650000	chr10_009	7.61236
chr10	9450000	9455000	chr10_009	12.7629
chr10	9465000	9470000	chr10_009	12.2955
chr10	9485000	9490000	chr10_009	13.2292
chr10	9500000	9505000	chr10_009	13.0899
chr10	9515000	9520000	chr10_009	12.2101
chr10	9535000	9540000	chr10_009	12.982
chr10	9550000	9555000	chr10_009	13.409
chr10	9580000	9585000	chr10_009	13.0775
chr10	9600000	9605000	chr10_009	13.1067
chr10	9615000	9620000	chr10_009	13.0888
chr10	9630000	9635000	chr10_009	12.182
chr10	9565000	9570000	chr10_009	8.39438
chr10	9435000	9440000	chr10_009	12.3045
chr10	10505000	10510000	chr10_010	13.6888
chr10	10510000	10515000	chr10_010	20.9921
chr10	10520000	10525000	chr10_010	21.8112
chr10	10525000	10530000	chr10_010	26.2438
chr10	10535000	10540000	chr10_010	14.6472
chr10	10540000	10545000	chr10_010	14.8157
chr10	10545000	10550000	chr10_010	14.3742
chr10	10555000	10560000	chr10_010	14.7798
chr10	10560000	10565000	chr10_010	14.9865
chr10	10570000	10575000	chr10_010	15.2112
chr10	10575000	10580000	chr10_010	14.7236
chr10	10585000	10590000	chr10_010	29.3584
chr10	10590000	10595000	chr10_010	28.236
chr10	10595000	10600000	chr10_010	20.8438
chr10	10605000	10610000	chr10_010	27.7955
chr10	10610000	10615000	chr10_010	28.9202
chr10	10620000	10625000	chr10_010	28.4607
chr10	10625000	10630000	chr10_010	29.8056
chr10	10635000	10640000	chr10_010	29.2584
chr10	10640000	10645000	chr10_010	27.0404
chr10	10650000	10655000	chr10_010	20.3022
chr10	10655000	10660000	chr10_010	14.936
chr10	10660000	10665000	chr10_010	13.3607
chr10	10670000	10675000	chr10_010	14.764
chr10	10675000	10680000	chr10_010	15.4079
chr10	10685000	10690000	chr10_010	15.3854
chr10	10690000	10695000	chr10_010	10.2888
chr10	10700000	10705000	chr10_010	15.2067
chr10	10705000	10710000	chr10_010	13.5742
chr10	10710000	10715000	chr10_010	14.7551
chr10	10720000	10725000	chr10_010	30.0438
chr10	10725000	10730000	chr10_010	29.5775
chr10	10735000	10740000	chr10_010	14.5461
chr10	10740000	10745000	chr10_010	31.0933
chr10	10750000	10755000	chr10_010	31.3461
chr10	10755000	10760000	chr10_010	31.9461
chr10	10765000	10770000	chr10_010	33.1753
chr10	10770000	10775000	chr10_010	30.9596
chr10	10775000	10780000	chr10_010	30.5674
chr10	10785000	10790000	chr10_010	30.6944
chr10	10790000	10795000	chr10_010	29.7528
chr10	10800000	10805000	chr10_010	31.3966
chr10	10805000	10810000	chr10_010	30.8236
chr10	10815000	10820000	chr10_010	29.5551
chr10	10820000	10825000	chr10_010	35.7584
chr10	10830000	10835000	chr10_010	31.009
chr10	10835000	10840000	chr10_010	31.0663
chr10	10840000	10845000	chr10_010	22.3708
chr10	10850000	10855000	chr10_010	14.8258
chr10	10855000	10860000	chr10_010	15.4067
chr10	10865000	10870000	chr10_010	15.0787
chr10	10870000	10875000	chr10_010	14.4315
chr10	10880000	10885000	chr10_010	15.1449
chr10	10885000	10890000	chr10_010	14.818
chr10	10890000	10895000	chr10_010	14.8371
chr10	10900000	10905000	chr10_010	15.7629
chr10	10905000	10910000	chr10_010	14.9663
chr10	10915000	10920000	chr10_010	20.2921
chr10	10920000	10925000	chr10_010	30.7584
chr10	10930000	10935000	chr10_010	31.127
chr10	10935000	10940000	chr10_010	30.3315
chr10	10945000	10950000	chr10_010	27.9888
chr10	10950000	10955000	chr10_010	28.5978
chr10	10955000	10960000	chr10_010	28.0393
chr10	10965000	10970000	chr10_010	17.8326
chr10	10970000	10975000	chr10_010	14.6573
chr10	10980000	10985000	chr10_010	27.127
chr10	10985000	10990000	chr10_010	28.4618
chr10	10995000	11000000	chr10_010	33.8798
chr10	11000000	11005000	chr10_010	15.0573
chr10	10515000	10520000	chr10_010	25.6449
chr10	10530000	10535000	chr10_010	24.5247
chr10	10550000	10555000	chr10_010	14.2157
chr10	10565000	10570000	chr10_010	15.5876
chr10	10580000	10585000	chr10_010	28.2202
chr10	10600000	10605000	chr10_010	26.2865
chr10	10630000	10635000	chr10_010	28.8348
chr10	10645000	10650000	chr10_010	29.1933
chr10	10665000	10670000	chr10_010	15.1876
chr10	10680000	10685000	chr10_010	15.0753
chr10	10695000	10700000	chr10_010	5.15281
chr10	10715000	10720000	chr10_010	15.236
chr10	10730000	10735000	chr10_010	21.2416
chr10	10760000	10765000	chr10_010	33.1854
chr10	10780000	10785000	chr10_010	31.5022
chr10	10795000	10800000	chr10_010	30.4461
chr10	10810000	10815000	chr10_010	29.0247
chr10	10825000	10830000	chr10_010	31.7742
chr10	10845000	10850000	chr10_010	15.6607
chr10	10860000	10865000	chr10_010	14.9607
chr10	10895000	10900000	chr10_010	14.1966
chr10	10910000	10915000	chr10_010	14.8292
chr10	10925000	10930000	chr10_010	29.2169
chr10	10940000	10945000	chr10_010	30.7213
chr10	10960000	10965000	chr10_010	28.9854
chr10	10975000	10980000	chr10_010	17.2
chr10	10990000	10995000	chr10_010	26.8809
chr10	10615000	10620000	chr10_010	27.2
chr10	10745000	10750000	chr10_010	31.1
chr10	10875000	10880000	chr10_010	14.7483
chr10	12115000	12120000	chr10_011	6.66404
chr10	12125000	12130000	chr10_011	12.327
chr10	12130000	12135000	chr10_011	12.7787
chr10	12135000	12140000	chr10_011	12.3393
chr10	12145000	12150000	chr10_011	12.8742
chr10	12150000	12155000	chr10_011	13.4775
chr10	12160000	12165000	chr10_011	12.364
chr10	12165000	12170000	chr10_011	12.7472
chr10	12175000	12180000	chr10_011	12.7045
chr10	12180000	12185000	chr10_011	13.0955
chr10	12190000	12195000	chr10_011	12.5809
chr10	12195000	12200000	chr10_011	14.6652
chr10	12200000	12205000	chr10_011	13.6056
chr10	12210000	12215000	chr10_011	13.8494
chr10	12215000	12220000	chr10_011	12.6011
chr10	12225000	12230000	chr10_011	13.7034
chr10	12230000	12235000	chr10_011	13.2247
chr10	12240000	12245000	chr10_011	13.6213
chr10	12245000	12250000	chr10_011	13.7798
chr10	12250000	12255000	chr10_011	13.9371
chr10	12260000	12265000	chr10_011	12.5876
chr10	12265000	12270000	chr10_011	10.4674
chr10	12275000	12280000	chr10_011	12.8966
chr10	12280000	12285000	chr10_011	13.0775
chr10	12120000	12125000	chr10_011	12.582
chr10	12140000	12145000	chr10_011	13.3079
chr10	12155000	12160000	chr10_011	12.3034
chr10	12170000	12175000	chr10_011	10.9989
chr10	12205000	12210000	chr10_011	13.7798
chr10	12220000	12225000	chr10_011	14.7562
chr10	12235000	12240000	chr10_011	12.6281
chr10	12255000	12260000	chr10_011	14.2865
chr10	12270000	12275000	chr10_011	13.2213
chr10	12285000	12290000	chr10_011	10.5663
chr10	12185000	12190000	chr10_011	13.3067
chr10	12470000	12475000	chr10_012	19.564
chr10	12475000	12480000	chr10_012	14.5798
chr10	12485000	12490000	chr10_012	13.8775
chr10	12490000	12495000	chr10_012	12.3663
chr10	12495000	12500000	chr10_012	12.7371
chr10	12505000	12510000	chr10_012	13.3607
chr10	12510000	12515000	chr10_012	12.7674
chr10	12520000	12525000	chr10_012	13.1079
chr10	12525000	12530000	chr10_012	12.9528
chr10	12535000	12540000	chr10_012	13.8124
chr10	12540000	12545000	chr10_012	13.8067
chr10	12545000	12550000	chr10_012	13.5404
chr10	12555000	12560000	chr10_012	12.809
chr10	12560000	12565000	chr10_012	4.3
chr10	12465000	12470000	chr10_012	7.42809
chr10	12480000	12485000	chr10_012	13.2506
chr10	12500000	12505000	chr10_012	13.0921
chr10	12515000	12520000	chr10_012	13.291
chr10	12530000	12535000	chr10_012	12.7663
chr10	12550000	12555000	chr10_012	13.4528
chr10	12565000	12570000	chr10_012	5.59213
chr12	55380000	55385000	chr12_001	12.8303
chr12	55385000	55390000	chr12_001	19.3966
chr12	55395000	55400000	chr12_001	20.0146
chr12	55400000	55405000	chr12_001	7.51685
chr12	55390000	55395000	chr12_001	19.4764
chr12	55740000	55745000	chr12_002	9.69775
chr12	55745000	55750000	chr12_002	27.2697
chr12	55735000	55740000	chr12_002	8.70225
chr12	55750000	55755000	chr12_002	1.07753
chr12	58005000	58010000	chr12_003	37.9281
chr12	58010000	58015000	chr12_003	44.6989
chr12	58020000	58025000	chr12_003	40.8539
chr12	58025000	58030000	chr12_003	28.0562
chr12	58015000	58020000	chr12_003	46.5494
chr12	58030000	58035000	chr12_003	28.1101
chr12	58050000	58055000	chr12_004	23.8607
chr12	58055000	58060000	chr12_004	22.8124
chr12	58065000	58070000	chr12_004	12.3135
chr12	58070000	58075000	chr12_004	13.3281
chr12	58075000	58080000	chr12_004	13.0978
chr12	58085000	58090000	chr12_004	13.4899
chr12	58090000	58095000	chr12_004	14.2506
chr12	58100000	58105000	chr12_004	13.291
chr12	58105000	58110000	chr12_004	12.964
chr12	58115000	58120000	chr12_004	13.4831
chr12	58120000	58125000	chr12_004	19.5865
chr12	58125000	58130000	chr12_004	30.8292
chr12	58135000	58140000	chr12_004	29.2348
chr12	58140000	58145000	chr12_004	26.2079
chr12	58150000	58155000	chr12_004	45.7494
chr12	58155000	58160000	chr12_004	42.1966
chr12	58080000	58085000	chr12_004	14.373
chr12	58095000	58100000	chr12_004	14.0989
chr12	58110000	58115000	chr12_004	13.8663
chr12	58130000	58135000	chr12_004	27.6472
chr12	58145000	58150000	chr12_004	29.3382
chr12	58160000	58165000	chr12_004	33.6281
chr12	58060000	58065000	chr12_004	13.2135
chr12	58540000	58545000	chr12_005	15.8449
chr12	58920000	58925000	chr12_006	13.2348
chr12	58925000	58930000	chr12_006	27.8315
chr12	58935000	58940000	chr12_006	2.56292
chr12	58930000	58935000	chr12_006	40.9562
chr12	60540000	60545000	chr12_007	63.6011
chr12	60545000	60550000	chr12_007	52.0888
chr12	60550000	60555000	chr12_007	16.3753
chr12	65025000	65030000	chr12_008	15.0483
chr12	65865000	65870000	chr12_009	24.173
chr12	65870000	65875000	chr12_009	29.3831
chr12	65875000	65880000	chr12_009	27.2618
chr12	65885000	65890000	chr12_009	28.8809
chr12	65890000	65895000	chr12_009	36.1989
chr12	65900000	65905000	chr12_009	44.5056
chr12	65905000	65910000	chr12_009	45.4022
chr12	65915000	65920000	chr12_009	30.309
chr12	65920000	65925000	chr12_009	28.8281
chr12	65930000	65935000	chr12_009	29.7663
chr12	65935000	65940000	chr12_009	27.9169
chr12	65940000	65945000	chr12_009	22.0629
chr12	65950000	65955000	chr12_009	20.1494
chr12	65955000	65960000	chr12_009	27.6764
chr12	65965000	65970000	chr12_009	27.4157
chr12	65970000	65975000	chr12_009	29.9247
chr12	65980000	65985000	chr12_009	28.1337
chr12	65985000	65990000	chr12_009	27.9337
chr12	65995000	66000000	chr12_009	26.8494
chr12	66000000	66005000	chr12_009	13.6506
chr12	66005000	66010000	chr12_009	25.482
chr12	66015000	66020000	chr12_009	28.6404
chr12	66020000	66025000	chr12_009	30.4
chr12	66030000	66035000	chr12_009	15.1674
chr12	66035000	66040000	chr12_009	16.2955
chr12	66045000	66050000	chr12_009	19.5989
chr12	66050000	66055000	chr12_009	33.4404
chr12	66055000	66060000	chr12_009	26.8371
chr12	66065000	66070000	chr12_009	6.08652
chr12	65860000	65865000	chr12_009	11.0169
chr12	65880000	65885000	chr12_009	29.5933
chr12	65895000	65900000	chr12_009	44.682
chr12	65910000	65915000	chr12_009	43.9449
chr12	65945000	65950000	chr12_009	11.8753
chr12	65960000	65965000	chr12_009	28.364
chr12	65975000	65980000	chr12_009	27.5449
chr12	65990000	65995000	chr12_009	30.109
chr12	66010000	66015000	chr12_009	29.6944
chr12	66025000	66030000	chr12_009	21.3157
chr12	66040000	66045000	chr12_009	21.3787
chr12	65925000	65930000	chr12_009	28.5371
chr12	66060000	66065000	chr12_009	26.3169
chr12	66210000	66215000	chr12_010	12.8303
chr12	66215000	66220000	chr12_010	9.03371
chr12	66225000	66230000	chr12_010	13.3865
chr12	66230000	66235000	chr12_010	13.8663
chr12	66235000	66240000	chr12_010	13.1079
chr12	66245000	66250000	chr12_010	11.0449
chr12	66205000	66210000	chr12_010	10.2213
chr12	66220000	66225000	chr12_010	12.6034
chr12	66240000	66245000	chr12_010	13.1404
chr12	66505000	66510000	chr12_011	13.891
chr12	66510000	66515000	chr12_011	15.1022
chr12	66520000	66525000	chr12_011	12.9067
chr12	66525000	66530000	chr12_011	7.31461
chr12	66530000	66535000	chr12_011	14.2854
chr12	66540000	66545000	chr12_011	14.1596
chr12	66545000	66550000	chr12_011	14.0674
chr12	66555000	66560000	chr12_011	14.9247
chr12	66560000	66565000	chr12_011	13.4382
chr12	66570000	66575000	chr12_011	14.1843
chr12	66575000	66580000	chr12_011	6.14719
chr12	66500000	66505000	chr12_011	2.05056
chr12	66515000	66520000	chr12_011	13.3528
chr12	66535000	66540000	chr12_011	15.327
chr12	66550000	66555000	chr12_011	13.5034
chr12	66565000	66570000	chr12_011	12.4056
chr12	67060000	67065000	chr12_012	13.8382
chr12	67865000	67870000	chr12_013	3.75393
chr12	67860000	67865000	chr12_013	17.0169
chr12	69075000	69080000	chr12_014	19.8292
chr12	69080000	69085000	chr12_014	53.0618
chr12	69085000	69090000	chr12_014	50.4449
chr12	69095000	69100000	chr12_014	16.6326
chr12	69100000	69105000	chr12_014	13.4427
chr12	69110000	69115000	chr12_014	25.7944
chr12	69115000	69120000	chr12_014	25.8528
chr12	69125000	69130000	chr12_014	26.9112
chr12	69130000	69135000	chr12_014	24.5517
chr12	69135000	69140000	chr12_014	38.8573
chr12	69145000	69150000	chr12_014	40.1202
chr12	69150000	69155000	chr12_014	39.0584
chr12	69160000	69165000	chr12_014	51.1742
chr12	69165000	69170000	chr12_014	50.9303
chr12	69175000	69180000	chr12_014	55.9247
chr12	69180000	69185000	chr12_014	49.2966
chr12	69190000	69195000	chr12_014	60.9876
chr12	69195000	69200000	chr12_014	61.6831
chr12	69200000	69205000	chr12_014	42.1966
chr12	69210000	69215000	chr12_014	49.6281
chr12	69215000	69220000	chr12_014	57.2404
chr12	69225000	69230000	chr12_014	51.0562
chr12	69230000	69235000	chr12_014	61.964
chr12	69240000	69245000	chr12_014	53.3438
chr12	69245000	69250000	chr12_014	69.6079
chr12	69250000	69255000	chr12_014	68.0955
chr12	69260000	69265000	chr12_014	67.2899
chr12	69265000	69270000	chr12_014	54.3146
chr12	69275000	69280000	chr12_014	70.5753
chr12	69280000	69285000	chr12_014	72.4652
chr12	69290000	69295000	chr12_014	62.2034
chr12	69295000	69300000	chr12_014	61.9416
chr12	69305000	69310000	chr12_014	52.7517
chr12	69310000	69315000	chr12_014	45.4472
chr12	69315000	69320000	chr12_014	43.6337
chr12	69325000	69330000	chr12_014	58.6045
chr12	69330000	69335000	chr12_014	59.3787
chr12	69340000	69345000	chr12_014	50.5124
chr12	69345000	69350000	chr12_014	63.4202
chr12	69355000	69360000	chr12_014	65.1517
chr12	69360000	69365000	chr12_014	66.3539
chr12	69370000	69375000	chr12_014	68.0236
chr12	69375000	69380000	chr12_014	74.6798
chr12	69380000	69385000	chr12_014	82.0573
chr12	69390000	69395000	chr12_014	71.882
chr12	69395000	69400000	chr12_014	74.3247
chr12	69405000	69410000	chr12_014	63.4854
chr12	69410000	69415000	chr12_014	62.1674
chr12	69420000	69425000	chr12_014	82.3652
chr12	69425000	69430000	chr12_014	69.7112
chr12	69430000	69435000	chr12_014	75.273
chr12	69440000	69445000	chr12_014	66.1157
chr12	69445000	69450000	chr12_014	52.4843
chr12	69455000	69460000	chr12_014	44.6045
chr12	69460000	69465000	chr12_014	42.5652
chr12	69470000	69475000	chr12_014	42.6674
chr12	69475000	69480000	chr12_014	36.7236
chr12	69485000	69490000	chr12_014	4.02921
chr12	69090000	69095000	chr12_014	37.3944
chr12	69105000	69110000	chr12_014	14.5202
chr12	69120000	69125000	chr12_014	22.8461
chr12	69140000	69145000	chr12_014	39.5596
chr12	69155000	69160000	chr12_014	45.3674
chr12	69170000	69175000	chr12_014	51.5022
chr12	69185000	69190000	chr12_014	54.2124
chr12	69220000	69225000	chr12_014	58.1315
chr12	69235000	69240000	chr12_014	59.564
chr12	69255000	69260000	chr12_014	68.7472
chr12	69270000	69275000	chr12_014	61.2079
chr12	69285000	69290000	chr12_014	66.0124
chr12	69300000	69305000	chr12_014	57.7483
chr12	69320000	69325000	chr12_014	48.2225
chr12	69350000	69355000	chr12_014	64.3787
chr12	69365000	69370000	chr12_014	68.8506
chr12	69385000	69390000	chr12_014	32.0978
chr12	69400000	69405000	chr12_014	69.7562
chr12	69415000	69420000	chr12_014	74.9022
chr12	69435000	69440000	chr12_014	62.2551
chr12	69450000	69455000	chr12_014	45.7011
chr12	69480000	69485000	chr12_014	39.7809
chr12	69335000	69340000	chr12_014	56.3382
chr12	69465000	69470000	chr12_014	47.8899
chr12	69205000	69210000	chr12_014	53.0506
chr12	69505001	69510000	chr12_015	22.8292
chr12	69510000	69515000	chr12_015	42.9191
chr12	69520000	69525000	chr12_015	42.4101
chr12	69525000	69530000	chr12_015	41.3809
chr12	69535000	69540000	chr12_015	39.736
chr12	69540000	69545000	chr12_015	43.8022
chr12	69545000	69550000	chr12_015	33.1303
chr12	69555000	69560000	chr12_015	27.4921
chr12	69560000	69565000	chr12_015	26.9427
chr12	69570000	69575000	chr12_015	28.4809
chr12	69575000	69580000	chr12_015	28.3809
chr12	69585000	69590000	chr12_015	25.1764
chr12	69590000	69595000	chr12_015	27.3618
chr12	69600000	69605000	chr12_015	27.0135
chr12	69605000	69610000	chr12_015	25.7225
chr12	69610000	69615000	chr12_015	26.0281
chr12	69620000	69625000	chr12_015	25.0427
chr12	69625000	69630000	chr12_015	25.6775
chr12	69635000	69640000	chr12_015	26.3708
chr12	69640000	69645000	chr12_015	25.4876
chr12	69650000	69655000	chr12_015	26.7371
chr12	69655000	69660000	chr12_015	32.7382
chr12	69665000	69670000	chr12_015	39.7865
chr12	69670000	69675000	chr12_015	35.0854
chr12	69675000	69680000	chr12_015	35.9573
chr12	69685000	69690000	chr12_015	40.0809
chr12	69690000	69695000	chr12_015	36.382
chr12	69700000	69705000	chr12_015	26.9596
chr12	69705000	69710000	chr12_015	36.6787
chr12	69715000	69720000	chr12_015	37.5438
chr12	69720000	69725000	chr12_015	39.382
chr12	69725000	69730000	chr12_015	37.6843
chr12	69735000	69740000	chr12_015	38.7337
chr12	69740000	69745000	chr12_015	34.2404
chr12	69750000	69755000	chr12_015	34.4787
chr12	69755000	69760000	chr12_015	34.7966
chr12	69765000	69770000	chr12_015	32.2506
chr12	69770000	69775000	chr12_015	39.0202
chr12	69780000	69785000	chr12_015	14.2652
chr12	69785000	69790000	chr12_015	20.0449
chr12	69790000	69795000	chr12_015	19.1213
chr12	69800000	69805000	chr12_015	14.6124
chr12	69805000	69810000	chr12_015	14.2584
chr12	69815000	69820000	chr12_015	14.5315
chr12	69820000	69825000	chr12_015	14.8809
chr12	69830000	69835000	chr12_015	15.0966
chr12	69835000	69840000	chr12_015	13.8393
chr12	69845000	69850000	chr12_015	14.1629
chr12	69850000	69855000	chr12_015	14.2034
chr12	69855000	69860000	chr12_015	13.8978
chr12	69865000	69870000	chr12_015	15.3798
chr12	69870000	69875000	chr12_015	12.1933
chr12	69880000	69885000	chr12_015	14.9663
chr12	69885000	69890000	chr12_015	14.4775
chr12	69895000	69900000	chr12_015	14.8438
chr12	69900000	69905000	chr12_015	14.1764
chr12	69905000	69910000	chr12_015	14.4865
chr12	69915000	69920000	chr12_015	11.6888
chr12	69920000	69925000	chr12_015	11.6719
chr12	69930000	69935000	chr12_015	10.7978
chr12	69935000	69940000	chr12_015	11.9067
chr12	69945000	69950000	chr12_015	11.1697
chr12	69950000	69955000	chr12_015	12.9169
chr12	69960000	69965000	chr12_015	13.0157
chr12	69965000	69970000	chr12_015	12.8528
chr12	69970000	69975000	chr12_015	13.5213
chr12	69980000	69985000	chr12_015	12.5742
chr12	69985000	69990000	chr12_015	12.4483
chr12	69995000	70000000	chr12_015	11.4876
chr12	70000000	70005000	chr12_015	12.973
chr12	70010000	70015000	chr12_015	12.9843
chr12	70015000	70020000	chr12_015	13.1831
chr12	70020000	70025000	chr12_015	12.5562
chr12	70030000	70035000	chr12_015	12.6798
chr12	70035000	70040000	chr12_015	13.0618
chr12	70045000	70050000	chr12_015	13.0921
chr12	70050000	70055000	chr12_015	13.1775
chr12	70060000	70065000	chr12_015	12.9034
chr12	70065000	70070000	chr12_015	12.5034
chr12	70075000	70080000	chr12_015	13
chr12	70080000	70085000	chr12_015	12.5888
chr12	70085000	70090000	chr12_015	12.2056
chr12	70095000	70100000	chr12_015	11.6449
chr12	70100000	70105000	chr12_015	12.4112
chr12	70110000	70115000	chr12_015	12.0674
chr12	70115000	70120000	chr12_015	11.9966
chr12	70125000	70130000	chr12_015	12.5888
chr12	70130000	70135000	chr12_015	10.218
chr12	70140000	70145000	chr12_015	12.7258
chr12	70145000	70150000	chr12_015	12.3225
chr12	70150000	70155000	chr12_015	9.64382
chr12	70160000	70165000	chr12_015	11.8494
chr12	70165000	70170000	chr12_015	5.97978
chr12	70175000	70180000	chr12_015	12.5326
chr12	70180000	70185000	chr12_015	13.4371
chr12	70190000	70195000	chr12_015	11.0438
chr12	70195000	70200000	chr12_015	8.37079
chr12	70200000	70205000	chr12_015	7.31011
chr12	70210000	70215000	chr12_015	12.1067
chr12	70215000	70220000	chr12_015	12.3517
chr12	70225000	70230000	chr12_015	12.7461
chr12	70230000	70235000	chr12_015	12.8022
chr12	70240000	70245000	chr12_015	11.5247
chr12	70245000	70250000	chr12_015	9.35955
chr12	70255000	70260000	chr12_015	8.83596
chr12	70260000	70265000	chr12_015	12.8067
chr12	70265000	70270000	chr12_015	11.9213
chr12	70275000	70280000	chr12_015	13.0494
chr12	70280000	70285000	chr12_015	12.3169
chr12	70290000	70295000	chr12_015	13.2371
chr12	70295000	70300000	chr12_015	21.9135
chr12	70305000	70310000	chr12_015	13.1899
chr12	70310000	70315000	chr12_015	12.664
chr12	70315000	70320000	chr12_015	12.209
chr12	70325000	70330000	chr12_015	13.3506
chr12	70330000	70335000	chr12_015	8.3
chr12	70340000	70345000	chr12_015	13.1809
chr12	70345000	70350000	chr12_015	12.2404
chr12	69515000	69520000	chr12_015	44.873
chr12	69530000	69535000	chr12_015	41.2573
chr12	69550000	69555000	chr12_015	24.7506
chr12	69565000	69570000	chr12_015	26.4888
chr12	69580000	69585000	chr12_015	24.7146
chr12	69615000	69620000	chr12_015	26.282
chr12	69630000	69635000	chr12_015	18.3045
chr12	69645000	69650000	chr12_015	27.1011
chr12	69660000	69665000	chr12_015	39.6011
chr12	69680000	69685000	chr12_015	34.9584
chr12	69695000	69700000	chr12_015	41.1202
chr12	69710000	69715000	chr12_015	38.0865
chr12	69745000	69750000	chr12_015	38.3404
chr12	69760000	69765000	chr12_015	40.0112
chr12	69775000	69780000	chr12_015	30.5483
chr12	69795000	69800000	chr12_015	14.9888
chr12	69810000	69815000	chr12_015	14.2719
chr12	69825000	69830000	chr12_015	16.064
chr12	69840000	69845000	chr12_015	15.1933
chr12	69875000	69880000	chr12_015	14
chr12	69890000	69895000	chr12_015	15.0225
chr12	69910000	69915000	chr12_015	13.9303
chr12	69925000	69930000	chr12_015	12.4461
chr12	69940000	69945000	chr12_015	12.8506
chr12	69955000	69960000	chr12_015	12.309
chr12	69975000	69980000	chr12_015	11.0528
chr12	70005000	70010000	chr12_015	12.2775
chr12	70025000	70030000	chr12_015	12.4955
chr12	70040000	70045000	chr12_015	13.336
chr12	70055000	70060000	chr12_015	12.3888
chr12	70070000	70075000	chr12_015	12.173
chr12	70090000	70095000	chr12_015	11.3303
chr12	70105000	70110000	chr12_015	13.1787
chr12	70135000	70140000	chr12_015	13.2135
chr12	70155000	70160000	chr12_015	13.0112
chr12	70170000	70175000	chr12_015	4.75618
chr12	70185000	70190000	chr12_015	12.8573
chr12	70205000	70210000	chr12_015	13.7382
chr12	70220000	70225000	chr12_015	12.1371
chr12	70235000	70240000	chr12_015	12.5584
chr12	70270000	70275000	chr12_015	11.8303
chr12	70285000	70290000	chr12_015	11.9247
chr12	70300000	70305000	chr12_015	18.3225
chr12	70320000	70325000	chr12_015	12.4101
chr12	70335000	70340000	chr12_015	4.70449
chr12	70350000	70355000	chr12_015	12.5067
chr12	69595000	69600000	chr12_015	28.4787
chr12	69730000	69735000	chr12_015	39.0169
chr12	69860000	69865000	chr12_015	11.773
chr12	69990000	69995000	chr12_015	13.1371
chr12	70120000	70125000	chr12_015	13.5843
chr12	70250000	70255000	chr12_015	12.5888
chr12	70360001	70365000	chr12_016	5.44944
chr12	70370000	70375000	chr12_016	5.19213
chr12	70365000	70370000	chr12_016	4.90562
chr12	70380001	70385000	chr12_017	10.9517
chr12	70390000	70395000	chr12_017	11.7551
chr12	70395000	70400000	chr12_017	17.8393
chr12	70405000	70410000	chr12_017	11.3854
chr12	70410000	70415000	chr12_017	10.9326
chr12	70420000	70425000	chr12_017	23.4281
chr12	70425000	70430000	chr12_017	25.9483
chr12	70435000	70440000	chr12_017	10.7809
chr12	70440000	70445000	chr12_017	12.3169
chr12	70445000	70450000	chr12_017	11.0899
chr12	70455000	70460000	chr12_017	11.6921
chr12	70460000	70465000	chr12_017	11.673
chr12	70470000	70475000	chr12_017	11.4292
chr12	70475000	70480000	chr12_017	10.0393
chr12	70485000	70490000	chr12_017	11.4169
chr12	70490000	70495000	chr12_017	10.9146
chr12	70495000	70500000	chr12_017	11.6742
chr12	70505000	70510000	chr12_017	12.5921
chr12	70510000	70515000	chr12_017	11.2674
chr12	70520000	70525000	chr12_017	10.5079
chr12	70525000	70530000	chr12_017	22.5517
chr12	70535000	70540000	chr12_017	22.473
chr12	70540000	70545000	chr12_017	24.2438
chr12	70550000	70555000	chr12_017	25.2854
chr12	70555000	70560000	chr12_017	24.6371
chr12	70560000	70565000	chr12_017	23.1191
chr12	70570000	70575000	chr12_017	24.3685
chr12	70575000	70580000	chr12_017	11.6337
chr12	70585000	70590000	chr12_017	11.9596
chr12	70590000	70595000	chr12_017	10.8
chr12	70600000	70605000	chr12_017	11.6517
chr12	70605000	70610000	chr12_017	11.1202
chr12	70610000	70615000	chr12_017	11.1011
chr12	70620000	70625000	chr12_017	11.4124
chr12	70625000	70630000	chr12_017	9.63146
chr12	70635000	70640000	chr12_017	9.90787
chr12	70640000	70645000	chr12_017	12.182
chr12	70650000	70655000	chr12_017	11.6416
chr12	70655000	70660000	chr12_017	14.4135
chr12	70665000	70670000	chr12_017	16.6292
chr12	70670000	70675000	chr12_017	17.082
chr12	70675000	70680000	chr12_017	15.2719
chr12	70685000	70690000	chr12_017	15.7292
chr12	70690000	70695000	chr12_017	12.7337
chr12	70700000	70705000	chr12_017	11.6393
chr12	70705000	70710000	chr12_017	14.5685
chr12	70715000	70720000	chr12_017	12.1315
chr12	70720000	70725000	chr12_017	12.1067
chr12	70730000	70735000	chr12_017	11.2427
chr12	70735000	70740000	chr12_017	12.5618
chr12	70740000	70745000	chr12_017	11.4011
chr12	70750000	70755000	chr12_017	12.682
chr12	70755000	70760000	chr12_017	11.3843
chr12	70765000	70770000	chr12_017	27.2157
chr12	70770000	70775000	chr12_017	25.9933
chr12	70780000	70785000	chr12_017	26.927
chr12	70785000	70790000	chr12_017	26.3124
chr12	70790000	70795000	chr12_017	35.7112
chr12	70800000	70805000	chr12_017	59.7596
chr12	70805000	70810000	chr12_017	42.7011
chr12	70815000	70820000	chr12_017	35.4798
chr12	70820000	70825000	chr12_017	26.5393
chr12	70830000	70835000	chr12_017	27.5101
chr12	70835000	70840000	chr12_017	28.1
chr12	70845000	70850000	chr12_017	25.0506
chr12	70850000	70855000	chr12_017	26.3562
chr12	70855000	70860000	chr12_017	27.7247
chr12	70865000	70870000	chr12_017	20.5348
chr12	70870000	70875000	chr12_017	34.118
chr12	70880000	70885000	chr12_017	27.5157
chr12	70885000	70890000	chr12_017	24.7697
chr12	70895000	70900000	chr12_017	23.2382
chr12	70900000	70905000	chr12_017	15.1674
chr12	70910000	70915000	chr12_017	16.3056
chr12	70915000	70920000	chr12_017	14.9022
chr12	70920000	70925000	chr12_017	27.8348
chr12	70930000	70935000	chr12_017	31.2978
chr12	70935000	70940000	chr12_017	29.5247
chr12	70400000	70405000	chr12_017	25.3764
chr12	70415000	70420000	chr12_017	25.1303
chr12	70430000	70435000	chr12_017	12.9281
chr12	70450000	70455000	chr12_017	11.5292
chr12	70465000	70470000	chr12_017	11.7056
chr12	70480000	70485000	chr12_017	7.05056
chr12	70500000	70505000	chr12_017	10.6472
chr12	70530000	70535000	chr12_017	23.7416
chr12	70545000	70550000	chr12_017	23.9607
chr12	70565000	70570000	chr12_017	23.918
chr12	70580000	70585000	chr12_017	11.8427
chr12	70595000	70600000	chr12_017	4.93596
chr12	70615000	70620000	chr12_017	12.5629
chr12	70630000	70635000	chr12_017	11.3528
chr12	70660000	70665000	chr12_017	16.2135
chr12	70680000	70685000	chr12_017	15.6483
chr12	70695000	70700000	chr12_017	8.1809
chr12	70710000	70715000	chr12_017	12.8584
chr12	70725000	70730000	chr12_017	12.1315
chr12	70745000	70750000	chr12_017	11.4236
chr12	70760000	70765000	chr12_017	11.0607
chr12	70795000	70800000	chr12_017	42.064
chr12	70810000	70815000	chr12_017	41.191
chr12	70825000	70830000	chr12_017	26.6663
chr12	70840000	70845000	chr12_017	27.591
chr12	70860000	70865000	chr12_017	26.1258
chr12	70875000	70880000	chr12_017	31.6876
chr12	70890000	70895000	chr12_017	25.6528
chr12	70925000	70930000	chr12_017	29.2978
chr12	70940000	70945000	chr12_017	29.3135
chr12	70385000	70390000	chr12_017	11.3382
chr12	70515000	70520000	chr12_017	11.4112
chr12	70645000	70650000	chr12_017	11.2236
chr12	70775000	70780000	chr12_017	26.0483
chr12	70905000	70910000	chr12_017	14.9045
chr12	70970001	70975000	chr12_018	6.36067
chr12	70980000	70985000	chr12_018	8.64045
chr12	70985000	70990000	chr12_018	8.64045
chr12	70995000	71000000	chr12_018	8.84157
chr12	71000000	71005000	chr12_018	7.68427
chr12	71010000	71015000	chr12_018	9.17416
chr12	71015000	71020000	chr12_018	9.27416
chr12	70975000	70980000	chr12_018	8.48989
chr12	70990000	70995000	chr12_018	8.5191
chr12	71005000	71010000	chr12_018	8.56517
chr12	71020000	71025000	chr12_018	5.71573
chr12	71030001	71035000	chr12_019	13.9292
chr12	71035000	71040000	chr12_019	13.5764
chr12	71045000	71050000	chr12_019	13.6663
chr12	71050000	71055000	chr12_019	12.5461
chr12	71060000	71065000	chr12_019	13.0011
chr12	71065000	71070000	chr12_019	12.5596
chr12	71075000	71080000	chr12_019	12.2506
chr12	71080000	71085000	chr12_019	13.7461
chr12	71085000	71090000	chr12_019	13.0798
chr12	71095000	71100000	chr12_019	12.9315
chr12	71100000	71105000	chr12_019	13.7303
chr12	71110000	71115000	chr12_019	13.0843
chr12	71115000	71120000	chr12_019	13.5292
chr12	71125000	71130000	chr12_019	12.7202
chr12	71130000	71135000	chr12_019	13.0955
chr12	71140000	71145000	chr12_019	13.9888
chr12	71145000	71150000	chr12_019	13.2989
chr12	71150000	71155000	chr12_019	13.7247
chr12	71160000	71165000	chr12_019	5.44944
chr12	71165000	71170000	chr12_019	13.4124
chr12	71175000	71180000	chr12_019	11.2742
chr12	71180000	71185000	chr12_019	13.5697
chr12	71190000	71195000	chr12_019	13.5528
chr12	71195000	71200000	chr12_019	13.0787
chr12	71205000	71210000	chr12_019	13.3865
chr12	71210000	71215000	chr12_019	12.6596
chr12	71215000	71220000	chr12_019	12.2652
chr12	71225000	71230000	chr12_019	13.4899
chr12	71230000	71235000	chr12_019	14.1135
chr12	71240000	71245000	chr12_019	7.52809
chr12	71055000	71060000	chr12_019	13.0326
chr12	71070000	71075000	chr12_019	13.1337
chr12	71090000	71095000	chr12_019	13.4393
chr12	71105000	71110000	chr12_019	12.2539
chr12	71120000	71125000	chr12_019	11.4124
chr12	71135000	71140000	chr12_019	13.3764
chr12	71155000	71160000	chr12_019	11.5517
chr12	71185000	71190000	chr12_019	13.7506
chr12	71200000	71205000	chr12_019	13.8438
chr12	71220000	71225000	chr12_019	13.2955
chr12	71235000	71240000	chr12_019	13.9483
chr12	71040000	71045000	chr12_019	12.4876
chr12	71170000	71175000	chr12_019	12.7573
chr12	71280000	71285000	chr12_020	5.88652
chr12	71290000	71295000	chr12_020	13.7461
chr12	71285000	71290000	chr12_020	15.9652
chr12	71410000	71415000	chr12_021	1.40225
chr12	71420000	71425000	chr12_021	5.2382
chr12	71425000	71430000	chr12_021	5.04494
chr12	71435000	71440000	chr12_021	5.04831
chr12	71440000	71445000	chr12_021	4.82472
chr12	71445000	71450000	chr12_021	4.8
chr12	71455000	71460000	chr12_021	13.3169
chr12	71460000	71465000	chr12_021	13.3315
chr12	71470000	71475000	chr12_021	13.7236
chr12	71475000	71480000	chr12_021	13.6045
chr12	71485000	71490000	chr12_021	10.3539
chr12	71490000	71495000	chr12_021	5.94494
chr12	71500000	71505000	chr12_021	39.0146
chr12	71505000	71510000	chr12_021	40.2393
chr12	71510000	71515000	chr12_021	19.0933
chr12	71415000	71420000	chr12_021	5.42022
chr12	71450000	71455000	chr12_021	10.8079
chr12	71465000	71470000	chr12_021	13.9438
chr12	71480000	71485000	chr12_021	11.3393
chr12	71495000	71500000	chr12_021	18.8629
chr12	71515000	71520000	chr12_021	3.11461
chr12	71430000	71435000	chr12_021	4.67865
chr12	71600000	71605000	chr12_022	2.59326
chr12	71605000	71610000	chr12_022	30.2865
chr12	71615000	71620000	chr12_022	30.182
chr12	71620000	71625000	chr12_022	27.7854
chr12	71625000	71630000	chr12_022	29.7348
chr12	71635000	71640000	chr12_022	29.3124
chr12	71640000	71645000	chr12_022	26.8169
chr12	71610000	71615000	chr12_022	28.882
chr12	71630000	71635000	chr12_022	27.6562
chr12	71645000	71650000	chr12_022	10.5798
chr12	71685000	71690000	chr12_023	30.4663
chr12	71690000	71695000	chr12_023	37.2393
chr12	71695000	71700000	chr12_023	9.22135
chr12	73360000	73365000	chr12_024	30.0539
chr12	73370000	73375000	chr12_024	55.5
chr12	73375000	73380000	chr12_024	50.4348
chr12	73365000	73370000	chr12_024	54.4247
chr12	73380000	73385000	chr12_024	12.4775
chr12	74220000	74225000	chr12_025	1.43483
chr12	74225000	74230000	chr12_025	36.4337
chr12	74230000	74235000	chr12_025	44.3517
chr12	74240000	74245000	chr12_025	39.4798
chr12	74245000	74250000	chr12_025	29.3461
chr12	74255000	74260000	chr12_025	20.8157
chr12	74260000	74265000	chr12_025	18.7157
chr12	74235000	74240000	chr12_025	41.073
chr12	74250000	74255000	chr12_025	25.8551
chr12	74265000	74270000	chr12_025	5.4
chr12	74320000	74325000	chr12_026	28.2056
chr12	74325000	74330000	chr12_026	28.6258
chr12	74335000	74340000	chr12_026	27.9708
chr12	74340000	74345000	chr12_026	19.2472
chr12	74330000	74335000	chr12_026	26.6876
chr12	74315000	74320000	chr12_026	9.70562
chr12	74425001	74430000	chr12_027	6.05506
chr12	74435000	74440000	chr12_027	44.9888
chr12	74440000	74445000	chr12_027	47.4854
chr12	74450000	74455000	chr12_027	36.2506
chr12	74455000	74460000	chr12_027	43.7584
chr12	74460000	74465000	chr12_027	45.3247
chr12	74470000	74472002	chr12_027	11.3663
chr12	74430000	74435000	chr12_027	45.1416
chr12	74465000	74470000	chr12_027	29.1809
chr12	74445000	74450000	chr12_027	47.3022
chr12	74478621	74480000	chr12_028	15.3101
chr12	74485000	74490000	chr12_028	26.8798
chr12	74490000	74492722	chr12_028	19.1348
chr12	74480000	74485000	chr12_028	35.8663
chr12	74865000	74870000	chr12_029	32.8067
chr12	74875000	74880000	chr12_029	41.5596
chr12	74880000	74885000	chr12_029	40.7079
chr12	74885000	74890000	chr12_029	37.3056
chr12	74895000	74900000	chr12_029	26.0775
chr12	74900000	74905000	chr12_029	24.2506
chr12	74910000	74915000	chr12_029	43.1506
chr12	74915000	74920000	chr12_029	43.7382
chr12	74925000	74930000	chr12_029	38.109
chr12	74930000	74935000	chr12_029	36.7416
chr12	74935000	74940000	chr12_029	46.7865
chr12	74945000	74950000	chr12_029	42.3607
chr12	74950000	74955000	chr12_029	38.5584
chr12	74960000	74965000	chr12_029	42.0404
chr12	74965000	74970000	chr12_029	42.9472
chr12	74870000	74875000	chr12_029	43.1292
chr12	74890000	74895000	chr12_029	39.0337
chr12	74905000	74910000	chr12_029	39.736
chr12	74920000	74925000	chr12_029	43.8989
chr12	74940000	74945000	chr12_029	44.0225
chr12	74955000	74960000	chr12_029	43.5034
chr12	74970000	74975000	chr12_029	13.6876
chr12	75550000	75555000	chr12_030	60.2393
chr12	75555000	75560000	chr12_030	50.5978
chr12	75565000	75570000	chr12_030	38.7483
chr12	75570000	75575000	chr12_030	27.0517
chr12	75580000	75585000	chr12_030	28.7404
chr12	75585000	75590000	chr12_030	26.6124
chr12	75590000	75595000	chr12_030	29.1022
chr12	75600000	75605000	chr12_030	28.3393
chr12	75605000	75610000	chr12_030	39.018
chr12	75615000	75620000	chr12_030	34.0966
chr12	75620000	75625000	chr12_030	22.6955
chr12	75630000	75635000	chr12_030	9.72921
chr12	75635000	75640000	chr12_030	9.17753
chr12	75645000	75650000	chr12_030	9.37528
chr12	75650000	75655000	chr12_030	5.50449
chr12	75545000	75550000	chr12_030	12.0404
chr12	75560000	75565000	chr12_030	41.7494
chr12	75575000	75580000	chr12_030	25.9775
chr12	75595000	75600000	chr12_030	28.7472
chr12	75610000	75615000	chr12_030	39.5
chr12	75640000	75645000	chr12_030	8.28315
chr12	75625000	75630000	chr12_030	13.0697
chr12	75665000	75670000	chr12_031	14.2135
chr12	75670000	75675000	chr12_031	15.8899
chr12	75680000	75685000	chr12_031	13.6708
chr12	75685000	75690000	chr12_031	16.8258
chr12	75695000	75700000	chr12_031	25.4169
chr12	75700000	75705000	chr12_031	26.7517
chr12	75705000	75710000	chr12_031	26.9685
chr12	75715000	75720000	chr12_031	27.2348
chr12	75720000	75725000	chr12_031	27.3899
chr12	75730000	75735000	chr12_031	45.9663
chr12	75735000	75740000	chr12_031	29.9742
chr12	75745000	75750000	chr12_031	16.9348
chr12	75750000	75755000	chr12_031	17.3483
chr12	75760000	75765000	chr12_031	17.9326
chr12	75765000	75770000	chr12_031	17.5753
chr12	75770000	75775000	chr12_031	16.436
chr12	75780000	75785000	chr12_031	13.6101
chr12	75660000	75665000	chr12_031	11.8213
chr12	75675000	75680000	chr12_031	14.0281
chr12	75690000	75695000	chr12_031	24.6045
chr12	75710000	75715000	chr12_031	27.1652
chr12	75725000	75730000	chr12_031	39.7135
chr12	75740000	75745000	chr12_031	27.0831
chr12	75775000	75780000	chr12_031	17.064
chr12	75755000	75760000	chr12_031	17.6438
chr12	75835000	75840000	chr12_032	12.1034
chr12	75845000	75850000	chr12_032	27.9034
chr12	75850000	75855000	chr12_032	27.7831
chr12	75860000	75865000	chr12_032	27.0719
chr12	75865000	75870000	chr12_032	28.3079
chr12	75875000	75880000	chr12_032	27.6303
chr12	75880000	75885000	chr12_032	26.5944
chr12	75885000	75890000	chr12_032	5.8236
chr12	75895000	75900000	chr12_032	16.4236
chr12	75900000	75905000	chr12_032	16.5337
chr12	75910000	75915000	chr12_032	10.5483
chr12	75915000	75920000	chr12_032	19.8573
chr12	75925000	75930000	chr12_032	29.4225
chr12	75930000	75935000	chr12_032	28.5438
chr12	75940000	75945000	chr12_032	28.1719
chr12	75945000	75950000	chr12_032	25.3079
chr12	75840000	75845000	chr12_032	20.8809
chr12	75855000	75860000	chr12_032	27.3933
chr12	75870000	75875000	chr12_032	29.9236
chr12	75905000	75910000	chr12_032	14.7067
chr12	75920000	75925000	chr12_032	27.8876
chr12	75935000	75940000	chr12_032	28.7371
chr12	75890000	75895000	chr12_032	15.5404
chr12	78850000	78855000	chr12_033	5.02697
chr12	78860000	78865000	chr12_033	27.8787
chr12	78865000	78870000	chr12_033	26.1056
chr12	78875000	78880000	chr12_033	26.2045
chr12	78880000	78885000	chr12_033	38.9213
chr12	78890000	78895000	chr12_033	32.8966
chr12	78895000	78900000	chr12_033	38.1933
chr12	78900000	78905000	chr12_033	13.3551
chr12	78910000	78915000	chr12_033	24.7494
chr12	78915000	78920000	chr12_033	25.5584
chr12	78925000	78930000	chr12_033	29.9382
chr12	78930000	78935000	chr12_033	41.0236
chr12	78940000	78945000	chr12_033	26.3607
chr12	78945000	78950000	chr12_033	15.0652
chr12	78955000	78960000	chr12_033	14.2809
chr12	78960000	78965000	chr12_033	13.882
chr12	78965000	78970000	chr12_033	13.3112
chr12	78975000	78980000	chr12_033	14.8483
chr12	78980000	78985000	chr12_033	13.6393
chr12	78990000	78995000	chr12_033	2.85281
chr12	78855000	78860000	chr12_033	31.1483
chr12	78870000	78875000	chr12_033	25.7
chr12	78885000	78890000	chr12_033	39.9371
chr12	78920000	78925000	chr12_033	26.6258
chr12	78935000	78940000	chr12_033	33.6169
chr12	78950000	78955000	chr12_033	14.4
chr12	78970000	78975000	chr12_033	14.6034
chr12	78985000	78990000	chr12_033	14.6798
chr12	78905000	78910000	chr12_033	20.6697
chr12	79110001	79115000	chr12_034	9.90674
chr12	79120000	79125000	chr12_034	15.4663
chr12	79125000	79130000	chr12_034	5.50674
chr12	79135000	79140000	chr12_034	4.62809
chr12	79140000	79145000	chr12_034	5.19663
chr12	79145000	79150000	chr12_034	4.69101
chr12	79155000	79160000	chr12_034	4.23483
chr12	79160000	79165000	chr12_034	4.86742
chr12	79170000	79175000	chr12_034	4.31798
chr12	79175000	79180000	chr12_034	4.87978
chr12	79115000	79120000	chr12_034	12.6865
chr12	79130000	79135000	chr12_034	4.75281
chr12	79150000	79155000	chr12_034	4.85169
chr12	79180000	79185000	chr12_034	5.33596
chr12	79165000	79170000	chr12_034	4.91573
chr12	79195001	79200000	chr12_035	13.2775
chr12	79735000	79740000	chr12_036	4.94157
chr12	79745000	79750000	chr12_036	12.8955
chr12	79750000	79755000	chr12_036	13.3517
chr12	79760000	79765000	chr12_036	10.0528
chr12	79765000	79770000	chr12_036	12.7764
chr12	79775000	79780000	chr12_036	13.0101
chr12	79780000	79785000	chr12_036	12.736
chr12	79785000	79790000	chr12_036	7.68652
chr12	79740000	79745000	chr12_036	12.4719
chr12	79755000	79760000	chr12_036	12.8337
chr12	79770000	79775000	chr12_036	12.4966
chr12	79810000	79815000	chr12_037	6.44494
chr12	79815000	79820000	chr12_037	20.7865
chr12	79825000	79830000	chr12_037	30.7989
chr12	79830000	79835000	chr12_037	35.0955
chr12	79840000	79845000	chr12_037	35.1989
chr12	79845000	79850000	chr12_037	33.336
chr12	79850000	79855000	chr12_037	34.2517
chr12	79860000	79865000	chr12_037	33.7135
chr12	79865000	79870000	chr12_037	34.6135
chr12	79835000	79840000	chr12_037	32.3674
chr12	79855000	79860000	chr12_037	35.0011
chr12	79870000	79875000	chr12_037	34.5191
chr12	79820000	79825000	chr12_037	24.6236
chr12	80040000	80045000	chr12_038	9.58764
chr12	82465000	82470000	chr12_039	22.1629
chr12	82470000	82475000	chr12_039	21.7348
chr12	82480000	82485000	chr12_039	15.0753
chr12	82485000	82490000	chr12_039	15.0528
chr12	82495000	82500000	chr12_039	13.2753
chr12	82500000	82505000	chr12_039	14.3787
chr12	82510000	82515000	chr12_039	25.5854
chr12	82515000	82520000	chr12_039	40.3146
chr12	82520000	82525000	chr12_039	27.7124
chr12	82530000	82535000	chr12_039	25.809
chr12	82535000	82540000	chr12_039	25.9404
chr12	82545000	82550000	chr12_039	26.3618
chr12	82550000	82555000	chr12_039	24.2494
chr12	82560000	82565000	chr12_039	25.8056
chr12	82565000	82570000	chr12_039	28.2843
chr12	82570000	82575000	chr12_039	24.9393
chr12	82580000	82585000	chr12_039	13.2809
chr12	82585000	82590000	chr12_039	12.5472
chr12	82595000	82600000	chr12_039	12.8303
[truncated: 2,666 more rows]

## Sheet: 449_CN
Chromosome	Start	End	CGR name	Copy number
chr1	170855000	170860000	chr1_001	15
chr1	170860000	170865000	chr1_001	14.772
chr1	170870000	170875000	chr1_001	13.4658
chr1	170850000	170855000	chr1_001	15.2313
chr1	170865000	170870000	chr1_001	13.5928
chr1	171050000	171055000	chr1_002	24.798
chr1	171055000	171060000	chr1_002	22.9414
chr1	171060000	171065000	chr1_002	21.9381
chr1	171070000	171075000	chr1_002	21.759
chr1	171075000	171080000	chr1_002	23.9642
chr1	171085000	171090000	chr1_002	22.8827
chr1	171090000	171095000	chr1_002	26.4853
chr1	171100000	171105000	chr1_002	24.0619
chr1	171105000	171110000	chr1_002	25.7655
chr1	171065000	171070000	chr1_002	16.3844
chr1	171080000	171085000	chr1_002	26.8632
chr1	171095000	171100000	chr1_002	26.0228
chr1	171045000	171050000	chr1_002	26.684
chr1	171175000	171180000	chr1_003	15.2345
chr1	171185000	171190000	chr1_003	16.43
chr1	171190000	171195000	chr1_003	14.0065
chr1	171200000	171205000	chr1_003	14.3811
chr1	171205000	171210000	chr1_003	17.1629
chr1	171215000	171220000	chr1_003	15.9153
chr1	171220000	171225000	chr1_003	7.40717
chr1	171195000	171200000	chr1_003	16.1531
chr1	171210000	171215000	chr1_003	15.4984
chr1	171180000	171185000	chr1_003	16.2932
chr1	171410000	171415000	chr1_004	8.4202
chr1	171415000	171420000	chr1_004	13.3355
chr1	171420000	171425000	chr1_004	14.684
chr1	171430000	171435000	chr1_004	7.53094
chr1	171425000	171430000	chr1_004	14.8306
chr1	171610000	171615000	chr1_005	14.0489
chr1	171615000	171620000	chr1_005	27.0521
chr1	171620000	171625000	chr1_005	24.1075
chr1	171690000	171695000	chr1_006	14.3192
chr1	171695000	171700000	chr1_006	15.8827
chr1	171705000	171710000	chr1_006	15.7557
chr1	171710000	171715000	chr1_006	18.3583
chr1	171715000	171720000	chr1_006	14.8925
chr1	171725000	171730000	chr1_006	16.6417
chr1	171730000	171735000	chr1_006	17.9446
chr1	171740000	171745000	chr1_006	15.6515
chr1	171745000	171750000	chr1_006	16.8958
chr1	171755000	171760000	chr1_006	20.2606
chr1	171760000	171765000	chr1_006	18.4007
chr1	171770000	171775000	chr1_006	19.6906
chr1	171775000	171780000	chr1_006	17.1042
chr1	171780000	171785000	chr1_006	16.5342
chr1	171790000	171795000	chr1_006	16.7492
chr1	171795000	171800000	chr1_006	19.1336
chr1	171805000	171810000	chr1_006	29.8046
chr1	171810000	171815000	chr1_006	25.0651
chr1	171820000	171825000	chr1_006	16.3518
chr1	171825000	171830000	chr1_006	15.6059
chr1	171830000	171835000	chr1_006	15.43
chr1	171840000	171845000	chr1_006	15.4365
chr1	171845000	171850000	chr1_006	14.8404
chr1	171855000	171860000	chr1_006	14.7296
chr1	171860000	171865000	chr1_006	14.8664
chr1	171870000	171875000	chr1_006	15.1954
chr1	171875000	171880000	chr1_006	14.7752
chr1	171885000	171890000	chr1_006	15.3583
chr1	171890000	171895000	chr1_006	15.2736
chr1	171895000	171900000	chr1_006	18.9153
chr1	171905000	171910000	chr1_006	15
chr1	171910000	171915000	chr1_006	14.5928
chr1	171920000	171925000	chr1_006	12.2736
chr1	171925000	171930000	chr1_006	13.7883
chr1	171935000	171940000	chr1_006	12.0847
chr1	171940000	171945000	chr1_006	10.8208
chr1	171945000	171950000	chr1_006	11.2769
chr1	171955000	171960000	chr1_006	10.7785
chr1	171960000	171965000	chr1_006	11.2736
chr1	171970000	171975000	chr1_006	11.0879
chr1	171975000	171980000	chr1_006	10.3746
chr1	171985000	171990000	chr1_006	10.43
chr1	171990000	171995000	chr1_006	11.456
chr1	172000000	172005000	chr1_006	10.9055
chr1	172005000	172010000	chr1_006	10.0293
chr1	172010000	172015000	chr1_006	12.7166
chr1	172020000	172025000	chr1_006	11.8339
chr1	171720000	171725000	chr1_006	18.684
chr1	171735000	171740000	chr1_006	16.0423
chr1	171750000	171755000	chr1_006	22.3453
chr1	171765000	171770000	chr1_006	21.5147
chr1	171785000	171790000	chr1_006	17.3941
chr1	171800000	171805000	chr1_006	16.8664
chr1	171815000	171820000	chr1_006	26.6678
chr1	171850000	171855000	chr1_006	15.1987
chr1	171865000	171870000	chr1_006	14.3225
chr1	171880000	171885000	chr1_006	15.43
chr1	171900000	171905000	chr1_006	13.2182
chr1	171915000	171920000	chr1_006	12.2378
chr1	171930000	171935000	chr1_006	12.5635
chr1	171950000	171955000	chr1_006	12.7036
chr1	171980000	171985000	chr1_006	10.9674
chr1	171995000	172000000	chr1_006	12.1954
chr1	172015000	172020000	chr1_006	12.0521
chr1	171700000	171705000	chr1_006	14.987
chr1	171835000	171840000	chr1_006	15.5147
chr1	171965000	171970000	chr1_006	11.2638
chr1	172035000	172040000	chr1_007	11.7622
chr1	172040000	172045000	chr1_007	11.4853
chr1	172050000	172055000	chr1_007	11.5928
chr1	172055000	172060000	chr1_007	10.7459
chr1	172065000	172070000	chr1_007	10.3713
chr1	172070000	172075000	chr1_007	8.19544
chr1	172075000	172080000	chr1_007	8.63192
chr1	172085000	172090000	chr1_007	11.0163
chr1	172090000	172095000	chr1_007	8.71661
chr1	172100000	172105000	chr1_007	9.25081
chr1	172105000	172110000	chr1_007	8.22476
chr1	172115000	172120000	chr1_007	8.7101
chr1	172120000	172125000	chr1_007	8.64169
chr1	172125000	172130000	chr1_007	8.68404
chr1	172135000	172140000	chr1_007	8.59935
chr1	172140000	172145000	chr1_007	8.52769
chr1	172150000	172155000	chr1_007	8.37785
chr1	172155000	172160000	chr1_007	8.65147
chr1	172165000	172170000	chr1_007	9.27036
chr1	172170000	172175000	chr1_007	8.54072
chr1	172180000	172185000	chr1_007	8.46906
chr1	172185000	172190000	chr1_007	8.05212
chr1	172190000	172195000	chr1_007	8.27362
chr1	172200000	172205000	chr1_007	7.6645
chr1	172205000	172210000	chr1_007	8.85668
chr1	172215000	172220000	chr1_007	17.7557
chr1	172220000	172225000	chr1_007	19.1629
chr1	172230000	172235000	chr1_007	20.9218
chr1	172235000	172240000	chr1_007	19.0586
chr1	172245000	172250000	chr1_007	18.9739
chr1	172250000	172255000	chr1_007	19.5375
chr1	172255000	172260000	chr1_007	18.5016
chr1	172265000	172270000	chr1_007	19.342
chr1	172270000	172275000	chr1_007	20.8111
chr1	172280000	172285000	chr1_007	17.7785
chr1	172285000	172290000	chr1_007	14.7915
chr1	172295000	172300000	chr1_007	19.4658
chr1	172300000	172305000	chr1_007	19.3518
chr1	172305000	172310000	chr1_007	19.3713
chr1	172315000	172320000	chr1_007	18.57
chr1	172320000	172325000	chr1_007	19.6906
chr1	172330000	172335000	chr1_007	19.6938
chr1	172335000	172340000	chr1_007	18.6384
chr1	172345000	172350000	chr1_007	21.1726
chr1	172350000	172355000	chr1_007	22.9349
chr1	172360000	172365000	chr1_007	24.3779
chr1	172365000	172370000	chr1_007	23.7524
chr1	172370000	172375000	chr1_007	30.0326
chr1	172380000	172385000	chr1_007	37.101
chr1	172385000	172390000	chr1_007	37.8925
chr1	172395000	172400000	chr1_007	32.4658
chr1	172400000	172405000	chr1_007	30.456
chr1	172410000	172415000	chr1_007	32.8339
chr1	172415000	172420000	chr1_007	37.5505
chr1	172420000	172425000	chr1_007	31.785
chr1	172430000	172435000	chr1_007	27.3616
chr1	172435000	172440000	chr1_007	29.8469
chr1	172445000	172450000	chr1_007	29.6221
chr1	172450000	172455000	chr1_007	29.6221
chr1	172460000	172465000	chr1_007	31.013
chr1	172465000	172470000	chr1_007	34.8697
chr1	172475000	172480000	chr1_007	29.9055
chr1	172480000	172485000	chr1_007	26.0293
chr1	172485000	172490000	chr1_007	25.8241
chr1	172495000	172500000	chr1_007	25.443
chr1	172500000	172505000	chr1_007	31.0782
chr1	172510000	172515000	chr1_007	28.7915
chr1	172515000	172520000	chr1_007	24.2834
chr1	172525000	172530000	chr1_007	26.4723
chr1	172530000	172535000	chr1_007	33.0456
chr1	172540000	172545000	chr1_007	30.2215
chr1	172545000	172550000	chr1_007	36.2215
chr1	172550000	172555000	chr1_007	34.7622
chr1	172560000	172565000	chr1_007	11.6221
chr1	172565000	172570000	chr1_007	18.0586
chr1	172575000	172580000	chr1_007	19.0814
chr1	172580000	172585000	chr1_007	20.7557
chr1	172590000	172595000	chr1_007	14.8925
chr1	172595000	172600000	chr1_007	22.4723
chr1	172600000	172605000	chr1_007	23.8958
chr1	172610000	172615000	chr1_007	27.1759
chr1	172615000	172620000	chr1_007	22.9446
chr1	172625000	172630000	chr1_007	22.456
chr1	172630000	172635000	chr1_007	22.9121
chr1	172640000	172645000	chr1_007	22.4723
chr1	172645000	172650000	chr1_007	20.0228
chr1	172655000	172660000	chr1_007	24.2215
chr1	172660000	172665000	chr1_007	18.7394
chr1	172665000	172670000	chr1_007	22.9316
chr1	172675000	172680000	chr1_007	21.5635
chr1	172680000	172685000	chr1_007	19.2834
chr1	172690000	172695000	chr1_007	20.5016
chr1	172695000	172700000	chr1_007	20.886
chr1	172705000	172710000	chr1_007	18.8339
chr1	172710000	172715000	chr1_007	21.215
chr1	172715000	172720000	chr1_007	23.3583
chr1	172725000	172730000	chr1_007	21.7948
chr1	172730000	172735000	chr1_007	22.2606
chr1	172740000	172745000	chr1_007	20.8306
chr1	172745000	172750000	chr1_007	20.4593
chr1	172755000	172760000	chr1_007	22.0456
chr1	172760000	172765000	chr1_007	18.6515
chr1	172770000	172775000	chr1_007	22.772
chr1	172775000	172780000	chr1_007	12.5016
chr1	172780000	172785000	chr1_007	9.68404
chr1	172790000	172795000	chr1_007	9.04235
chr1	172795000	172800000	chr1_007	8.65472
chr1	172805000	172810000	chr1_007	8.39088
chr1	172810000	172815000	chr1_007	8.557
chr1	172820000	172825000	chr1_007	9.24756
chr1	172825000	172830000	chr1_007	8.41694
chr1	172030000	172035000	chr1_007	9.78827
chr1	172045000	172050000	chr1_007	12.7915
chr1	172060000	172065000	chr1_007	9.09121
chr1	172080000	172085000	chr1_007	9.11075
chr1	172110000	172115000	chr1_007	8.69707
chr1	172130000	172135000	chr1_007	8.7329
chr1	172145000	172150000	chr1_007	8.05863
chr1	172160000	172165000	chr1_007	7.73616
chr1	172175000	172180000	chr1_007	8.28013
chr1	172195000	172200000	chr1_007	8.07166
chr1	172210000	172215000	chr1_007	8.55049
chr1	172240000	172245000	chr1_007	19.4007
chr1	172260000	172265000	chr1_007	19.8208
chr1	172275000	172280000	chr1_007	18.9609
chr1	172290000	172295000	chr1_007	20.6547
chr1	172310000	172315000	chr1_007	19.241
chr1	172325000	172330000	chr1_007	19.2345
chr1	172340000	172345000	chr1_007	18.2182
chr1	172375000	172380000	chr1_007	37.6873
chr1	172390000	172395000	chr1_007	38.7492
chr1	172405000	172410000	chr1_007	26.9967
chr1	172425000	172430000	chr1_007	29.0651
chr1	172440000	172445000	chr1_007	27.1694
chr1	172455000	172460000	chr1_007	29.7296
chr1	172470000	172475000	chr1_007	28.7492
chr1	172505000	172510000	chr1_007	26.3257
chr1	172520000	172525000	chr1_007	25.2248
chr1	172535000	172540000	chr1_007	14.5407
chr1	172555000	172560000	chr1_007	35.5342
chr1	172570000	172575000	chr1_007	19.8274
chr1	172585000	172590000	chr1_007	15.3453
chr1	172605000	172610000	chr1_007	23.7622
chr1	172635000	172640000	chr1_007	21.0684
chr1	172650000	172655000	chr1_007	20.8534
chr1	172670000	172675000	chr1_007	21.8371
chr1	172685000	172690000	chr1_007	23.0228
chr1	172700000	172705000	chr1_007	18.1401
chr1	172720000	172725000	chr1_007	19.4463
chr1	172735000	172740000	chr1_007	22.2345
chr1	172765000	172770000	chr1_007	18.886
chr1	172785000	172790000	chr1_007	8.98046
chr1	172800000	172805000	chr1_007	8.36156
chr1	172815000	172820000	chr1_007	8.11401
chr1	172095000	172100000	chr1_007	8.85993
chr1	172225000	172230000	chr1_007	18.7101
chr1	172355000	172360000	chr1_007	24.7492
chr1	172490000	172495000	chr1_007	26.1596
chr1	172620000	172625000	chr1_007	19.645
chr1	172750000	172755000	chr1_007	19.5505
chr1	178250000	178255000	chr1_008	23.202
chr1	178260000	178265000	chr1_008	26.5928
chr1	178265000	178270000	chr1_008	30.0065
chr1	178275000	178280000	chr1_008	29.1564
chr1	178280000	178285000	chr1_008	28.0391
chr1	178285000	178290000	chr1_008	13.9577
chr1	178295000	178300000	chr1_008	17.0749
chr1	178270000	178275000	chr1_008	34.0293
chr1	178290000	178295000	chr1_008	31.4007
chr1	178255000	178260000	chr1_008	25.5342
chr1	181835000	181840000	chr1_009	27.9739
chr1	181840000	181845000	chr1_009	59.1954
chr1	181850000	181855000	chr1_009	25.4821
chr1	181855000	181860000	chr1_009	21.7785
chr1	181865000	181870000	chr1_009	24.6515
chr1	181870000	181875000	chr1_009	23.8469
chr1	181880000	181885000	chr1_009	28.8339
chr1	181885000	181890000	chr1_009	28.7622
chr1	181890000	181895000	chr1_009	25.013
chr1	181900000	181905000	chr1_009	23.2671
chr1	181905000	181910000	chr1_009	22.5733
chr1	181915000	181920000	chr1_009	23.7101
chr1	181920000	181925000	chr1_009	20.9414
chr1	181930000	181935000	chr1_009	25.8339
chr1	181935000	181940000	chr1_009	24.8143
chr1	181845000	181850000	chr1_009	59.873
chr1	181860000	181865000	chr1_009	24.2378
chr1	181875000	181880000	chr1_009	25.5375
chr1	181895000	181900000	chr1_009	27.2899
chr1	181910000	181915000	chr1_009	21.8176
chr1	181940000	181945000	chr1_009	21.215
chr1	181925000	181930000	chr1_009	23.5407
chr1	182310000	182315000	chr1_010	6.94788
chr1	182315000	182320000	chr1_010	78.443
chr1	183830000	183835000	chr1_011	40.6091
chr1	183835000	183840000	chr1_011	73.5147
chr1	183845000	183850000	chr1_011	55.6156
chr1	183850000	183855000	chr1_011	97.4169
chr1	183855000	183860000	chr1_011	70.6645
chr1	183840000	183845000	chr1_011	66.4625
chr1	183860000	183865000	chr1_011	45.4528
chr1	184100000	184105000	chr1_012	21.0945
chr1	184110000	184115000	chr1_012	30.6384
chr1	184115000	184120000	chr1_012	7.39414
chr1	184105000	184110000	chr1_012	27.0586
chr1	185685000	185690000	chr1_013	14.1857
chr1	185690000	185695000	chr1_013	14.2117
chr1	185700000	185705000	chr1_013	15.1857
chr1	185705000	185710000	chr1_013	14.6906
chr1	185695000	185700000	chr1_013	13.316
chr1	185710000	185715000	chr1_013	11.9414
chr1	185750000	185755000	chr1_014	50.9544
chr1	185755000	185760000	chr1_014	51.1368
chr1	185765000	185770000	chr1_014	48.7687
chr1	185770000	185775000	chr1_014	47.7166
chr1	185780000	185785000	chr1_014	68.1205
chr1	185785000	185790000	chr1_014	71.228
chr1	185795000	185800000	chr1_014	70.0586
chr1	185800000	185805000	chr1_014	69.013
chr1	185805000	185810000	chr1_014	66.8274
chr1	185815000	185820000	chr1_014	51.2476
chr1	185820000	185825000	chr1_014	46.3355
chr1	185830000	185835000	chr1_014	38.5733
chr1	185835000	185840000	chr1_014	37.3909
chr1	185845000	185850000	chr1_014	39.5407
chr1	185850000	185855000	chr1_014	38.4853
chr1	185855000	185860000	chr1_014	19.5831
chr1	185865000	185870000	chr1_014	39.4853
chr1	185870000	185875000	chr1_014	38.7134
chr1	185880000	185885000	chr1_014	39.0977
chr1	185885000	185890000	chr1_014	31.1401
chr1	185895000	185900000	chr1_014	61.6971
chr1	185900000	185905000	chr1_014	61.0977
chr1	185910000	185915000	chr1_014	62.7166
chr1	185915000	185920000	chr1_014	53.9772
chr1	185920000	185925000	chr1_014	81.8958
chr1	185930000	185935000	chr1_014	79.4625
chr1	185935000	185940000	chr1_014	59.9055
chr1	185945000	185950000	chr1_014	59.7785
chr1	185950000	185955000	chr1_014	58.684
chr1	185960000	185965000	chr1_014	37.2508
chr1	185965000	185970000	chr1_014	36.7622
chr1	185975000	185980000	chr1_014	34.7948
chr1	185980000	185985000	chr1_014	39.0619
chr1	185985000	185990000	chr1_014	48.4821
chr1	185995000	186000000	chr1_014	61.0521
chr1	186000000	186005000	chr1_014	60.4756
chr1	186010000	186015000	chr1_014	50.2541
chr1	186015000	186020000	chr1_014	48.6352
chr1	186025000	186030000	chr1_014	52.1759
chr1	186030000	186035000	chr1_014	40.8925
chr1	186035000	186040000	chr1_014	42.3746
chr1	186045000	186050000	chr1_014	45.2866
chr1	186050000	186055000	chr1_014	41.9414
chr1	186060000	186065000	chr1_014	43.9902
chr1	186065000	186070000	chr1_014	45.2476
chr1	186075000	186080000	chr1_014	44.9349
chr1	186080000	186085000	chr1_014	43.5863
chr1	186090000	186095000	chr1_014	13.4397
chr1	186095000	186100000	chr1_014	14.316
chr1	186100000	186105000	chr1_014	13.9805
chr1	186110000	186115000	chr1_014	28.6971
chr1	186115000	186120000	chr1_014	29.9055
chr1	186125000	186130000	chr1_014	19.9055
chr1	186130000	186135000	chr1_014	28.8404
chr1	186140000	186145000	chr1_014	26.759
chr1	186145000	186150000	chr1_014	27.5733
chr1	186150000	186155000	chr1_014	26.6254
chr1	186160000	186165000	chr1_014	30.1205
chr1	186165000	186170000	chr1_014	27.8404
chr1	186175000	186180000	chr1_014	31.4463
chr1	186180000	186185000	chr1_014	28.2345
chr1	186190000	186195000	chr1_014	31.1368
chr1	186195000	186200000	chr1_014	29.6091
chr1	186205000	186210000	chr1_014	29.9609
chr1	186210000	186215000	chr1_014	28.8274
chr1	186215000	186220000	chr1_014	31.7459
chr1	186225000	186230000	chr1_014	24.4756
chr1	186230000	186235000	chr1_014	30.1498
chr1	186240000	186245000	chr1_014	37.2117
chr1	186245000	186250000	chr1_014	37.2573
chr1	186255000	186260000	chr1_014	25.2671
chr1	186260000	186265000	chr1_014	17.101
chr1	185760000	185765000	chr1_014	46.5896
chr1	185775000	185780000	chr1_014	45.4235
chr1	185790000	185795000	chr1_014	67.5375
chr1	185810000	185815000	chr1_014	51.4169
chr1	185825000	185830000	chr1_014	43.0912
chr1	185840000	185845000	chr1_014	36.8632
chr1	185875000	185880000	chr1_014	37.43
chr1	185890000	185895000	chr1_014	47.8436
chr1	185905000	185910000	chr1_014	57.8762
chr1	185925000	185930000	chr1_014	86.2606
chr1	185940000	185945000	chr1_014	61.1759
chr1	185955000	185960000	chr1_014	39.1857
chr1	185970000	185975000	chr1_014	37.7459
chr1	186005000	186010000	chr1_014	50.6612
chr1	186020000	186025000	chr1_014	59.2997
chr1	186040000	186045000	chr1_014	43.1629
chr1	186055000	186060000	chr1_014	44.57
chr1	186070000	186075000	chr1_014	43.2997
chr1	186085000	186090000	chr1_014	38.8599
chr1	186105000	186110000	chr1_014	25.6221
chr1	186135000	186140000	chr1_014	30.101
chr1	186155000	186160000	chr1_014	29.5928
chr1	186170000	186175000	chr1_014	30.7459
chr1	186185000	186190000	chr1_014	26.0749
chr1	186200000	186205000	chr1_014	29.1922
chr1	186220000	186225000	chr1_014	26.6743
chr1	186235000	186240000	chr1_014	33.9739
chr1	186265000	186270000	chr1_014	13.0782
chr1	185860000	185865000	chr1_014	34.57
chr1	185990000	185995000	chr1_014	52.2345
chr1	186120000	186125000	chr1_014	27.3779
chr1	186250000	186255000	chr1_014	31.7883
chr1	186280000	186285000	chr1_015	11.6384
chr1	186290000	186295000	chr1_015	13.1889
chr1	186295000	186300000	chr1_015	13.0489
chr1	186305000	186310000	chr1_015	13.3029
chr1	186310000	186315000	chr1_015	13.5081
chr1	186320000	186325000	chr1_015	13.6059
chr1	186325000	186330000	chr1_015	14.1173
chr1	186330000	186335000	chr1_015	13.7134
chr1	186340000	186345000	chr1_015	13.2801
chr1	186345000	186350000	chr1_015	14.0847
chr1	186355000	186360000	chr1_015	14.0651
chr1	186360000	186365000	chr1_015	16.3811
chr1	186370000	186375000	chr1_015	22.3094
chr1	186375000	186380000	chr1_015	21.3485
chr1	186385000	186390000	chr1_015	21.9316
chr1	186390000	186395000	chr1_015	22.7166
chr1	186395000	186400000	chr1_015	26.6971
chr1	186405000	186410000	chr1_015	36.9283
chr1	186410000	186415000	chr1_015	16.6254
chr1	186420000	186425000	chr1_015	8.90554
chr1	186425000	186430000	chr1_015	8.27362
chr1	186435000	186440000	chr1_015	9.1987
chr1	186440000	186445000	chr1_015	9.10098
chr1	186450000	186455000	chr1_015	9.8241
chr1	186455000	186460000	chr1_015	9.87296
chr1	186460000	186465000	chr1_015	9.34528
chr1	186470000	186475000	chr1_015	14.8534
chr1	186475000	186480000	chr1_015	15.443
chr1	186485000	186490000	chr1_015	15.6091
chr1	186490000	186495000	chr1_015	16.1661
chr1	186500000	186505000	chr1_015	16.759
chr1	186505000	186510000	chr1_015	15.329
chr1	186510000	186515000	chr1_015	14.0619
chr1	186520000	186525000	chr1_015	14.5472
chr1	186525000	186530000	chr1_015	13.5472
chr1	186535000	186540000	chr1_015	14.3257
chr1	186540000	186545000	chr1_015	15.0033
chr1	186550000	186555000	chr1_015	15.2964
chr1	186555000	186560000	chr1_015	10.5212
chr1	186565000	186570000	chr1_015	9.51466
chr1	186570000	186575000	chr1_015	8.72964
chr1	186575000	186580000	chr1_015	10.013
chr1	186585000	186590000	chr1_015	10.1792
chr1	186590000	186595000	chr1_015	11.5635
chr1	186600000	186605000	chr1_015	24.8339
chr1	186605000	186610000	chr1_015	21.2899
chr1	186615000	186620000	chr1_015	22.9511
chr1	186620000	186625000	chr1_015	26.5407
chr1	186625000	186630000	chr1_015	26.1042
chr1	186635000	186640000	chr1_015	21.3485
chr1	186640000	186645000	chr1_015	13.2182
chr1	186650000	186655000	chr1_015	13.8567
chr1	186655000	186660000	chr1_015	13.6352
chr1	186285000	186290000	chr1_015	13.873
chr1	186300000	186305000	chr1_015	13.456
chr1	186315000	186320000	chr1_015	14.342
chr1	186335000	186340000	chr1_015	13.3616
chr1	186350000	186355000	chr1_015	13.4039
chr1	186365000	186370000	chr1_015	21.6417
chr1	186400000	186405000	chr1_015	34.0945
chr1	186415000	186420000	chr1_015	8.99349
chr1	186430000	186435000	chr1_015	9.70684
chr1	186445000	186450000	chr1_015	9.58632
chr1	186465000	186470000	chr1_015	10.684
chr1	186480000	186485000	chr1_015	18.9642
chr1	186495000	186500000	chr1_015	16.0391
chr1	186530000	186535000	chr1_015	14.645
chr1	186545000	186550000	chr1_015	16.5896
chr1	186560000	186565000	chr1_015	9.69381
chr1	186580000	186585000	chr1_015	11.0717
chr1	186595000	186600000	chr1_015	18.2573
chr1	186610000	186615000	chr1_015	18.0065
chr1	186630000	186635000	chr1_015	22.7264
chr1	186660000	186665000	chr1_015	14.1824
chr1	186380000	186385000	chr1_015	21.5668
chr1	186515000	186520000	chr1_015	15.5342
chr1	186645000	186650000	chr1_015	13.8176
chr1	186680000	186685000	chr1_016	11.8827
chr1	186685000	186690000	chr1_016	12.0619
chr1	186690000	186695000	chr1_016	11.1694
chr1	186700000	186705000	chr1_016	12.5049
chr1	186675000	186680000	chr1_016	11.3713
chr1	186695000	186700000	chr1_016	13.3681
chr1	188015000	188020000	chr1_017	8.39414
chr1	188025000	188030000	chr1_017	10.658
chr1	188030000	188035000	chr1_017	11.1336
chr1	188040000	188045000	chr1_017	11.7231
chr1	188045000	188050000	chr1_017	9.6873
chr1	188050000	188055000	chr1_017	9.83062
chr1	188020000	188025000	chr1_017	10.5798
chr1	188035000	188040000	chr1_017	10.57
chr1	188270000	188275000	chr1_018	29.9739
chr1	188275000	188280000	chr1_018	50.5049
chr1	188285000	188290000	chr1_018	50.9935
chr1	188290000	188295000	chr1_018	51.3909
chr1	188295000	188300000	chr1_018	51.0782
chr1	188305000	188310000	chr1_018	69.9772
chr1	188310000	188315000	chr1_018	55.2313
chr1	188320000	188325000	chr1_018	47.4756
chr1	188325000	188330000	chr1_018	66.9316
chr1	188335000	188340000	chr1_018	61.0358
chr1	188340000	188345000	chr1_018	48.3322
chr1	188345000	188350000	chr1_018	40.355
chr1	188355000	188360000	chr1_018	36.4007
chr1	188360000	188365000	chr1_018	33.8306
chr1	188280000	188285000	chr1_018	52.5863
chr1	188300000	188305000	chr1_018	51.9544
chr1	188315000	188320000	chr1_018	64.2573
chr1	188330000	188335000	chr1_018	61.1368
chr1	188365000	188370000	chr1_018	32.9479
chr1	188350000	188355000	chr1_018	35.8078
chr1	188375000	188380000	chr1_019	34.2573
chr1	188385000	188390000	chr1_019	46.5635
chr1	188390000	188395000	chr1_019	35.1661
chr1	188400000	188405000	chr1_019	38.241
chr1	188405000	188410000	chr1_019	36.3941
chr1	188410000	188415000	chr1_019	20.886
chr1	188420000	188425000	chr1_019	22.1954
chr1	188425000	188430000	chr1_019	22.873
chr1	188435000	188440000	chr1_019	22.6124
chr1	188440000	188445000	chr1_019	18.5375
chr1	188380000	188385000	chr1_019	96.2052
chr1	188395000	188400000	chr1_019	38.671
chr1	188415000	188420000	chr1_019	19.5244
chr1	188430000	188435000	chr1_019	21.798
chr1	188485000	188490000	chr1_020	16.2769
chr1	188490000	188495000	chr1_020	18.9283
chr1	188500000	188505000	chr1_020	18.0033
chr1	188505000	188510000	chr1_020	17.9153
chr1	188515000	188520000	chr1_020	18.2997
chr1	188520000	188525000	chr1_020	17.658
chr1	188525000	188530000	chr1_020	12.5537
chr1	188535000	188540000	chr1_020	16.9707
chr1	188540000	188545000	chr1_020	35.7296
chr1	188550000	188555000	chr1_020	35.5114
chr1	188555000	188560000	chr1_020	34.9186
chr1	188565000	188570000	chr1_020	36.4528
chr1	188570000	188575000	chr1_020	34.8567
chr1	188580000	188585000	chr1_020	37.6124
chr1	188585000	188590000	chr1_020	36.3583
chr1	188590000	188595000	chr1_020	34.4397
chr1	188600000	188605000	chr1_020	21.8795
chr1	188605000	188610000	chr1_020	17.7068
chr1	188615000	188620000	chr1_020	29.8176
chr1	188620000	188625000	chr1_020	30.5733
chr1	188630000	188635000	chr1_020	18.3844
chr1	188635000	188640000	chr1_020	21.9153
chr1	188640000	188645000	chr1_020	41.5277
chr1	188650000	188655000	chr1_020	40.7199
chr1	188655000	188660000	chr1_020	40.0782
chr1	188665000	188670000	chr1_020	39.3485
chr1	188670000	188675000	chr1_020	46.6417
chr1	188680000	188685000	chr1_020	41.1433
chr1	188685000	188690000	chr1_020	42.1238
chr1	188695000	188700000	chr1_020	71
chr1	188700000	188705000	chr1_020	66.1433
chr1	188705000	188710000	chr1_020	62.8893
chr1	188715000	188720000	chr1_020	64.1173
chr1	188720000	188725000	chr1_020	44.3388
chr1	188730000	188735000	chr1_020	66.6319
chr1	188735000	188740000	chr1_020	70.5277
chr1	188745000	188750000	chr1_020	54.57
chr1	188750000	188755000	chr1_020	54.329
chr1	188755000	188760000	chr1_020	53.7948
chr1	188765000	188770000	chr1_020	55.7264
chr1	188770000	188775000	chr1_020	48.2573
chr1	188780000	188785000	chr1_020	69.5603
chr1	188785000	188790000	chr1_020	88.0456
chr1	188795000	188800000	chr1_020	99.5537
chr1	188800000	188805000	chr1_020	95.6384
chr1	188810000	188815000	chr1_020	110.707
chr1	188815000	188820000	chr1_020	100.622
chr1	188820000	188825000	chr1_020	120.795
chr1	188830000	188835000	chr1_020	105.915
chr1	188835000	188840000	chr1_020	110.619
chr1	188845000	188850000	chr1_020	75.8143
chr1	188850000	188855000	chr1_020	76.1694
chr1	188860000	188865000	chr1_020	75.9837
chr1	188865000	188870000	chr1_020	74.3485
chr1	188875000	188880000	chr1_020	85.8046
chr1	188880000	188885000	chr1_020	86.8306
chr1	188885000	188890000	chr1_020	85.9707
chr1	188895000	188900000	chr1_020	83.1303
chr1	188900000	188905000	chr1_020	84.5765
chr1	188910000	188915000	chr1_020	80.4495
chr1	188915000	188920000	chr1_020	82.456
chr1	188925000	188930000	chr1_020	89.7362
chr1	188930000	188935000	chr1_020	83.9739
chr1	188935000	188940000	chr1_020	56.0847
chr1	188945000	188950000	chr1_020	57.2248
chr1	188950000	188955000	chr1_020	65.4007
chr1	188960000	188965000	chr1_020	61.0847
chr1	188965000	188970000	chr1_020	55.5831
chr1	188975000	188980000	chr1_020	62.3257
chr1	188980000	188985000	chr1_020	59.5081
chr1	188990000	188995000	chr1_020	40.4169
chr1	188995000	189000000	chr1_020	51.3844
chr1	189000000	189005000	chr1_020	49.7362
chr1	189010000	189015000	chr1_020	54.0651
chr1	189015000	189020000	chr1_020	53.0554
chr1	189025000	189030000	chr1_020	51.5831
chr1	189030000	189035000	chr1_020	51.4821
chr1	189040000	189045000	chr1_020	52.9055
chr1	189045000	189050000	chr1_020	49.0261
chr1	189055000	189060000	chr1_020	53.7231
chr1	189060000	189065000	chr1_020	53.2866
chr1	189065000	189070000	chr1_020	54.5961
chr1	189075000	189080000	chr1_020	51.4365
chr1	189080000	189085000	chr1_020	57.5147
chr1	189090000	189095000	chr1_020	56.1661
chr1	189095000	189100000	chr1_020	17.8176
chr1	188495000	188500000	chr1_020	18.9153
chr1	188510000	188515000	chr1_020	18.5798
chr1	188530000	188535000	chr1_020	18.0228
chr1	188545000	188550000	chr1_020	35.4267
chr1	188560000	188565000	chr1_020	35.1661
chr1	188575000	188580000	chr1_020	38.9414
chr1	188595000	188600000	chr1_020	35.202
chr1	188625000	188630000	chr1_020	21.443
chr1	188645000	188650000	chr1_020	39.6156
chr1	188660000	188665000	chr1_020	39.456
chr1	188675000	188680000	chr1_020	42.9349
chr1	188690000	188695000	chr1_020	63.3681
chr1	188710000	188715000	chr1_020	62.1694
chr1	188725000	188730000	chr1_020	47.798
chr1	188760000	188765000	chr1_020	53.5179
chr1	188775000	188780000	chr1_020	51.873
chr1	188790000	188795000	chr1_020	100.7
chr1	188805000	188810000	chr1_020	121.974
chr1	188825000	188830000	chr1_020	124.73
chr1	188840000	188845000	chr1_020	95.0033
chr1	188855000	188860000	chr1_020	74.2215
chr1	188890000	188895000	chr1_020	87.6221
chr1	188905000	188910000	chr1_020	89.5765
chr1	188920000	188925000	chr1_020	82.3388
chr1	188940000	188945000	chr1_020	47.3225
chr1	188955000	188960000	chr1_020	62.1368
chr1	188970000	188975000	chr1_020	50.6515
chr1	188985000	188990000	chr1_020	57.3388
chr1	189020000	189025000	chr1_020	51.0847
chr1	189035000	189040000	chr1_020	51.4951
chr1	189050000	189055000	chr1_020	55.0358
chr1	189070000	189075000	chr1_020	54.7427
chr1	189085000	189090000	chr1_020	51.0358
chr1	188480000	188485000	chr1_020	6.73616
chr1	188610000	188615000	chr1_020	29.2769
chr1	188870000	188875000	chr1_020	82.9283
chr1	189005000	189010000	chr1_020	55.3811
chr1	188740000	188745000	chr1_020	63.7752
chr1	189535000	189540000	chr1_021	9.98697
chr1	189540000	189545000	chr1_021	11.0261
chr1	189550000	189555000	chr1_021	11.6189
chr1	189555000	189560000	chr1_021	12.2378
chr1	189565000	189570000	chr1_021	12.3192
chr1	189570000	189575000	chr1_021	12.4202
chr1	189580000	189585000	chr1_021	11.7394
chr1	189585000	189590000	chr1_021	11.9186
chr1	189590000	189595000	chr1_021	12.557
chr1	189600000	189605000	chr1_021	7.94463
chr1	189545000	189550000	chr1_021	12.7655
chr1	189560000	189565000	chr1_021	13.4104
chr1	189575000	189580000	chr1_021	12.3225
chr1	189595000	189600000	chr1_021	12.7362
chr1	190735000	190740000	chr1_022	11.8469
chr1	190745000	190750000	chr1_022	12.544
chr1	190750000	190755000	chr1_022	12.5896
chr1	190760000	190765000	chr1_022	12.2117
chr1	190740000	190745000	chr1_022	12.7427
chr1	190755000	190760000	chr1_022	12.798
chr1	194790000	194795000	chr1_023	14.3355
chr1	194795000	194800000	chr1_023	14.1596
chr1	194800000	194805000	chr1_023	14.9218
chr1	194810000	194815000	chr1_023	21.9218
chr1	194815000	194820000	chr1_023	15.9381
chr1	194825000	194830000	chr1_023	13.3974
chr1	194830000	194835000	chr1_023	12.8632
chr1	194840000	194845000	chr1_023	13.2997
chr1	194845000	194850000	chr1_023	12.4984
chr1	194855000	194860000	chr1_023	12.4658
chr1	194860000	194865000	chr1_023	12.1042
chr1	194865000	194870000	chr1_023	12.8078
chr1	194875000	194880000	chr1_023	10.3029
chr1	194880000	194885000	chr1_023	12.2866
chr1	194890000	194895000	chr1_023	17.5863
chr1	194895000	194900000	chr1_023	13.1954
chr1	194905000	194910000	chr1_023	13.557
chr1	194910000	194915000	chr1_023	13.2476
chr1	194915000	194920000	chr1_023	12.7427
chr1	194925000	194930000	chr1_023	13.3388
chr1	194930000	194935000	chr1_023	24.1303
chr1	194940000	194945000	chr1_023	27.3388
chr1	194945000	194950000	chr1_023	27.6971
chr1	194955000	194960000	chr1_023	26.1368
chr1	194960000	194965000	chr1_023	25.7915
chr1	194970000	194975000	chr1_023	29.5733
chr1	194975000	194980000	chr1_023	27.9642
chr1	194980000	194985000	chr1_023	29.3322
chr1	194990000	194995000	chr1_023	12.5668
chr1	194785000	194790000	chr1_023	10.6254
chr1	194805000	194810000	chr1_023	15.7199
chr1	194820000	194825000	chr1_023	13.2378
chr1	194835000	194840000	chr1_023	12.2638
chr1	194850000	194855000	chr1_023	13.5179
chr1	194870000	194875000	chr1_023	12.1922
chr1	194885000	194890000	chr1_023	13.0521
chr1	194920000	194925000	chr1_023	12.9511
chr1	194935000	194940000	chr1_023	27.013
chr1	194950000	194955000	chr1_023	28.5765
chr1	194965000	194970000	chr1_023	28.2182
chr1	194985000	194990000	chr1_023	28.9577
chr1	194900000	194905000	chr1_023	13.3648
chr10	3265000	3270000	chr10_001	48.9674
chr10	3270000	3275000	chr10_001	69.0521
chr10	3280000	3285000	chr10_001	53.3485
chr10	3285000	3290000	chr10_001	45.2476
chr10	3295000	3300000	chr10_001	16.443
chr10	3300000	3305000	chr10_001	19.9446
chr10	3310000	3315000	chr10_001	16.1564
chr10	3315000	3320000	chr10_001	19.544
chr10	3320000	3325000	chr10_001	16.2736
chr10	3330000	3335000	chr10_001	19.7296
chr10	3335000	3340000	chr10_001	20.5309
chr10	3345000	3350000	chr10_001	14.3941
chr10	3350000	3355000	chr10_001	16.6352
chr10	3360000	3365000	chr10_001	22.0326
chr10	3365000	3370000	chr10_001	15.1368
chr10	3370000	3375000	chr10_001	7.65147
chr10	3260000	3265000	chr10_001	7.62215
chr10	3290000	3295000	chr10_001	35.1922
chr10	3305000	3310000	chr10_001	16.9577
chr10	3325000	3330000	chr10_001	15.9739
chr10	3340000	3345000	chr10_001	15.671
chr10	3355000	3360000	chr10_001	17.0261
chr10	3275000	3280000	chr10_001	61.3779
chr10	5145000	5150000	chr10_002	7.79479
chr10	5150000	5155000	chr10_002	28.0293
chr10	5155000	5160000	chr10_002	32.4039
chr10	5165000	5170000	chr10_002	34.2801
chr10	5170000	5175000	chr10_002	25.3681
chr10	5180000	5185000	chr10_002	23.1922
chr10	5185000	5190000	chr10_002	17.6906
chr10	5195000	5200000	chr10_002	23.7883
chr10	5160000	5165000	chr10_002	36.5212
chr10	5175000	5180000	chr10_002	23.8111
chr10	5190000	5195000	chr10_002	23.0684
chr10	7865000	7870000	chr10_003	11.241
chr10	7870000	7875000	chr10_003	12.6417
chr10	7875000	7880000	chr10_003	14.6808
chr10	7885000	7890000	chr10_003	12.0945
chr10	7890000	7895000	chr10_003	12.8339
chr10	7900000	7905000	chr10_003	12.0977
chr10	7905000	7910000	chr10_003	12.9349
chr10	7915000	7920000	chr10_003	11.6775
chr10	7920000	7925000	chr10_003	12.1987
chr10	7930000	7935000	chr10_003	12.5342
chr10	7935000	7940000	chr10_003	14.8241
chr10	7940000	7945000	chr10_003	12.5896
chr10	7880000	7885000	chr10_003	14.316
chr10	7895000	7900000	chr10_003	13.2313
chr10	7910000	7915000	chr10_003	11.798
chr10	7925000	7930000	chr10_003	13.8534
chr10	7945000	7950000	chr10_003	13.9837
chr10	7955000	7960000	chr10_004	9.53746
chr10	7965000	7970000	chr10_004	13.8306
chr10	7970000	7975000	chr10_004	14.0326
chr10	7980000	7985000	chr10_004	15.1173
chr10	7985000	7990000	chr10_004	17.0033
chr10	7990000	7995000	chr10_004	15.8664
chr10	8000000	8005000	chr10_004	16.2866
chr10	8005000	8010000	chr10_004	16.4267
chr10	8015000	8020000	chr10_004	28.9642
chr10	8020000	8025000	chr10_004	24
chr10	7960000	7965000	chr10_004	13.9088
chr10	7975000	7980000	chr10_004	15.9479
chr10	8010000	8015000	chr10_004	14.4495
chr10	7995000	8000000	chr10_004	14.9609
chr10	8045000	8050000	chr10_005	13.2638
chr10	8050000	8055000	chr10_005	18.6482
chr10	8055000	8060000	chr10_005	14.5668
chr10	8040000	8045000	chr10_005	13.4853
chr10	8215000	8220000	chr10_006	47.7915
chr10	8225000	8230000	chr10_006	26.4235
chr10	8230000	8235000	chr10_006	27.1042
chr10	8235000	8240000	chr10_006	23.5831
chr10	8245000	8250000	chr10_006	23.5603
chr10	8250000	8255000	chr10_006	29.4528
chr10	8260000	8265000	chr10_006	27.8371
chr10	8265000	8270000	chr10_006	29.0391
chr10	8275000	8280000	chr10_006	29.8046
chr10	8280000	8285000	chr10_006	32.0391
chr10	8285000	8290000	chr10_006	27.2834
chr10	8295000	8300000	chr10_006	27.5114
chr10	8300000	8305000	chr10_006	28.3453
chr10	8310000	8315000	chr10_006	15.0065
chr10	8315000	8320000	chr10_006	21.329
chr10	8325000	8330000	chr10_006	22.5765
chr10	8330000	8335000	chr10_006	20.8046
chr10	8340000	8345000	chr10_006	21.2866
chr10	8345000	8350000	chr10_006	23.9218
chr10	8350000	8355000	chr10_006	21.6743
chr10	8360000	8365000	chr10_006	19.3811
chr10	8365000	8370000	chr10_006	21.2801
chr10	8375000	8380000	chr10_006	21.4951
chr10	8380000	8385000	chr10_006	21.0847
chr10	8390000	8395000	chr10_006	43.4137
chr10	8395000	8400000	chr10_006	42.2704
chr10	8405000	8410000	chr10_006	42.0423
chr10	8410000	8415000	chr10_006	31.4332
chr10	8415000	8420000	chr10_006	11.1596
chr10	8220000	8225000	chr10_006	32.5668
chr10	8240000	8245000	chr10_006	18.3779
chr10	8270000	8275000	chr10_006	29.1726
chr10	8290000	8295000	chr10_006	24.7036
chr10	8305000	8310000	chr10_006	25.3355
chr10	8320000	8325000	chr10_006	23.5081
chr10	8335000	8340000	chr10_006	24.7394
chr10	8355000	8360000	chr10_006	21.3192
chr10	8370000	8375000	chr10_006	23.7655
chr10	8400000	8405000	chr10_006	37.6743
chr10	8255000	8260000	chr10_006	25.4723
chr10	8385000	8390000	chr10_006	26.9967
chr10	8440000	8445000	chr10_007	38.2248
chr10	8445000	8450000	chr10_007	38.7915
chr10	8455000	8460000	chr10_007	39.1401
chr10	8460000	8465000	chr10_007	44.5896
chr10	8465000	8470000	chr10_007	46.9055
chr10	8475000	8480000	chr10_007	7.06515
chr10	8480000	8485000	chr10_007	18.8339
chr10	8490000	8495000	chr10_007	35.1857
chr10	8495000	8500000	chr10_007	22.0554
chr10	8505000	8510000	chr10_007	21.3322
chr10	8510000	8515000	chr10_007	21.4723
chr10	8435000	8440000	chr10_007	26.4593
chr10	8450000	8455000	chr10_007	39.241
chr10	8470000	8475000	chr10_007	13.215
chr10	8485000	8490000	chr10_007	33.5016
chr10	8500000	8505000	chr10_007	21.8664
chr10	8515000	8520000	chr10_007	15.6221
chr10	8635000	8640000	chr10_008	10.4658
chr10	8640000	8645000	chr10_008	13.3518
chr10	8645000	8650000	chr10_008	12.1759
chr10	8655000	8660000	chr10_008	16.5831
chr10	8660000	8665000	chr10_008	17.3322
chr10	8670000	8675000	chr10_008	16.7166
chr10	8675000	8680000	chr10_008	17.4365
chr10	8685000	8690000	chr10_008	15.9805
chr10	8690000	8695000	chr10_008	16.1596
chr10	8700000	8705000	chr10_008	15.0163
chr10	8705000	8710000	chr10_008	15.1661
chr10	8710000	8715000	chr10_008	16.0586
chr10	8720000	8725000	chr10_008	14.9023
chr10	8725000	8730000	chr10_008	13.0358
chr10	8735000	8740000	chr10_008	8.17264
chr10	8740000	8745000	chr10_008	8.38111
chr10	8665000	8670000	chr10_008	16.1466
chr10	8680000	8685000	chr10_008	19.6091
chr10	8695000	8700000	chr10_008	15.8762
chr10	8715000	8720000	chr10_008	15.1401
chr10	8730000	8735000	chr10_008	7.79805
chr10	8745000	8750000	chr10_008	7.83062
chr10	8650000	8655000	chr10_008	12.2248
chr10	8755000	8760000	chr10_009	9.29642
chr10	8760000	8765000	chr10_009	22.6352
chr10	8770000	8775000	chr10_009	21.8632
chr10	8775000	8780000	chr10_009	21.7948
chr10	8785000	8790000	chr10_009	11.4169
chr10	8790000	8795000	chr10_009	12.7915
chr10	8800000	8805000	chr10_009	12.1922
chr10	8805000	8810000	chr10_009	11.4691
chr10	8815000	8820000	chr10_009	26.2476
chr10	8820000	8825000	chr10_009	26.8502
chr10	8825000	8830000	chr10_009	26.3518
chr10	8835000	8840000	chr10_009	27.1303
chr10	8840000	8845000	chr10_009	28.1303
chr10	8850000	8855000	chr10_009	26.4723
chr10	8855000	8860000	chr10_009	29.4332
chr10	8865000	8870000	chr10_009	25.7492
chr10	8870000	8875000	chr10_009	25.6352
chr10	8875000	8880000	chr10_009	27.8762
chr10	8885000	8890000	chr10_009	12.3811
chr10	8890000	8895000	chr10_009	11.3388
chr10	8900000	8905000	chr10_009	12.2801
chr10	8905000	8910000	chr10_009	10.3583
chr10	8765000	8770000	chr10_009	24.3616
chr10	8795000	8800000	chr10_009	11.7622
chr10	8810000	8815000	chr10_009	19.0912
chr10	8830000	8835000	chr10_009	26.1954
chr10	8845000	8850000	chr10_009	29.3909
chr10	8860000	8865000	chr10_009	25.899
chr10	8880000	8885000	chr10_009	19.3779
chr10	8895000	8900000	chr10_009	12.6515
chr10	8780000	8785000	chr10_009	18.7394
chr10	8910000	8915000	chr10_009	11.7655
chr10	9200000	9205000	chr10_010	8.67752
chr10	9210000	9215000	chr10_010	9.10423
chr10	9215000	9220000	chr10_010	8.80456
chr10	9225000	9230000	chr10_010	8.28664
chr10	9230000	9235000	chr10_010	7.74919
chr10	9235000	9240000	chr10_010	8.14332
chr10	9205000	9210000	chr10_010	8.4202
chr10	9220000	9225000	chr10_010	9.02932
chr10	9430000	9435000	chr10_011	9.42345
chr10	9440000	9445000	chr10_011	11.2508
chr10	9445000	9450000	chr10_011	9.99674
chr10	9455000	9460000	chr10_011	10.7362
chr10	9460000	9465000	chr10_011	10.5896
chr10	9470000	9475000	chr10_011	10.6678
chr10	9475000	9480000	chr10_011	10.2573
chr10	9480000	9485000	chr10_011	9.77199
chr10	9490000	9495000	chr10_011	10.6156
chr10	9495000	9500000	chr10_011	10.0749
chr10	9505000	9510000	chr10_011	10.1466
chr10	9510000	9515000	chr10_011	10.5635
chr10	9520000	9525000	chr10_011	9.74593
chr10	9525000	9530000	chr10_011	9.07166
chr10	9530000	9535000	chr10_011	9.72638
chr10	9540000	9545000	chr10_011	9.9544
chr10	9545000	9550000	chr10_011	11.0423
chr10	9555000	9560000	chr10_011	12.9935
chr10	9560000	9565000	chr10_011	10.6026
chr10	9570000	9575000	chr10_011	11.2215
chr10	9575000	9580000	chr10_011	10.6254
chr10	9585000	9590000	chr10_011	10.0977
chr10	9590000	9595000	chr10_011	9.83062
chr10	9595000	9600000	chr10_011	9.39414
chr10	9605000	9610000	chr10_011	10.1531
chr10	9610000	9615000	chr10_011	10.6938
chr10	9620000	9625000	chr10_011	10.316
chr10	9625000	9630000	chr10_011	7.06515
chr10	9635000	9640000	chr10_011	10.1368
chr10	9640000	9645000	chr10_011	10.0033
chr10	9450000	9455000	chr10_011	11.0326
chr10	9465000	9470000	chr10_011	10.6612
chr10	9485000	9490000	chr10_011	10.2801
chr10	9500000	9505000	chr10_011	9.61238
chr10	9515000	9520000	chr10_011	9.37134
chr10	9535000	9540000	chr10_011	10.7134
chr10	9550000	9555000	chr10_011	11.8306
chr10	9580000	9585000	chr10_011	10.3616
chr10	9600000	9605000	chr10_011	9.96743
chr10	9615000	9620000	chr10_011	10.4528
chr10	9630000	9635000	chr10_011	11.3127
chr10	9565000	9570000	chr10_011	8.73616
chr10	9435000	9440000	chr10_011	10.2671
chr10	10505000	10510000	chr10_012	17.0326
chr10	10510000	10515000	chr10_012	19.6775
chr10	10520000	10525000	chr10_012	18.9121
chr10	10525000	10530000	chr10_012	23.3648
chr10	10535000	10540000	chr10_012	16.6775
chr10	10540000	10545000	chr10_012	14.8469
chr10	10545000	10550000	chr10_012	13.8013
chr10	10555000	10560000	chr10_012	16.7231
chr10	10560000	10565000	chr10_012	17.0749
chr10	10570000	10575000	chr10_012	15.9967
chr10	10575000	10580000	chr10_012	17.2541
chr10	10585000	10590000	chr10_012	35.355
chr10	10590000	10595000	chr10_012	36.5668
chr10	10595000	10600000	chr10_012	25.7296
chr10	10605000	10610000	chr10_012	33.1694
chr10	10610000	10615000	chr10_012	32.3583
chr10	10620000	10625000	chr10_012	28.8404
chr10	10625000	10630000	chr10_012	32.4984
chr10	10635000	10640000	chr10_012	34.5765
chr10	10640000	10645000	chr10_012	31.3876
chr10	10650000	10655000	chr10_012	20.1401
chr10	10655000	10660000	chr10_012	16.6189
chr10	10660000	10665000	chr10_012	18.9805
chr10	10670000	10675000	chr10_012	15.0977
chr10	10675000	10680000	chr10_012	14.1042
chr10	10685000	10690000	chr10_012	18.3844
chr10	10690000	10695000	chr10_012	13.3518
chr10	10515000	10520000	chr10_012	22.0619
chr10	10530000	10535000	chr10_012	20.6906
chr10	10550000	10555000	chr10_012	16.3779
chr10	10565000	10570000	chr10_012	16.0717
chr10	10580000	10585000	chr10_012	36.2215
chr10	10600000	10605000	chr10_012	30.43
chr10	10630000	10635000	chr10_012	32.342
chr10	10645000	10650000	chr10_012	29.1954
chr10	10665000	10670000	chr10_012	16.2997
chr10	10680000	10685000	chr10_012	15.5603
chr10	10615000	10620000	chr10_012	29.1759
chr10	10700000	10705000	chr10_013	15.658
chr10	10705000	10710000	chr10_013	14.2541
chr10	10710000	10715000	chr10_013	14.4463
chr10	10720000	10725000	chr10_013	37.9316
chr10	10725000	10730000	chr10_013	40.8567
chr10	10735000	10740000	chr10_013	25.7101
chr10	10740000	10745000	chr10_013	37.557
chr10	10750000	10755000	chr10_013	36.3518
chr10	10755000	10760000	chr10_013	36.4691
chr10	10765000	10770000	chr10_013	47.6287
chr10	10770000	10775000	chr10_013	43.0586
chr10	10775000	10780000	chr10_013	35.3844
chr10	10785000	10790000	chr10_013	36.9739
chr10	10790000	10795000	chr10_013	35.7948
chr10	10800000	10805000	chr10_013	42.1205
chr10	10805000	10810000	chr10_013	47.3909
chr10	10815000	10820000	chr10_013	44.5505
chr10	10820000	10825000	chr10_013	48.1889
chr10	10830000	10835000	chr10_013	33.0684
chr10	10835000	10840000	chr10_013	35.6906
chr10	10840000	10845000	chr10_013	27.6482
chr10	10850000	10855000	chr10_013	15.8111
chr10	10855000	10860000	chr10_013	15.5309
chr10	10865000	10870000	chr10_013	14.8762
chr10	10870000	10875000	chr10_013	15.4104
chr10	10880000	10885000	chr10_013	13.7687
chr10	10885000	10890000	chr10_013	14.5668
chr10	10890000	10895000	chr10_013	15.2541
chr10	10900000	10905000	chr10_013	13.9446
chr10	10905000	10910000	chr10_013	14.8274
chr10	10915000	10920000	chr10_013	18.9577
chr10	10920000	10925000	chr10_013	28.4202
chr10	10930000	10935000	chr10_013	28.6938
chr10	10935000	10940000	chr10_013	29.1368
chr10	10945000	10950000	chr10_013	27.1987
chr10	10950000	10955000	chr10_013	32.0456
chr10	10955000	10960000	chr10_013	26.8111
chr10	10965000	10970000	chr10_013	17.798
chr10	10970000	10975000	chr10_013	11.6156
chr10	10980000	10985000	chr10_013	24.7394
chr10	10985000	10990000	chr10_013	30.0358
chr10	10995000	11000000	chr10_013	37.6059
chr10	11000000	11005000	chr10_013	20.5668
chr10	10715000	10720000	chr10_013	14.9544
chr10	10730000	10735000	chr10_013	29.9935
chr10	10760000	10765000	chr10_013	47.3713
chr10	10780000	10785000	chr10_013	34.3225
chr10	10795000	10800000	chr10_013	33.9349
chr10	10810000	10815000	chr10_013	39.6189
chr10	10825000	10830000	chr10_013	37.1336
chr10	10845000	10850000	chr10_013	16.1466
chr10	10860000	10865000	chr10_013	17.8371
chr10	10895000	10900000	chr10_013	14.2573
chr10	10910000	10915000	chr10_013	14.6808
chr10	10925000	10930000	chr10_013	29.0423
chr10	10940000	10945000	chr10_013	24.3746
chr10	10960000	10965000	chr10_013	27.3909
chr10	10975000	10980000	chr10_013	14.9511
chr10	10990000	10995000	chr10_013	30.4658
chr10	10745000	10750000	chr10_013	37.4658
chr10	10875000	10880000	chr10_013	16.899
chr10	12115000	12120000	chr10_014	9.49837
chr10	12125000	12130000	chr10_014	18.8958
chr10	12130000	12135000	chr10_014	18.2313
chr10	12135000	12140000	chr10_014	17.4723
chr10	12145000	12150000	chr10_014	20.2769
chr10	12150000	12155000	chr10_014	17.6547
chr10	12160000	12165000	chr10_014	19.1889
chr10	12165000	12170000	chr10_014	15.1922
chr10	12175000	12180000	chr10_014	15.0554
chr10	12180000	12185000	chr10_014	15.6906
chr10	12190000	12195000	chr10_014	17.671
chr10	12195000	12200000	chr10_014	16.2215
chr10	12200000	12205000	chr10_014	16.3941
chr10	12210000	12215000	chr10_014	17.1368
chr10	12215000	12220000	chr10_014	21.2671
chr10	12225000	12230000	chr10_014	16.0651
chr10	12230000	12235000	chr10_014	18.2866
chr10	12240000	12245000	chr10_014	16.8502
chr10	12245000	12250000	chr10_014	16.0293
chr10	12250000	12255000	chr10_014	16.7557
chr10	12260000	12265000	chr10_014	15.1759
chr10	12265000	12270000	chr10_014	17.0554
chr10	12275000	12280000	chr10_014	14.0684
chr10	12280000	12285000	chr10_014	17.6352
chr10	12120000	12125000	chr10_014	19.2443
chr10	12140000	12145000	chr10_014	16.557
chr10	12155000	12160000	chr10_014	18.2117
chr10	12170000	12175000	chr10_014	21.1238
chr10	12205000	12210000	chr10_014	17.2182
chr10	12220000	12225000	chr10_014	18.5993
chr10	12235000	12240000	chr10_014	17.0456
chr10	12255000	12260000	chr10_014	14.4723
chr10	12270000	12275000	chr10_014	17.3844
chr10	12285000	12290000	chr10_014	17.6156
chr10	12185000	12190000	chr10_014	17.671
chr10	12470000	12475000	chr10_015	27.9023
chr10	12475000	12480000	chr10_015	22.1466
chr10	12485000	12490000	chr10_015	17.2769
chr10	12490000	12495000	chr10_015	16.3713
chr10	12495000	12500000	chr10_015	18.0847
chr10	12505000	12510000	chr10_015	17.3713
chr10	12510000	12515000	chr10_015	19.4528
chr10	12520000	12525000	chr10_015	20.645
chr10	12525000	12530000	chr10_015	20.2476
chr10	12535000	12540000	chr10_015	17.5831
chr10	12540000	12545000	chr10_015	21.4007
chr10	12545000	12550000	chr10_015	20.3681
chr10	12555000	12560000	chr10_015	14.6417
chr10	12560000	12565000	chr10_015	8.79479
chr10	12465000	12470000	chr10_015	10.4137
chr10	12480000	12485000	chr10_015	17.8567
chr10	12500000	12505000	chr10_015	18.0163
chr10	12515000	12520000	chr10_015	20.2573
chr10	12530000	12535000	chr10_015	21.1205
chr10	12550000	12555000	chr10_015	21.4463
chr10	12565000	12570000	chr10_015	8.66124
chr12	55380000	55385000	chr12_001	27.2736
chr12	55385000	55390000	chr12_001	38.329
chr12	55395000	55400000	chr12_001	43.1726
chr12	55400000	55405000	chr12_001	14.8111
chr12	55390000	55395000	chr12_001	47.4495
chr12	55740000	55745000	chr12_002	16.6254
chr12	55745000	55750000	chr12_002	40.5668
chr12	55735000	55740000	chr12_002	13.5472
chr12	58005000	58010000	chr12_003	101.951
chr12	58010000	58015000	chr12_003	133.384
chr12	58020000	58025000	chr12_003	117.349
chr12	58025000	58030000	chr12_003	79.6156
chr12	58015000	58020000	chr12_003	138.596
chr12	58030000	58035000	chr12_003	50.2052
chr12	58050000	58055000	chr12_004	40.0619
chr12	58055000	58060000	chr12_004	39.1401
chr12	58065000	58070000	chr12_004	23.1107
chr12	58070000	58075000	chr12_004	18.0228
chr12	58075000	58080000	chr12_004	18.4691
chr12	58085000	58090000	chr12_004	24.2638
chr12	58090000	58095000	chr12_004	24.9023
chr12	58100000	58105000	chr12_004	18.8925
chr12	58105000	58110000	chr12_004	22.1303
chr12	58115000	58120000	chr12_004	31.7948
chr12	58120000	58125000	chr12_004	56.7134
chr12	58125000	58130000	chr12_004	75.7818
chr12	58135000	58140000	chr12_004	70.0912
chr12	58140000	58145000	chr12_004	48.2182
chr12	58150000	58155000	chr12_004	101.987
chr12	58155000	58160000	chr12_004	101.58
chr12	58080000	58085000	chr12_004	18.9316
chr12	58095000	58100000	chr12_004	18.4625
chr12	58110000	58115000	chr12_004	32.8795
chr12	58130000	58135000	chr12_004	84.3974
chr12	58145000	58150000	chr12_004	75.2801
chr12	58160000	58165000	chr12_004	76.8078
chr12	58060000	58065000	chr12_004	21.57
chr12	58540000	58545000	chr12_005	29.3583
chr12	58920000	58925000	chr12_006	17.5081
chr12	58925000	58930000	chr12_006	35.0261
chr12	58930000	58935000	chr12_006	44.772
chr12	60540000	60545000	chr12_007	74.9609
chr12	60545000	60550000	chr12_007	58.1498
chr12	60550000	60555000	chr12_007	19.5798
chr12	65025000	65030000	chr12_008	36.8013
chr12	65865000	65870000	chr12_009	37.5081
chr12	65870000	65875000	chr12_009	40.9218
chr12	65875000	65880000	chr12_009	45.0391
chr12	65885000	65890000	chr12_009	44.114
chr12	65890000	65895000	chr12_009	58.3225
chr12	65900000	65905000	chr12_009	82.43
chr12	65905000	65910000	chr12_009	92.8274
chr12	65915000	65920000	chr12_009	45.8371
chr12	65920000	65925000	chr12_009	45.9739
chr12	65930000	65935000	chr12_009	40.7524
chr12	65935000	65940000	chr12_009	41.8827
chr12	65940000	65945000	chr12_009	32.9218
chr12	65950000	65955000	chr12_009	22.0586
chr12	65955000	65960000	chr12_009	26.2378
chr12	65965000	65970000	chr12_009	22.9023
chr12	65970000	65975000	chr12_009	23.8013
chr12	65980000	65985000	chr12_009	26.4625
chr12	65985000	65990000	chr12_009	24.3616
chr12	65995000	66000000	chr12_009	23.1824
chr12	66000000	66005000	chr12_009	15.4039
chr12	66005000	66010000	chr12_009	35.5309
chr12	66015000	66020000	chr12_009	40.4723
chr12	66020000	66025000	chr12_009	43.4723
chr12	66030000	66035000	chr12_009	27.4691
chr12	66035000	66040000	chr12_009	24.1661
chr12	66045000	66050000	chr12_009	36.7622
chr12	66050000	66055000	chr12_009	53.4821
chr12	66055000	66060000	chr12_009	43.7915
chr12	66065000	66070000	chr12_009	7.30619
chr12	65860000	65865000	chr12_009	19.43
chr12	65880000	65885000	chr12_009	40.3713
chr12	65895000	65900000	chr12_009	74.1564
chr12	65910000	65915000	chr12_009	77.0423
chr12	65945000	65950000	chr12_009	26.2248
chr12	65960000	65965000	chr12_009	24.8371
chr12	65975000	65980000	chr12_009	24.7134
chr12	65990000	65995000	chr12_009	25.2215
chr12	66010000	66015000	chr12_009	39.3094
chr12	66025000	66030000	chr12_009	34.5765
chr12	66040000	66045000	chr12_009	36.9837
chr12	65925000	65930000	chr12_009	51.9023
chr12	66060000	66065000	chr12_009	43.8664
chr12	66210000	66215000	chr12_010	17.6319
chr12	66215000	66220000	chr12_010	23.0065
chr12	66225000	66230000	chr12_010	15.4625
chr12	66230000	66235000	chr12_010	16.7459
chr12	66235000	66240000	chr12_010	16.8371
chr12	66245000	66250000	chr12_010	14.4039
chr12	66205000	66210000	chr12_010	13.8339
chr12	66220000	66225000	chr12_010	15.2476
chr12	66240000	66245000	chr12_010	16.2182
chr12	66505000	66510000	chr12_011	13.4072
chr12	66510000	66515000	chr12_011	12.8469
chr12	66520000	66525000	chr12_011	14.9186
chr12	66525000	66530000	chr12_011	10.4984
chr12	66530000	66535000	chr12_011	12.3583
chr12	66540000	66545000	chr12_011	12.6906
chr12	66545000	66550000	chr12_011	12.0521
chr12	66555000	66560000	chr12_011	13.886
chr12	66560000	66565000	chr12_011	15.3876
chr12	66570000	66575000	chr12_011	13.8013
chr12	66515000	66520000	chr12_011	13.5147
chr12	66535000	66540000	chr12_011	12.8436
chr12	66550000	66555000	chr12_011	15.6873
chr12	66565000	66570000	chr12_011	16.1889
chr12	67060000	67065000	chr12_012	27.0293
chr12	67860000	67865000	chr12_013	22.5342
chr12	69075000	69080000	chr12_014	34.7655
chr12	69080000	69085000	chr12_014	76.1987
chr12	69085000	69090000	chr12_014	87.1433
chr12	69095000	69100000	chr12_014	33.6678
chr12	69100000	69105000	chr12_014	24.9902
chr12	69110000	69115000	chr12_014	40.8208
chr12	69115000	69120000	chr12_014	38.2932
chr12	69125000	69130000	chr12_014	40.9121
chr12	69130000	69135000	chr12_014	47.3779
chr12	69135000	69140000	chr12_014	65.202
chr12	69145000	69150000	chr12_014	79.6645
chr12	69150000	69155000	chr12_014	68.5603
chr12	69160000	69165000	chr12_014	93.2932
chr12	69165000	69170000	chr12_014	95.8697
chr12	69175000	69180000	chr12_014	95.9479
chr12	69180000	69185000	chr12_014	89.57
chr12	69190000	69195000	chr12_014	100.134
chr12	69195000	69200000	chr12_014	110.355
chr12	69200000	69205000	chr12_014	95.8925
chr12	69210000	69215000	chr12_014	73.2671
chr12	69215000	69220000	chr12_014	91.1401
chr12	69225000	69230000	chr12_014	85.645
chr12	69230000	69235000	chr12_014	92.114
chr12	69240000	69245000	chr12_014	101.814
chr12	69245000	69250000	chr12_014	122.941
chr12	69250000	69255000	chr12_014	105.515
chr12	69260000	69265000	chr12_014	123.919
chr12	69265000	69270000	chr12_014	104.44
chr12	69275000	69280000	chr12_014	128.72
chr12	69280000	69285000	chr12_014	127.674
chr12	69290000	69295000	chr12_014	99.0651
chr12	69295000	69300000	chr12_014	111.055
chr12	69305000	69310000	chr12_014	89.2215
chr12	69310000	69315000	chr12_014	77.5244
chr12	69315000	69320000	chr12_014	65.5147
chr12	69325000	69330000	chr12_014	117.137
chr12	69330000	69335000	chr12_014	66.2508
chr12	69340000	69345000	chr12_014	65.1433
chr12	69345000	69350000	chr12_014	102.752
chr12	69355000	69360000	chr12_014	88.658
chr12	69360000	69365000	chr12_014	80.3941
chr12	69370000	69375000	chr12_014	96.2313
chr12	69375000	69380000	chr12_014	110.671
chr12	69380000	69385000	chr12_014	117.01
chr12	69390000	69395000	chr12_014	105.899
chr12	69395000	69400000	chr12_014	103.466
chr12	69405000	69410000	chr12_014	88.2638
chr12	69410000	69415000	chr12_014	83.1661
chr12	69420000	69425000	chr12_014	111.27
chr12	69425000	69430000	chr12_014	94.241
chr12	69430000	69435000	chr12_014	114.303
chr12	69440000	69445000	chr12_014	90.0033
chr12	69445000	69450000	chr12_014	80.5668
chr12	69455000	69460000	chr12_014	49.7492
chr12	69460000	69465000	chr12_014	64.241
chr12	69470000	69475000	chr12_014	70.0326
chr12	69475000	69480000	chr12_014	54.6645
chr12	69090000	69095000	chr12_014	64.8697
chr12	69105000	69110000	chr12_014	23.2248
chr12	69120000	69125000	chr12_014	41.0749
chr12	69140000	69145000	chr12_014	74.355
chr12	69155000	69160000	chr12_014	83.9967
chr12	69170000	69175000	chr12_014	105.072
chr12	69185000	69190000	chr12_014	99.4137
chr12	69220000	69225000	chr12_014	92.3876
chr12	69235000	69240000	chr12_014	91.9316
chr12	69255000	69260000	chr12_014	132.863
chr12	69270000	69275000	chr12_014	103.472
chr12	69285000	69290000	chr12_014	139.498
chr12	69300000	69305000	chr12_014	93.4202
chr12	69320000	69325000	chr12_014	68.8827
chr12	69350000	69355000	chr12_014	86.43
chr12	69365000	69370000	chr12_014	78.3648
chr12	69385000	69390000	chr12_014	73.0521
chr12	69400000	69405000	chr12_014	97.3355
chr12	69415000	69420000	chr12_014	108.241
chr12	69435000	69440000	chr12_014	82.5179
chr12	69450000	69455000	chr12_014	51.3062
chr12	69480000	69485000	chr12_014	57.1889
chr12	69335000	69340000	chr12_014	73.0684
chr12	69465000	69470000	chr12_014	65.0912
chr12	69205000	69210000	chr12_014	79.5668
chr12	69505000	69510000	chr12_015	29.4007
chr12	69510000	69515000	chr12_015	61.5472
chr12	69520000	69525000	chr12_015	48.2769
chr12	69525000	69530000	chr12_015	50.684
chr12	69535000	69540000	chr12_015	42.4267
chr12	69540000	69545000	chr12_015	51.6775
chr12	69545000	69550000	chr12_015	34.3811
chr12	69555000	69560000	chr12_015	25.6873
chr12	69560000	69565000	chr12_015	26.1759
chr12	69570000	69575000	chr12_015	25.3355
chr12	69575000	69580000	chr12_015	26.1075
chr12	69585000	69590000	chr12_015	21.9935
chr12	69590000	69595000	chr12_015	24.1596
chr12	69600000	69605000	chr12_015	24.2345
chr12	69605000	69610000	chr12_015	26.6189
chr12	69610000	69615000	chr12_015	21.3746
chr12	69620000	69625000	chr12_015	17.9674
chr12	69625000	69630000	chr12_015	20.4821
chr12	69635000	69640000	chr12_015	20.7557
chr12	69640000	69645000	chr12_015	19.2997
chr12	69650000	69655000	chr12_015	19.8274
chr12	69655000	69660000	chr12_015	27.9381
chr12	69665000	69670000	chr12_015	34.3941
chr12	69670000	69675000	chr12_015	40.1173
chr12	69675000	69680000	chr12_015	31.9511
chr12	69685000	69690000	chr12_015	36.1498
chr12	69690000	69695000	chr12_015	42.6808
chr12	69700000	69705000	chr12_015	27.3094
chr12	69705000	69710000	chr12_015	41.4365
chr12	69715000	69720000	chr12_015	43.6026
chr12	69720000	69725000	chr12_015	38.4528
chr12	69725000	69730000	chr12_015	42.8241
chr12	69735000	69740000	chr12_015	46.6906
chr12	69740000	69745000	chr12_015	37.899
chr12	69750000	69755000	chr12_015	46.4821
chr12	69755000	69760000	chr12_015	34.6059
chr12	69765000	69770000	chr12_015	40.0879
chr12	69770000	69775000	chr12_015	39.0098
chr12	69780000	69785000	chr12_015	12.4495
chr12	69785000	69790000	chr12_015	18.1792
chr12	69790000	69795000	chr12_015	17.2997
chr12	69800000	69805000	chr12_015	13.2671
chr12	69805000	69810000	chr12_015	16.6938
chr12	69815000	69820000	chr12_015	15.7459
chr12	69820000	69825000	chr12_015	13.1922
chr12	69830000	69835000	chr12_015	14.8958
chr12	69835000	69840000	chr12_015	16.1922
chr12	69845000	69850000	chr12_015	11.8436
chr12	69850000	69855000	chr12_015	12.9218
chr12	69855000	69860000	chr12_015	11.3518
chr12	69865000	69870000	chr12_015	12.6221
chr12	69870000	69875000	chr12_015	11.241
chr12	69880000	69885000	chr12_015	13.0945
chr12	69885000	69890000	chr12_015	12.7427
chr12	69895000	69900000	chr12_015	13.2769
chr12	69900000	69905000	chr12_015	11.9642
chr12	69905000	69910000	chr12_015	11.2769
chr12	69915000	69920000	chr12_015	13.4463
chr12	69920000	69925000	chr12_015	12.7199
chr12	69930000	69935000	chr12_015	11.2997
chr12	69935000	69940000	chr12_015	11.5407
chr12	69945000	69950000	chr12_015	12.5309
chr12	69950000	69955000	chr12_015	11.8893
chr12	69960000	69965000	chr12_015	12.6775
chr12	69965000	69970000	chr12_015	13.1173
chr12	69970000	69975000	chr12_015	12.2997
chr12	69980000	69985000	chr12_015	13.0195
chr12	69985000	69990000	chr12_015	12.7068
chr12	69995000	70000000	chr12_015	12.4723
chr12	70000000	70005000	chr12_015	15.8534
chr12	70010000	70015000	chr12_015	17.8925
chr12	70015000	70020000	chr12_015	18.0619
chr12	70020000	70025000	chr12_015	18.1466
chr12	70030000	70035000	chr12_015	17.5831
chr12	70035000	70040000	chr12_015	18.1889
chr12	70045000	70050000	chr12_015	18.5896
chr12	70050000	70055000	chr12_015	20.2052
chr12	70060000	70065000	chr12_015	20.658
chr12	70065000	70070000	chr12_015	19.7036
chr12	70075000	70080000	chr12_015	19.2638
chr12	70080000	70085000	chr12_015	19.7883
chr12	70085000	70090000	chr12_015	17.1205
chr12	70095000	70100000	chr12_015	18.0098
chr12	70100000	70105000	chr12_015	16.987
chr12	70110000	70115000	chr12_015	17.4691
chr12	70115000	70120000	chr12_015	16.987
chr12	70125000	70130000	chr12_015	17.0326
chr12	70130000	70135000	chr12_015	20.2638
chr12	70140000	70145000	chr12_015	16.5798
chr12	70145000	70150000	chr12_015	15.9381
chr12	70150000	70155000	chr12_015	15.3713
chr12	70160000	70165000	chr12_015	18.7036
chr12	70165000	70170000	chr12_015	7.78502
chr12	70175000	70180000	chr12_015	16.2117
chr12	70180000	70185000	chr12_015	16.2704
chr12	70190000	70195000	chr12_015	13.3388
chr12	70195000	70200000	chr12_015	13.544
chr12	70200000	70205000	chr12_015	17.3192
chr12	70210000	70215000	chr12_015	17.316
chr12	70215000	70220000	chr12_015	15.5896
chr12	70225000	70230000	chr12_015	18.1629
chr12	70230000	70235000	chr12_015	19.3453
chr12	70240000	70245000	chr12_015	14.5179
chr12	70245000	70250000	chr12_015	17.2769
chr12	70255000	70260000	chr12_015	13.4886
chr12	70260000	70265000	chr12_015	19.5016
chr12	70265000	70270000	chr12_015	16.3257
chr12	70275000	70280000	chr12_015	19.2704
chr12	70280000	70285000	chr12_015	17.3257
chr12	70290000	70295000	chr12_015	19.9805
chr12	70295000	70300000	chr12_015	37.0065
chr12	70305000	70310000	chr12_015	17.3322
chr12	70310000	70315000	chr12_015	17.9837
chr12	70315000	70320000	chr12_015	15.9577
chr12	70325000	70330000	chr12_015	21.2932
chr12	70330000	70335000	chr12_015	13.873
chr12	70340000	70345000	chr12_015	18.2248
chr12	70345000	70350000	chr12_015	17.4658
chr12	69515000	69520000	chr12_015	58.9251
chr12	69530000	69535000	chr12_015	49.886
chr12	69550000	69555000	chr12_015	28.0423
chr12	69565000	69570000	chr12_015	26.4104
chr12	69580000	69585000	chr12_015	19.2248
chr12	69615000	69620000	chr12_015	21.3518
chr12	69630000	69635000	chr12_015	16.0293
chr12	69645000	69650000	chr12_015	20.5407
chr12	69660000	69665000	chr12_015	35.2671
chr12	69680000	69685000	chr12_015	39.0423
chr12	69695000	69700000	chr12_015	34.5993
chr12	69710000	69715000	chr12_015	41.355
chr12	69745000	69750000	chr12_015	37.6678
chr12	69760000	69765000	chr12_015	36.3388
chr12	69775000	69780000	chr12_015	29.241
chr12	69795000	69800000	chr12_015	14.8404
chr12	69810000	69815000	chr12_015	13.4235
chr12	69825000	69830000	chr12_015	14.9479
chr12	69840000	69845000	chr12_015	12.9577
chr12	69875000	69880000	chr12_015	11.9544
chr12	69890000	69895000	chr12_015	11.9674
chr12	69910000	69915000	chr12_015	12.544
chr12	69925000	69930000	chr12_015	11.4984
chr12	69940000	69945000	chr12_015	12.6254
chr12	69955000	69960000	chr12_015	12.0749
chr12	69975000	69980000	chr12_015	15.7427
chr12	70005000	70010000	chr12_015	15.202
chr12	70025000	70030000	chr12_015	16.9218
chr12	70040000	70045000	chr12_015	16.5277
chr12	70055000	70060000	chr12_015	18.0326
chr12	70070000	70075000	chr12_015	18.0163
chr12	70090000	70095000	chr12_015	17.0358
chr12	70105000	70110000	chr12_015	17.8925
chr12	70135000	70140000	chr12_015	15.9805
chr12	70155000	70160000	chr12_015	16.8795
chr12	70170000	70175000	chr12_015	8.31922
chr12	70185000	70190000	chr12_015	16.6026
chr12	70205000	70210000	chr12_015	16.1173
chr12	70220000	70225000	chr12_015	16.2345
chr12	70235000	70240000	chr12_015	18.8241
chr12	70270000	70275000	chr12_015	20.013
chr12	70285000	70290000	chr12_015	17.0261
chr12	70300000	70305000	chr12_015	31.9349
chr12	70320000	70325000	chr12_015	17.9186
chr12	70335000	70340000	chr12_015	7.62541
chr12	70350000	70355000	chr12_015	17.5114
chr12	69595000	69600000	chr12_015	25.241
chr12	69730000	69735000	chr12_015	39.7296
chr12	69860000	69865000	chr12_015	13.1596
chr12	69990000	69995000	chr12_015	12.6515
chr12	70120000	70125000	chr12_015	16.127
chr12	70250000	70255000	chr12_015	14.6808
chr12	70380000	70385000	chr12_016	11.8925
chr12	70390000	70395000	chr12_016	14.3909
chr12	70395000	70400000	chr12_016	25.1596
chr12	70405000	70410000	chr12_016	16.6091
chr12	70410000	70415000	chr12_016	13.2508
chr12	70420000	70425000	chr12_016	28.7003
chr12	70425000	70430000	chr12_016	27.5896
chr12	70435000	70440000	chr12_016	13.7394
chr12	70440000	70445000	chr12_016	13.9283
chr12	70445000	70450000	chr12_016	13.3127
chr12	70455000	70460000	chr12_016	10.7199
chr12	70460000	70465000	chr12_016	10.7362
chr12	70470000	70475000	chr12_016	10.8795
chr12	70475000	70480000	chr12_016	9.91205
chr12	70485000	70490000	chr12_016	11.1759
chr12	70490000	70495000	chr12_016	9.94788
chr12	70495000	70500000	chr12_016	11.1107
chr12	70505000	70510000	chr12_016	10.2866
chr12	70510000	70515000	chr12_016	10.342
chr12	70520000	70525000	chr12_016	9.05863
chr12	70525000	70530000	chr12_016	24.0879
chr12	70535000	70540000	chr12_016	22.5472
chr12	70540000	70545000	chr12_016	23.0977
chr12	70550000	70555000	chr12_016	23.0065
chr12	70555000	70560000	chr12_016	22.5668
chr12	70560000	70565000	chr12_016	23.9577
chr12	70570000	70575000	chr12_016	23.2378
chr12	70575000	70580000	chr12_016	12.2769
chr12	70585000	70590000	chr12_016	10.1857
chr12	70590000	70595000	chr12_016	9.13681
chr12	70600000	70605000	chr12_016	9.90554
chr12	70605000	70610000	chr12_016	10.7915
chr12	70610000	70615000	chr12_016	9.7557
chr12	70620000	70625000	chr12_016	10.8599
chr12	70625000	70630000	chr12_016	8.61889
chr12	70635000	70640000	chr12_016	10.7231
chr12	70640000	70645000	chr12_016	10.0814
chr12	70650000	70655000	chr12_016	9.86971
chr12	70655000	70660000	chr12_016	17.9837
chr12	70665000	70670000	chr12_016	18.0423
chr12	70670000	70675000	chr12_016	18.1433
chr12	70675000	70680000	chr12_016	18.2117
chr12	70685000	70690000	chr12_016	18.7362
chr12	70690000	70695000	chr12_016	18.7622
chr12	70700000	70705000	chr12_016	10.1629
chr12	70705000	70710000	chr12_016	15.2052
chr12	70715000	70720000	chr12_016	10.2378
chr12	70720000	70725000	chr12_016	10.0293
chr12	70730000	70735000	chr12_016	10.127
chr12	70735000	70740000	chr12_016	10.0684
chr12	70740000	70745000	chr12_016	9.2899
chr12	70750000	70755000	chr12_016	10.4853
chr12	70755000	70760000	chr12_016	11.0554
chr12	70765000	70770000	chr12_016	40.5212
chr12	70770000	70775000	chr12_016	40.5928
chr12	70780000	70785000	chr12_016	39.9186
chr12	70785000	70790000	chr12_016	40.7752
chr12	70790000	70795000	chr12_016	50.1173
chr12	70800000	70805000	chr12_016	99.2932
chr12	70805000	70810000	chr12_016	55.8958
chr12	70815000	70820000	chr12_016	56.6384
chr12	70820000	70825000	chr12_016	38.4463
chr12	70830000	70835000	chr12_016	37.5505
chr12	70835000	70840000	chr12_016	43.645
chr12	70845000	70850000	chr12_016	40.4691
chr12	70850000	70855000	chr12_016	40.1596
chr12	70855000	70860000	chr12_016	40.2117
chr12	70865000	70870000	chr12_016	36.355
chr12	70870000	70875000	chr12_016	51.4365
chr12	70880000	70885000	chr12_016	39.2052
chr12	70885000	70890000	chr12_016	38.1792
chr12	70895000	70900000	chr12_016	41.8534
chr12	70900000	70905000	chr12_016	28.1368
chr12	70910000	70915000	chr12_016	27.5831
chr12	70915000	70920000	chr12_016	28.5993
chr12	70920000	70925000	chr12_016	37.645
chr12	70930000	70935000	chr12_016	48.6971
chr12	70935000	70940000	chr12_016	43.2997
chr12	70400000	70405000	chr12_016	31.5147
chr12	70415000	70420000	chr12_016	26.1857
chr12	70430000	70435000	chr12_016	14.127
chr12	70450000	70455000	chr12_016	10.3746
chr12	70465000	70470000	chr12_016	11.2313
chr12	70480000	70485000	chr12_016	10.873
chr12	70500000	70505000	chr12_016	12.3779
chr12	70530000	70535000	chr12_016	25.8893
chr12	70545000	70550000	chr12_016	23.5961
chr12	70565000	70570000	chr12_016	22.8339
chr12	70580000	70585000	chr12_016	10.0456
chr12	70595000	70600000	chr12_016	8.32573
chr12	70615000	70620000	chr12_016	10.1694
chr12	70630000	70635000	chr12_016	10.3127
chr12	70660000	70665000	chr12_016	18.8436
chr12	70680000	70685000	chr12_016	17.9739
chr12	70695000	70700000	chr12_016	10.6384
chr12	70710000	70715000	chr12_016	10.2606
chr12	70725000	70730000	chr12_016	10.1433
chr12	70745000	70750000	chr12_016	10.0879
chr12	70760000	70765000	chr12_016	16.9544
chr12	70795000	70800000	chr12_016	61.1466
chr12	70810000	70815000	chr12_016	53.6352
chr12	70825000	70830000	chr12_016	40.6384
chr12	70840000	70845000	chr12_016	49.5342
chr12	70860000	70865000	chr12_016	42.2117
chr12	70875000	70880000	chr12_016	49.7622
chr12	70890000	70895000	chr12_016	46.7101
chr12	70925000	70930000	chr12_016	51.202
chr12	70940000	70945000	chr12_016	46.5863
chr12	70385000	70390000	chr12_016	13.9577
chr12	70515000	70520000	chr12_016	11.5668
chr12	70645000	70650000	chr12_016	10.2964
chr12	70775000	70780000	chr12_016	37.2932
chr12	70905000	70910000	chr12_016	27.3909
chr12	70970000	70975000	chr12_017	10.8762
chr12	70980000	70985000	chr12_017	14.7557
chr12	70985000	70990000	chr12_017	13.9967
chr12	70995000	71000000	chr12_017	13.5765
chr12	71000000	71005000	chr12_017	14.7752
chr12	71010000	71015000	chr12_017	15.6417
chr12	71015000	71020000	chr12_017	14.0456
chr12	70975000	70980000	chr12_017	13.3616
chr12	70990000	70995000	chr12_017	14.2215
chr12	71005000	71010000	chr12_017	14.8306
chr12	71020000	71025000	chr12_017	9.10749
chr12	71030000	71035000	chr12_018	11.3648
chr12	71035000	71040000	chr12_018	11.6938
chr12	71045000	71050000	chr12_018	11.4397
chr12	71050000	71055000	chr12_018	11.4593
chr12	71060000	71065000	chr12_018	10.4397
chr12	71065000	71070000	chr12_018	10.0586
chr12	71075000	71080000	chr12_018	11.3062
chr12	71080000	71085000	chr12_018	11.2215
chr12	71085000	71090000	chr12_018	10.5635
chr12	71095000	71100000	chr12_018	10.5049
chr12	71100000	71105000	chr12_018	10.5668
chr12	71110000	71115000	chr12_018	10.5244
chr12	71115000	71120000	chr12_018	10.5212
chr12	71125000	71130000	chr12_018	12.3062
chr12	71130000	71135000	chr12_018	11.2866
chr12	71140000	71145000	chr12_018	11.1824
chr12	71145000	71150000	chr12_018	10.6612
chr12	71150000	71155000	chr12_018	11.6254
chr12	71160000	71165000	chr12_018	6.65472
chr12	71165000	71170000	chr12_018	11.5375
chr12	71175000	71180000	chr12_018	12.7557
chr12	71180000	71185000	chr12_018	10.6417
chr12	71190000	71195000	chr12_018	11.1726
chr12	71195000	71200000	chr12_018	10.9609
chr12	71205000	71210000	chr12_018	12.4495
chr12	71210000	71215000	chr12_018	11.7068
chr12	71215000	71220000	chr12_018	14.8827
chr12	71225000	71230000	chr12_018	12.9153
chr12	71230000	71235000	chr12_018	13.9121
chr12	71240000	71245000	chr12_018	6.7557
chr12	71055000	71060000	chr12_018	10.2378
chr12	71070000	71075000	chr12_018	10.443
chr12	71090000	71095000	chr12_018	10.6091
chr12	71105000	71110000	chr12_018	10.4593
chr12	71120000	71125000	chr12_018	10.3681
chr12	71135000	71140000	chr12_018	12.7459
chr12	71155000	71160000	chr12_018	11.1107
chr12	71185000	71190000	chr12_018	10.9186
chr12	71200000	71205000	chr12_018	11.5635
chr12	71220000	71225000	chr12_018	14.1303
chr12	71235000	71240000	chr12_018	12.1107
chr12	71040000	71045000	chr12_018	11.0521
chr12	71170000	71175000	chr12_018	11.0521
chr12	71280000	71285000	chr12_019	7.83062
chr12	71290000	71295000	chr12_019	20.4919
chr12	71285000	71290000	chr12_019	22.8208
chr12	71420000	71425000	chr12_020	12.0977
chr12	71425000	71430000	chr12_020	11.5309
chr12	71435000	71440000	chr12_020	12.241
chr12	71440000	71445000	chr12_020	13.3779
chr12	71445000	71450000	chr12_020	11.0326
chr12	71455000	71460000	chr12_020	25.4951
chr12	71460000	71465000	chr12_020	23.7687
chr12	71470000	71475000	chr12_020	24.6906
chr12	71475000	71480000	chr12_020	20.0521
chr12	71485000	71490000	chr12_020	13.8534
chr12	71490000	71495000	chr12_020	8.42997
chr12	71500000	71505000	chr12_020	52.4007
chr12	71505000	71510000	chr12_020	59.9772
chr12	71510000	71515000	chr12_020	34.6645
chr12	71415000	71420000	chr12_020	12.3388
chr12	71450000	71455000	chr12_020	20.7655
chr12	71465000	71470000	chr12_020	24.3485
chr12	71480000	71485000	chr12_020	13.2899
chr12	71495000	71500000	chr12_020	27.6906
chr12	71430000	71435000	chr12_020	10.215
chr12	71605000	71610000	chr12_021	40.5505
chr12	71615000	71620000	chr12_021	41.5309
chr12	71620000	71625000	chr12_021	42.7883
chr12	71625000	71630000	chr12_021	42.7948
chr12	71635000	71640000	chr12_021	41.1368
chr12	71640000	71645000	chr12_021	39.355
chr12	71610000	71615000	chr12_021	41.5375
chr12	71630000	71635000	chr12_021	45.2769
chr12	71645000	71650000	chr12_021	14.2052
chr12	71685000	71690000	chr12_022	48.5081
chr12	71690000	71695000	chr12_022	58.6384
chr12	71695000	71700000	chr12_022	11.6938
chr12	73360000	73365000	chr12_023	36.8208
chr12	73370000	73375000	chr12_023	75.3681
chr12	73375000	73380000	chr12_023	62.6124
chr12	73365000	73370000	chr12_023	71.671
chr12	73380000	73385000	chr12_023	15.0326
chr12	74225000	74230000	chr12_024	57.2899
chr12	74230000	74235000	chr12_024	68.1661
chr12	74240000	74245000	chr12_024	62.3746
chr12	74245000	74250000	chr12_024	43.9609
chr12	74255000	74260000	chr12_024	34.9837
chr12	74260000	74265000	chr12_024	35.658
chr12	74235000	74240000	chr12_024	64.6156
chr12	74250000	74255000	chr12_024	36.4593
chr12	74265000	74270000	chr12_024	7.81107
chr12	74320000	74325000	chr12_025	52.8111
chr12	74325000	74330000	chr12_025	38.8046
chr12	74335000	74340000	chr12_025	39.1173
chr12	74340000	74345000	chr12_025	26.5342
chr12	74330000	74335000	chr12_025	36.5212
chr12	74315000	74320000	chr12_025	18.5375
chr12	74425000	74430000	chr12_026	7.39088
chr12	74435000	74440000	chr12_026	57.3746
chr12	74440000	74445000	chr12_026	58.3355
chr12	74450000	74455000	chr12_026	55.9088
chr12	74455000	74460000	chr12_026	63.2248
chr12	74460000	74465000	chr12_026	68.4397
chr12	74470000	74475000	chr12_026	14.8274
chr12	74475000	74480000	chr12_026	19.5863
chr12	74485000	74490000	chr12_026	39.7752
chr12	74490000	74495000	chr12_026	26.1498
chr12	74430000	74435000	chr12_026	79.6091
chr12	74465000	74470000	chr12_026	37.8013
chr12	74480000	74485000	chr12_026	47.9609
chr12	74445000	74450000	chr12_026	58.6156
chr12	74865000	74870000	chr12_027	48.8078
chr12	74875000	74880000	chr12_027	66.3811
chr12	74880000	74885000	chr12_027	64.6156
chr12	74885000	74890000	chr12_027	60.2964
chr12	74895000	74900000	chr12_027	47.0717
chr12	74900000	74905000	chr12_027	52.5798
chr12	74910000	74915000	chr12_027	64.0293
chr12	74915000	74920000	chr12_027	62.355
chr12	74925000	74930000	chr12_027	55.8795
chr12	74930000	74935000	chr12_027	73.2573
chr12	74935000	74940000	chr12_027	61.101
chr12	74945000	74950000	chr12_027	58.6254
chr12	74950000	74955000	chr12_027	62.456
chr12	74960000	74965000	chr12_027	58.9609
chr12	74965000	74970000	chr12_027	59.1401
chr12	74870000	74875000	chr12_027	64.3648
chr12	74890000	74895000	chr12_027	62.2932
chr12	74905000	74910000	chr12_027	60.2997
chr12	74920000	74925000	chr12_027	62.8958
chr12	74940000	74945000	chr12_027	62.5961
chr12	74955000	74960000	chr12_027	63.3127
chr12	74970000	74975000	chr12_027	19.3355
chr12	75550000	75555000	chr12_028	66.7948
chr12	75555000	75560000	chr12_028	56.1238
chr12	75565000	75570000	chr12_028	40.9251
chr12	75570000	75575000	chr12_028	29.2052
chr12	75580000	75585000	chr12_028	33.3192
chr12	75585000	75590000	chr12_028	32.9609
chr12	75590000	75595000	chr12_028	35.0358
chr12	75600000	75605000	chr12_028	56.3941
chr12	75605000	75610000	chr12_028	42.5407
chr12	75615000	75620000	chr12_028	35.8241
chr12	75620000	75625000	chr12_028	22.2182
chr12	75630000	75635000	chr12_028	13.0521
chr12	75635000	75640000	chr12_028	13.6254
chr12	75645000	75650000	chr12_028	13.215
chr12	75650000	75655000	chr12_028	7.69381
chr12	75545000	75550000	chr12_028	12.2052
chr12	75560000	75565000	chr12_028	44.5407
chr12	75575000	75580000	chr12_028	33.4821
chr12	75595000	75600000	chr12_028	34.4202
chr12	75610000	75615000	chr12_028	44.3322
chr12	75640000	75645000	chr12_028	12.2508
chr12	75625000	75630000	chr12_028	16.1857
chr12	75665000	75670000	chr12_029	9.89577
chr12	75670000	75675000	chr12_029	9.80456
chr12	75680000	75685000	chr12_029	9.69707
chr12	75685000	75690000	chr12_029	12.8469
chr12	75695000	75700000	chr12_029	23.1759
chr12	75700000	75705000	chr12_029	24.873
chr12	75705000	75710000	chr12_029	22.5765
chr12	75715000	75720000	chr12_029	22.4137
chr12	75720000	75725000	chr12_029	31.6254
chr12	75730000	75735000	chr12_029	45.1466
chr12	75735000	75740000	chr12_029	34.9967
chr12	75745000	75750000	chr12_029	24.3648
chr12	75750000	75755000	chr12_029	21.9153
chr12	75760000	75765000	chr12_029	22.8274
chr12	75765000	75770000	chr12_029	31.0261
chr12	75770000	75775000	chr12_029	22.8143
chr12	75780000	75785000	chr12_029	18.8664
chr12	75660000	75665000	chr12_029	8.47883
chr12	75675000	75680000	chr12_029	9.85993
chr12	75690000	75695000	chr12_029	22.5603
chr12	75710000	75715000	chr12_029	22.1596
chr12	75725000	75730000	chr12_029	41.2899
chr12	75740000	75745000	chr12_029	32.785
chr12	75775000	75780000	chr12_029	22.2378
chr12	75755000	75760000	chr12_029	21.8827
chr12	75835000	75840000	chr12_030	15.9805
chr12	75845000	75850000	chr12_030	38.7557
chr12	75850000	75855000	chr12_030	38.4332
chr12	75860000	75865000	chr12_030	42.3453
chr12	75865000	75870000	chr12_030	38.8078
chr12	75875000	75880000	chr12_030	39.759
chr12	75880000	75885000	chr12_030	39.9446
chr12	75885000	75890000	chr12_030	7.59283
chr12	75895000	75900000	chr12_030	24.2997
chr12	75900000	75905000	chr12_030	24.7622
chr12	75910000	75915000	chr12_030	21.5179
chr12	75915000	75920000	chr12_030	35.6417
chr12	75925000	75930000	chr12_030	36.5635
chr12	75930000	75935000	chr12_030	38.2964
chr12	75940000	75945000	chr12_030	38.7036
chr12	75945000	75950000	chr12_030	35.1303
chr12	75840000	75845000	chr12_030	24.7557
chr12	75855000	75860000	chr12_030	40.557
chr12	75870000	75875000	chr12_030	40.899
chr12	75905000	75910000	chr12_030	22.2573
chr12	75920000	75925000	chr12_030	38.1401
chr12	75935000	75940000	chr12_030	36.5342
chr12	75890000	75895000	chr12_030	21.8274
chr12	78860000	78865000	chr12_031	25.0423
chr12	78865000	78870000	chr12_031	24.1303
chr12	78875000	78880000	chr12_031	30.0391
chr12	78880000	78885000	chr12_031	48.4104
chr12	78890000	78895000	chr12_031	40.456
chr12	78895000	78900000	chr12_031	38.3029
chr12	78900000	78905000	chr12_031	20.2443
chr12	78910000	78915000	chr12_031	26.6287
chr12	78915000	78920000	chr12_031	24.7557
chr12	78925000	78930000	chr12_031	27.5603
chr12	78930000	78935000	chr12_031	36.1531
chr12	78940000	78945000	chr12_031	22.0749
chr12	78945000	78950000	chr12_031	19.2508
chr12	78955000	78960000	chr12_031	18.1661
chr12	78960000	78965000	chr12_031	17.8925
chr12	78965000	78970000	chr12_031	18.8111
chr12	78975000	78980000	chr12_031	18.4267
chr12	78980000	78985000	chr12_031	17.3062
chr12	78855000	78860000	chr12_031	28.4756
chr12	78870000	78875000	chr12_031	28.9935
chr12	78885000	78890000	chr12_031	44.0163
chr12	78920000	78925000	chr12_031	23.4658
chr12	78935000	78940000	chr12_031	28.9674
chr12	78950000	78955000	chr12_031	18.9186
chr12	78970000	78975000	chr12_031	18.2443
chr12	78985000	78990000	chr12_031	19.5863
chr12	78905000	78910000	chr12_031	20.7231
chr12	79110000	79115000	chr12_032	11.3648
chr12	79120000	79125000	chr12_032	23.3746
chr12	79125000	79130000	chr12_032	10.2866
chr12	79135000	79140000	chr12_032	9.63192
chr12	79140000	79145000	chr12_032	10.0619
chr12	79145000	79150000	chr12_032	9.00651
chr12	79155000	79160000	chr12_032	8.60912
chr12	79160000	79165000	chr12_032	9.59283
chr12	79170000	79175000	chr12_032	8.90879
chr12	79175000	79180000	chr12_032	10.0684
chr12	79115000	79120000	chr12_032	16.241
chr12	79130000	79135000	chr12_032	10.0814
chr12	79150000	79155000	chr12_032	9.68404
chr12	79180000	79185000	chr12_032	10.5147
chr12	79165000	79170000	chr12_032	9.88274
chr12	79195000	79200000	chr12_033	20.1922
chr12	79745000	79750000	chr12_034	7.63518
chr12	79750000	79755000	chr12_034	8.6873
chr12	79760000	79765000	chr12_034	6.82736
chr12	79765000	79770000	chr12_034	8.23453
chr12	79775000	79780000	chr12_034	8.08469
chr12	79780000	79785000	chr12_034	8.04886
chr12	79740000	79745000	chr12_034	8.29967
chr12	79755000	79760000	chr12_034	8.1987
chr12	79770000	79775000	chr12_034	8.20195
chr12	79810000	79815000	chr12_035	11.7134
chr12	79815000	79820000	chr12_035	37.658
chr12	79825000	79830000	chr12_035	48.4821
chr12	79830000	79835000	chr12_035	56.2508
chr12	79840000	79845000	chr12_035	48.9739
chr12	79845000	79850000	chr12_035	55.772
chr12	79850000	79855000	chr12_035	45.2704
chr12	79860000	79865000	chr12_035	52.4235
chr12	79865000	79870000	chr12_035	55.9544
chr12	79835000	79840000	chr12_035	45.9121
chr12	79855000	79860000	chr12_035	47.3322
chr12	79870000	79875000	chr12_035	47.7362
chr12	79820000	79825000	chr12_035	46.5179
chr12	80040000	80045000	chr12_036	18.2769
chr12	82465000	82470000	chr12_037	19.4658
chr12	82470000	82475000	chr12_037	22.5668
chr12	82480000	82485000	chr12_037	10.3746
chr12	82485000	82490000	chr12_037	10.1466
chr12	82495000	82500000	chr12_037	9.66775
chr12	82500000	82505000	chr12_037	10.1661
chr12	82510000	82515000	chr12_037	20.2573
chr12	82515000	82520000	chr12_037	43.7427
chr12	82520000	82525000	chr12_037	17.4235
chr12	82530000	82535000	chr12_037	17.2736
chr12	82535000	82540000	chr12_037	17.7199
chr12	82545000	82550000	chr12_037	17.0684
chr12	82550000	82555000	chr12_037	18
chr12	82560000	82565000	chr12_037	18.7459
chr12	82565000	82570000	chr12_037	17.7394
chr12	82570000	82575000	chr12_037	17.9316
chr12	82580000	82585000	chr12_037	7.60912
chr12	82585000	82590000	chr12_037	8.60912
chr12	82595000	82600000	chr12_037	8.79479
chr12	82460000	82465000	chr12_037	9.44625
chr12	82475000	82480000	chr12_037	32.5179
chr12	82490000	82495000	chr12_037	12.1857
chr12	82505000	82510000	chr12_037	9.24104
chr12	82525000	82530000	chr12_037	16.4756
chr12	82540000	82545000	chr12_037	19.2899
chr12	82555000	82560000	chr12_037	17.899
chr12	82590000	82595000	chr12_037	7.22801
chr12	82575000	82580000	chr12_037	8.60261
chr12	82660000	82665000	chr12_038	6.90879
chr12	82665000	82670000	chr12_038	12.8567
chr12	82675000	82680000	chr12_038	17.0195
chr12	82680000	82685000	chr12_038	13.7394
chr12	82685000	82690000	chr12_038	13.1954
chr12	82670000	82675000	chr12_038	14.2508
chr12	82690000	82695000	chr12_038	10.7427
chr12	83545000	83550000	chr12_039	18.9642
chr12	83550000	83555000	chr12_039	12.9055
chr12	83560000	83565000	chr12_039	19.1466
chr12	83565000	83570000	chr12_039	34.5179
chr12	83575000	83580000	chr12_039	31.7134
chr12	83580000	83585000	chr12_039	50.7362
chr12	83585000	83590000	chr12_039	47.8958
chr12	83595000	83600000	chr12_039	17.9772
chr12	83600000	83605000	chr12_039	16.7166
chr12	83610000	83615000	chr12_039	18.1987
chr12	83615000	83620000	chr12_039	18.7655
chr12	83625000	83630000	chr12_039	15.0749
chr12	83630000	83635000	chr12_039	18.772
chr12	83635000	83640000	chr12_039	18.9609
chr12	83645000	83650000	chr12_039	18.2052
chr12	83650000	83655000	chr12_039	18.0489
chr12	83660000	83665000	chr12_039	18.3909
chr12	83555000	83560000	chr12_039	12.1042
chr12	83570000	83575000	chr12_039	21.899
chr12	83590000	83595000	chr12_039	26.2606
chr12	83605000	83610000	chr12_039	18.2085
chr12	83640000	83645000	chr12_039	19.3746
chr12	83655000	83660000	chr12_039	17.57
chr12	83620000	83625000	chr12_039	17.9707
chr12	83790000	83795000	chr12_040	10.5863
chr12	83795000	83800000	chr12_040	11.0977
chr12	83805000	83810000	chr12_040	10.2052
chr12	83785000	83790000	chr12_040	8.15635
chr12	83800000	83805000	chr12_040	10.43
chr12	83905000	83910000	chr12_041	12.6645
chr12	83910000	83915000	chr12_041	22.8339
chr12	83920000	83925000	chr12_041	21.5375
chr12	83925000	83930000	chr12_041	23.2736
chr12	83930000	83935000	chr12_041	22.0391
chr12	83940000	83945000	chr12_041	36.8436
chr12	83945000	83950000	chr12_041	45.645
chr12	83955000	83960000	chr12_041	36.1336
chr12	83960000	83965000	chr12_041	27.443
chr12	83970000	83975000	chr12_041	13.4137
chr12	83975000	83980000	chr12_041	13.0717
chr12	83985000	83990000	chr12_041	17.3648
chr12	83990000	83995000	chr12_041	40.1889
chr12	83995000	84000000	chr12_041	37.2215
chr12	84005000	84010000	chr12_041	35.5147
chr12	84010000	84015000	chr12_041	36.7329
chr12	84020000	84025000	chr12_041	36.4495
chr12	84025000	84030000	chr12_041	33.8013
chr12	84035000	84040000	chr12_041	36.0326
chr12	84040000	84045000	chr12_041	35.8893
chr12	84050000	84055000	chr12_041	36.6743
chr12	84055000	84060000	chr12_041	18.7166
chr12	84060000	84065000	chr12_041	12.5863
chr12	83915000	83920000	chr12_041	19.9283
chr12	83935000	83940000	chr12_041	27.5049
chr12	83950000	83955000	chr12_041	36.6482
chr12	83965000	83970000	chr12_041	12.4072
chr12	83980000	83985000	chr12_041	9.46254
chr12	84000000	84005000	chr12_041	39.0293
chr12	84030000	84035000	chr12_041	36.3127
chr12	84045000	84050000	chr12_041	36.2345
chr12	84015000	84020000	chr12_041	36.2215
chr12	84070000	84075000	chr12_042	11.8762
chr12	84075000	84080000	chr12_042	15.759
chr12	84085000	84090000	chr12_042	19.9121
chr12	84090000	84095000	chr12_042	41.3681
chr12	84100000	84105000	chr12_042	37.5603
chr12	84105000	84110000	chr12_042	33.4625
chr12	84110000	84115000	chr12_042	38.1824
chr12	84120000	84125000	chr12_042	41.9218
chr12	84125000	84130000	chr12_042	35.5407
chr12	84135000	84140000	chr12_042	32.0261
chr12	84140000	84145000	chr12_042	11.8143
chr12	84150000	84155000	chr12_042	11.8762
chr12	84155000	84160000	chr12_042	20.4756
chr12	84165000	84170000	chr12_042	11.7394
chr12	84080000	84085000	chr12_042	14.9674
chr12	84095000	84100000	chr12_042	36.4169
chr12	84115000	84120000	chr12_042	46.4235
chr12	84130000	84135000	chr12_042	34.8534
chr12	84160000	84165000	chr12_042	11.7915
chr12	84145000	84150000	chr12_042	11.4919
chr12	84190000	84195000	chr12_043	33.5309
chr12	84200000	84205000	chr12_043	39
chr12	84205000	84210000	chr12_043	38.0489
chr12	84215000	84220000	chr12_043	41.2508
chr12	84220000	84225000	chr12_043	47.0456
chr12	84225000	84230000	chr12_043	38.4365
chr12	84235000	84240000	chr12_043	39.3583
chr12	84240000	84245000	chr12_043	37.9283
[truncated: 2,248 more rows]

[truncated: 5 more sheets: GOT3_CN, T1000_CN, LPS141_CN, ST059_CN, ST079_CN]
